# Supplementary material for: Dimethylzinc-mediated enantioselective addition of terminal alkynes to 1,2-diketones using perhydro-1,3-benzoxazines as ligands
Source: Royal Society of Chemistry journal article supplement (doi:10.1039/d1ob00249j), 2021-01-01
Supplement: d1ob00249j1.pdf [file d1ob00249j1.pdf]

## Supporting Information

### Dimethylzinc-mediated enantioselective addition of terminal alkynes to 1,2-diketones using perhydro-1,3-benzoxazines as ligands

Elena Prieto, Rebeca Infante, Javier Nieto and Celia Andrés

*Instituto CINQUIMA and Departamento de Química Orgánica, Facultad de Ciencias, Universidad de Valladolid, Paseo de Belén, 7, 47011 Valladolid, Spain.*

*javiernr@qo.uva.es*

*celian@qo.uva.es*

### Table of Contents

|                                                                   |     |
|-------------------------------------------------------------------|-----|
| Synthesis of diketones <b>5b</b> , <b>5d</b> and <b>5f</b> .....  | S2  |
| Copies of <sup>1</sup> H-NMR and <sup>13</sup> C-NMR Spectra..... | S5  |
| HPLC Data.....                                                    | S32 |

## Synthesis of diketones **5b** and **5f**.

Diketones **5b** and **5f** were prepared in a two-step process involving (2-aryl-1,3-dithian-2-yl)lithium addition to arylaldehydes followed by treatment of the resulting alcohol with NBS in aqueous acetone.<sup>[1]</sup>

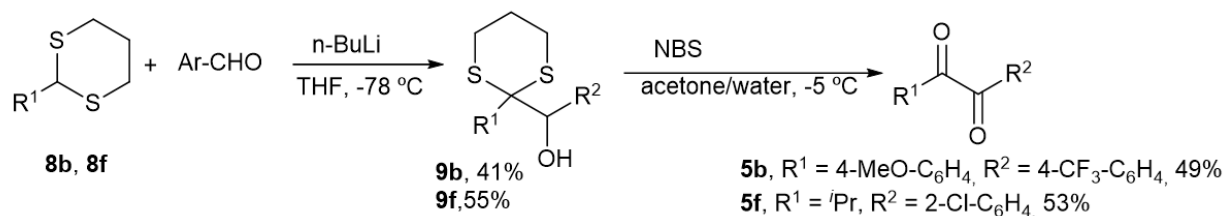

## Synthesis of **9b** and **9f**

To the solution of dithiane **8b** or **8f** (5 mmol), previously prepared according to the literature,<sup>[2]</sup> in dry THF (30 mL), *n*-BuLi (1.6 M) (5.5 mmol) was added at -78°C. After stirring at the same temperature for 2h, the corresponding aromatic aldehyde (5.5 mmol) was added slowly and the reaction was continued for 1h. After completion of the reaction, aqueous NH<sub>4</sub>Cl was added to the reaction mixture. Solvent THF was evaporated and the residue was extracted with ethyl acetate. The organic layer was dried over anhydrous Mg<sub>2</sub>SO<sub>4</sub>, concentrated, and purified by column chromatography using mixtures of ethyl acetate and hexanes.

**(2-(4-methoxyphenyl)-1,3-dithian-2-yl)(4-(trifluoromethyl)phenyl)methanol (9b)**. This compound was obtained from **8b** (1.13 g) and purified by flash chromatography (hexanes/ethyl acetate). Pale yellow oil; yield: 0.82 g, 41%; <sup>1</sup>H NMR (500 MHz, CDCl<sub>3</sub>) δ: 1.89-1.95 (m, 2H), 2.65-2.77 (m, 4H), 3.13 (d, *J* = 3.1 Hz, 1H), 3.82 (s, 3H), 5.00 (d, *J* = 3.1 Hz, 1H), 6.82 (d, *J* = 8.9 Hz, 2H), 7.00 (d, *J* = 8.3 Hz, 2H), 7.38 (d, *J* = 8.3 Hz, 2H), 7.54 (d, *J* = 8.9 Hz, 2H); <sup>13</sup>C NMR (126 MHz, CDCl<sub>3</sub>) δ: 24.7, 26.8, 27.2, 55.3, 65.8, 80.4, 113.5 (2C), 124.1 (q, *J* = 272 Hz); 123.8 (q, *J* = 3.8 Hz, 2C), 128.6 (2C), 128.7, 130.0 (q, *J* = 32.3 Hz), 131.6 (2C), 141.3, 159.1; IR (neat) ν: 3464, 1605, 1506, 1325, 1250, 1163, 1124, 840 cm<sup>-1</sup>; HRMS (ESI-TOF) *m/z*: calcd. for C<sub>19</sub>H<sub>19</sub>F<sub>3</sub>NaO<sub>2</sub>S<sub>2</sub><sup>+</sup> [M+Na]<sup>+</sup> 423.0671, found 423.0666.

**(2-chlorophenyl)(2-isopropyl-1,3-dithian-2-yl)methanol (9f)**. This compound was obtained from **9f** (0.85 g) and purified by flash chromatography (hexanes/ethyl acetate). Colorless oil; yield: 0.87 g, 55%; <sup>1</sup>H NMR (500 MHz, CDCl<sub>3</sub>) δ: 1.20 (d, *J* = 6.7 Hz, 3H) 1.28 (d, *J* = 6.8 Hz, 3H), 1.78 (m, 1H), 1.88 (m, 1H), 2.25 (hept, *J* = 6.7 Hz, 1H), 2.40 (ddd, *J*<sub>1</sub> = 14.1 Hz, *J*<sub>2</sub> = 9.7 Hz, *J*<sub>3</sub> = 4.2 Hz, 1H), 2.55 (m, 1H), 2.64 (dt, *J*<sub>1</sub> = 14.1 Hz, *J*<sub>2</sub> = 4.9 Hz, 1H), 2.97 (ddd, *J*<sub>1</sub> = 14.3 Hz, *J*<sub>2</sub> = 10.2 Hz, *J*<sub>3</sub> = 4.2 Hz, 1H), 3.28 (d, *J* = 5.1 Hz, 1H), 5.60 (d, *J* = 51 Hz, 1H), 7.21-7.31 (2 H), 7.35 (dd, *J*<sub>1</sub> = 7.7 Hz, *J*<sub>2</sub> = 1.6 Hz, 1H), 7.90 (dd, *J*<sub>1</sub> = 7.7, *J*<sub>2</sub> = 1.8 Hz, 1H); <sup>13</sup>C NMR (126 MHz, CDCl<sub>3</sub>) δ: 19.0, 19.4, 23.9, 25.4, 27.5, 35.9, 63.9, 72.4, 126.2, 129.0, 129.5, 130.3, 135.0, 138.2; IR (neat) ν: 3438, 2962, 2928, 2870, 1571, 1471, 1438, 1385, 1058, 1030, 756, 730, 703 cm<sup>-1</sup>; HRMS (ESI-TOF) *m/z*: calcd. for C<sub>14</sub>H<sub>19</sub>ClNaOS<sub>2</sub><sup>+</sup> [M+Na]<sup>+</sup> 325.0458, found 325.0461.

## Synthesis of diketones **5b** and **5f**

A solution of dithiane **9b** or **9f** (2.0 mmol) in acetone (15 mL) was added dropwise over a period of 20 minutes to a solution of N-bromosuccinimide (5.3g 30 mmol) in 3% water/acetone (150 ml) at 5 °C. The mixture was stirred and allowed to reach room temperature over 30 minutes, then poured onto a saturated aqueous sodium sulphite solution (120 mL) and dichloromethane (80 mL). After stirring for 10 minutes, the organic layer was separated, washed with water (3 x 50 mL) and dried (MgSO<sub>4</sub>). The solvent was removed to yield the diketone which was purified by recrystallization or by column chromatography

**1-(4-methoxyphenyl)-2-(4-(trifluoromethyl)phenyl)ethane-1,2-dione (5b).** This compound was obtained from **9b** (0.80 g) and purified by flash chromatography (hexanes/ethyl acetate). White solid; yield: 0.3 g, 49%; mp 97-99 °C (from hexane); <sup>1</sup>H NMR (500 MHz, CDCl<sub>3</sub>) δ: 3.90 (s, 3H), 6.99 (d, *J* = 8.9 Hz, 2H), 7.77 (d, *J* = 8.5 Hz, 2H), 7.96 (d, *J* = 8.9 Hz, 2H), 8.10 (d, *J* = 8.5 Hz, 2H); <sup>13</sup>C NMR (126 MHz, CDCl<sub>3</sub>) δ: 55.7, 114.5 (2C), 123.4 (q, *J* = 273 Hz); 125.7; 126.0 (q, *J* = 3.7 Hz, 2C), 130.2 (2C), 132.5 (2C), 135.7 (q, *J* = 33 Hz), 135.8, 165.2, 191.9, 193.3; IR (neat) ν: 1680, 1657, 1600, 1575, 1510, 1414, 1315, 1260, 1160, 1123, 1066, 1016, 891, 854, 747, 642, 612 cm<sup>-1</sup>; HRMS (ESI-TOF) *m/z*: calcd. for C<sub>16</sub>H<sub>11</sub>F<sub>3</sub>NaO<sub>3</sub><sup>+</sup> [M+Na]<sup>+</sup> 331.0552, found 331.0556. NMR shift values are consistent with previously reported data.<sup>[3]</sup>

**1-(2-chlorophenyl)-3-methylbutane-1,2-dione (5f).** This compound was obtained from **9f** (0.85 g) and purified by flash chromatography (hexanes/ethyl acetate). Yellow oil; yield: 0.31 g, 53%. <sup>1</sup>H NMR (500 MHz, CDCl<sub>3</sub>) δ: 1.28 (d, *J* = 7.0 Hz, 6H), 3.39 (hept, *J* = 6.8 Hz, 1H), 7.37-7.42 (m, 2H), 7.49 (ddd, *J*<sub>1</sub> = 8.0 Hz, *J*<sub>2</sub> = 7.4 Hz, *J*<sub>3</sub> = 1.7 Hz 1H), 7.65 (dd, *J*<sub>1</sub> = 7.7 Hz, *J*<sub>2</sub> = 1.7 Hz, 1H); <sup>13</sup>C NMR (126 MHz, CDCl<sub>3</sub>) δ: 17.7 (2C), 36.1, 127.2, 130.3, 131.5, 133.3, 133.8, 134.0, 193.4, 204.1; IR (neat) ν: 2975, 2936, 2875, 1712, 1685, 1590, 1440, 1466, 1283, 1050, 908, 837, 744, 641 cm<sup>-1</sup>; HRMS (ESI-TOF) *m/z*: calcd. for C<sub>11</sub>H<sub>11</sub>ClNaO<sub>2</sub><sup>+</sup> [M+Na]<sup>+</sup> 233.0340, found 233.0336.

Diketone **5d** was prepared in a two-step process involving a benzoin condensation between 2,4-dichlorobenzaldehyde and *p*-methoxybenzaldehyde to give the mixed benzoin<sup>[4]</sup> followed by a Swern oxidation.

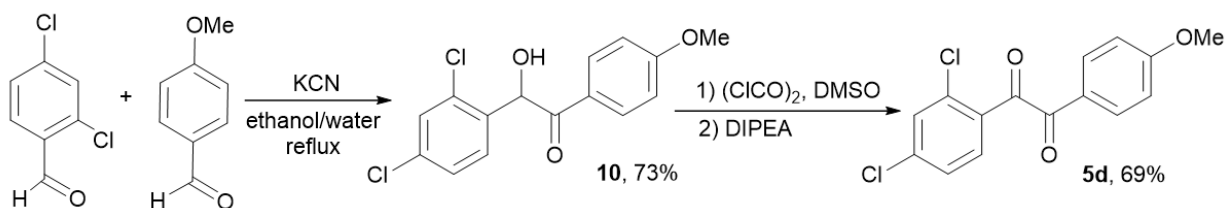

### 2-(2,4-dichlorophenyl)-2-hydroxy-1-(4-methoxyphenyl)ethan-1-one (10)

A mixture of p-methoxybenzaldehyde (0.64 mL, 5.2 mmol), 2,4-dichlorobenzaldehyde (0.92 g, 5 mL), potassium cyanide (0.22 g, 3.2 mmol), ethanol (6 mL) and water (3 mL) was charged in a microwave vial and heated at 80 °C for 1 h. The mixture was then quenched with water, extracted with dichloromethane, dried over anhydrous MgSO<sub>4</sub> and concentrated in vacuo. The crude was purified by column chromatography using a mixture of hexanes and ethyl acetate as eluent to afford the pure hydroxyketone as a pale yellow oil. Yield: 1.19 g, 73%. <sup>1</sup>H NMR (500 MHz, CDCl<sub>3</sub>) δ: 3.81 (s, 3H), 4.68 (s, 1H), 6.25 (s, 1H), 6.88 (d, *J* = 9.0 Hz, 2H), 7.04 (d, *J* = 8.4 Hz, 1H), 7.14 (dd, *J*<sub>1</sub> = 8.4 Hz, *J*<sub>2</sub> = 2.1 Hz, 1H), 7.42 (d, *J* = 2.1 Hz, 1H), 7.87 (d, *J* = 9.0 Hz, 2H); <sup>13</sup>C NMR (126 MHz, CDCl<sub>3</sub>) δ: 55.5, 71.6, 114.2 (2C), 125.7, 128.1, 129.9, 130.0, 131.3 (2C), 134.2, 135.1, 135.9, 164.4, 196.5; IR (neat) *v*: 3402, 2928, 1668, 1600, 1512, 1255, 1168, 1081, 978, 862, 795, 773, 624, 611 cm<sup>-1</sup>; HRMS (ESI-TOF) *m/z*: calcd. for C<sub>15</sub>H<sub>12</sub>Cl<sub>2</sub>NaO<sub>3</sub><sup>+</sup> [M+Na]<sup>+</sup> 333.0056, found 333.0061

### 1-(2,4-dichlorophenyl)-2-(4-methoxyphenyl)ethane-1,2-dione (5d).

To a solution of oxalyl chloride (0.4 mL, 4.75 mmol) in anhydrous dichloromethane (6 mL) cooled to -78 °C was added dropwise, over a period of 10 min, a solution of anhydrous DMSO (0.62 mL, 8.36 mmol) in anhydrous dichloromethane (1.4 mL). After complete addition, the mixture was stirred at this temperature for further 10 min; then, the hydroxyketone **10** (1.18 g, 3.8 mmol) dissolved in anhydrous dichloromethane (1.5 mL) was added dropwise over a period of 15 min. The forming suspension was stirred at -78 °C for 1 h and DIPEA (2.66 mL, 15.2 mmol) was added dropwise over a period of 5 min. The mixture was stirred at room temperature for 1 h. After full conversion, the reaction mixture was washed with a 5% aqueous solution of HCl (3 x 10 mL), water (20 mL), and brine, dried over anhydrous magnesium sulphate and concentrated in vacuo. The mixture was purified by column chromatography (hexanes/ethyl acetate) to afford the pure 1,2-diketone as a yellow solid. Yield 0.81 g, 69%; mp 121-122°C. <sup>1</sup>H NMR (500 MHz, CDCl<sub>3</sub>) δ: 3.91 (s, 3H), 7.01 (d, *J* = 9.0 Hz, 2H), 7.41 (dd, *J*<sub>1</sub> = 8.4 Hz, *J*<sub>2</sub> = 1.9 Hz, 1H), 7.45 (d, *J* = 1.9 Hz, 1H), 7.84 (d, *J* = 8.4 Hz, 1H), 8.00 (d, *J* = 9.0 Hz, 2H); <sup>13</sup>C NMR (126 MHz, CDCl<sub>3</sub>) δ: 55.6, 114.4 (2C), 125.3, 127.8, 130.4, 132.5, 132.7 (2C), 133.0, 134.7, 140.3, 164.9, 190.4, 192.7; IR (neat) *v*: 1676, 1650, 1560, 1578, 1564, 1260, 1205, 1175, 1160, 878, 828, 744, 632, 613 cm<sup>-1</sup>; HRMS (ESI-TOF) *m/z*: calcd. for C<sub>15</sub>H<sub>10</sub>Cl<sub>2</sub>NaO<sub>3</sub><sup>+</sup> [M+Na]<sup>+</sup> 330.9899, found 330.9902.

[1] P. C. B. Page, A. E. Graham, B. K. Park, *Tetrahedron*, 1992, **48**, 7265.

[2] R. B. Kothapalli, R. Niddana, R. Balamurugan, *Org. Lett.* 2014, **16**, 1278.

[3] Z. Wan, C. D. Jones, D. Mitchell, J. Y. Pu, T. Y. Zhang, *J. Org. Chem.* 2006, **71**, 826.

[4] J. S. Buck, W. S. Ide, *J. Am. Chem. Soc.*, 1930, **52**, 4107.

# Copies of $^1\text{H}$ -NMR and $^{13}\text{C}$ -NMR Spectra

## (2-(4-methoxyphenyl)-1,3-dithian-2-yl)(4-(trifluoromethyl)phenyl)methanol (9b) $^1\text{H}$ -NMR (500 MHz, $\text{CDCl}_3$ )

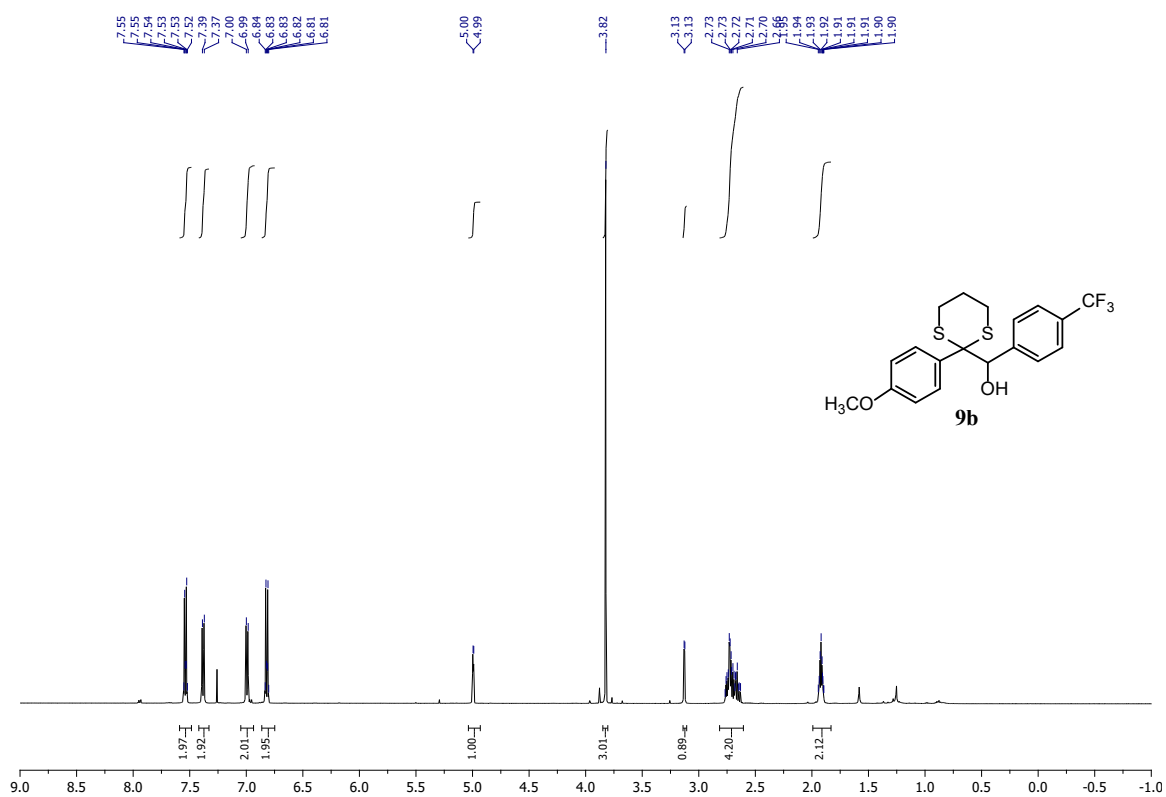

## $^{13}\text{C}$ -NMR (126 MHz, $\text{CDCl}_3$ )

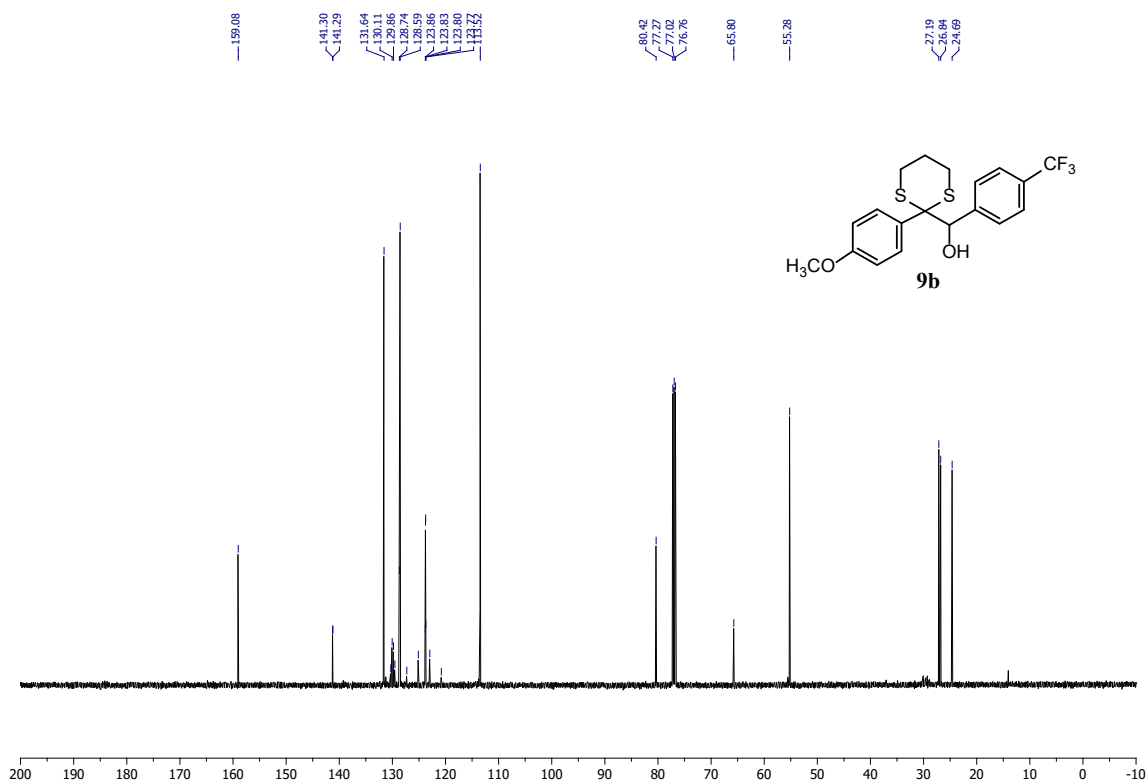

(2-chlorophenyl)(2-isopropyl-1,3-dithian-2-yl)methanol (9f).

$^1\text{H-NMR}$  (500 MHz,  $\text{CDCl}_3$ )

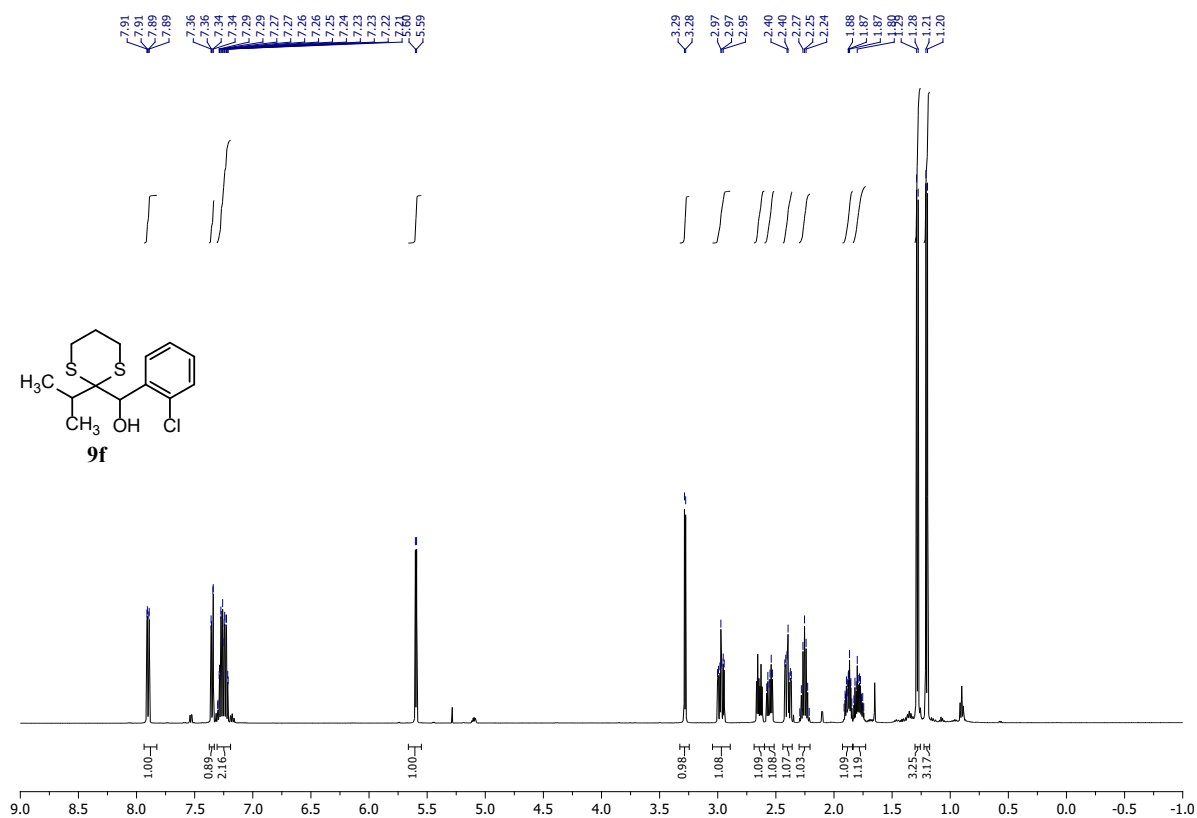

$^{13}\text{C-NMR}$  (126 MHz,  $\text{CDCl}_3$ )

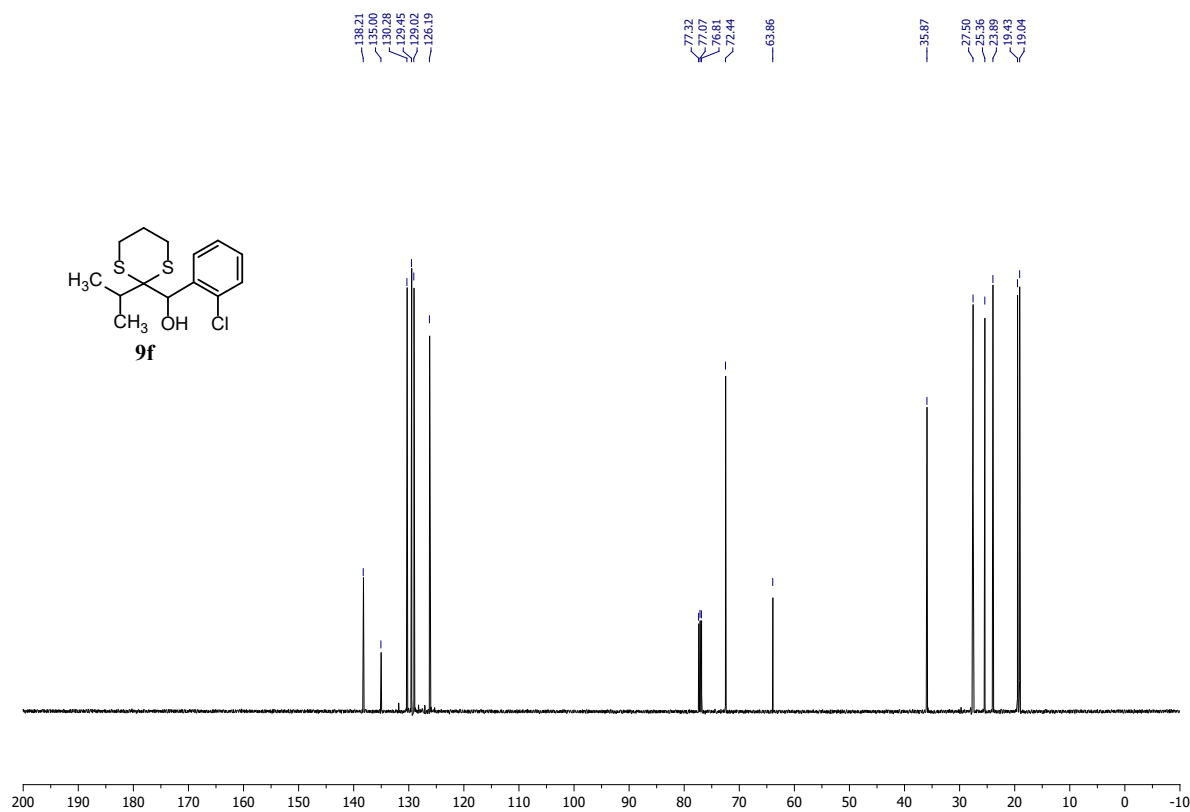

# 1-(4-methoxyphenyl)-2-(4-(trifluoromethyl)phenyl)ethane-1,2-dione (5b)

$^1\text{H-NMR}$  (500 MHz,  $\text{CDCl}_3$ )

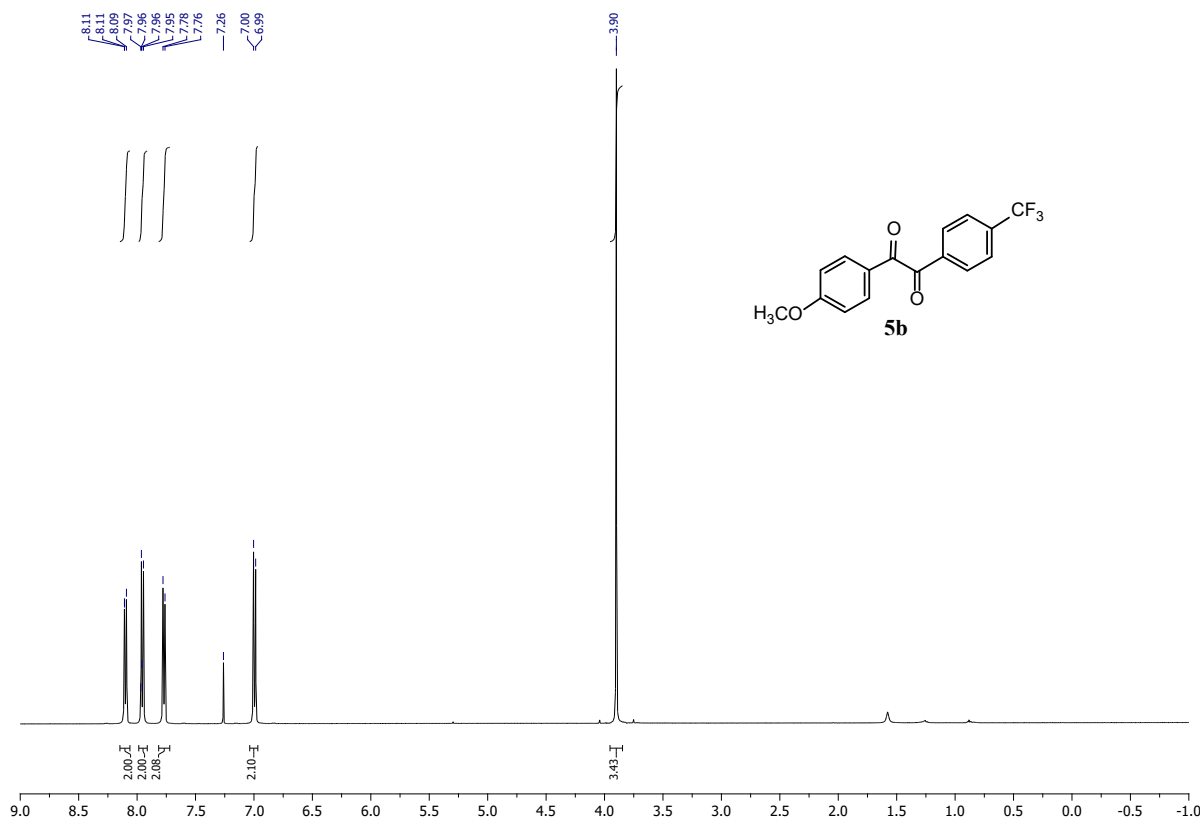

$^{13}\text{C-NMR}$  (126 MHz,  $\text{CDCl}_3$ )

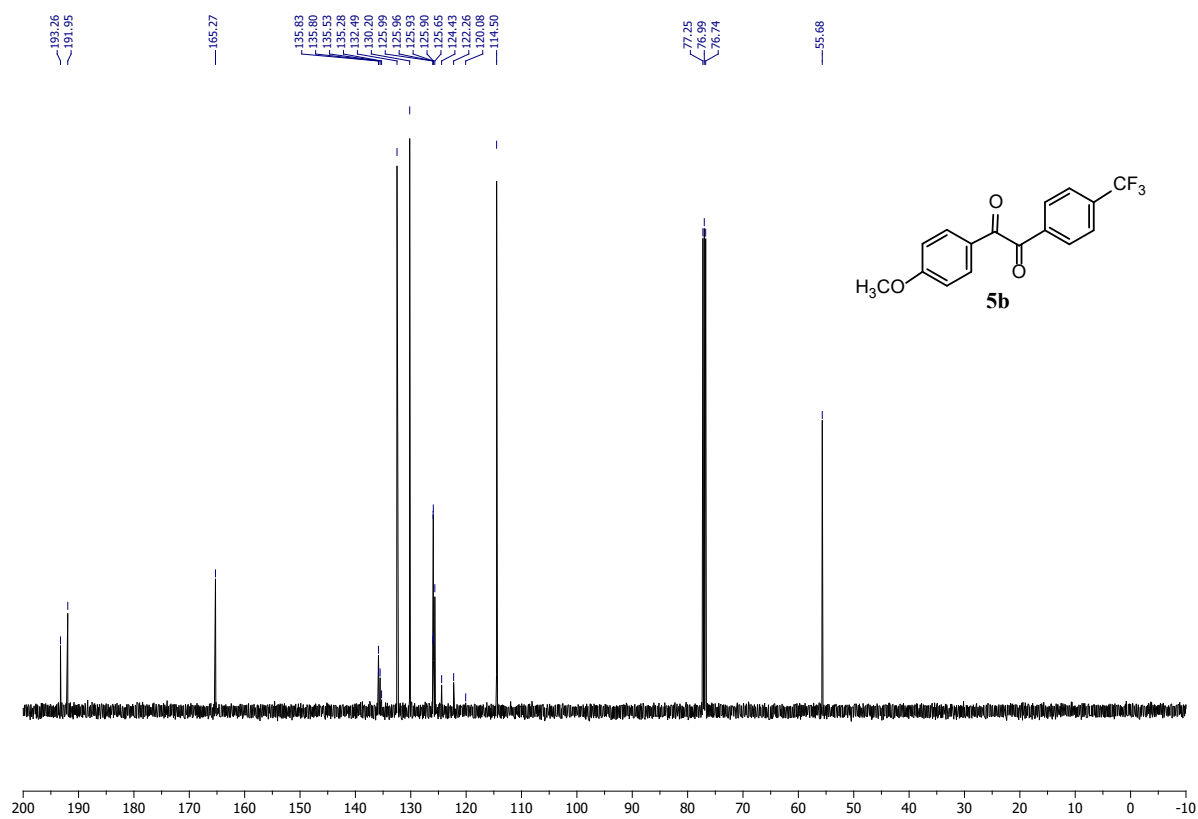

### 1-(2-chlorophenyl)-3-methylbutane-1,2-dione (5f)

$^1\text{H-NMR}$  (500 MHz,  $\text{CDCl}_3$ )

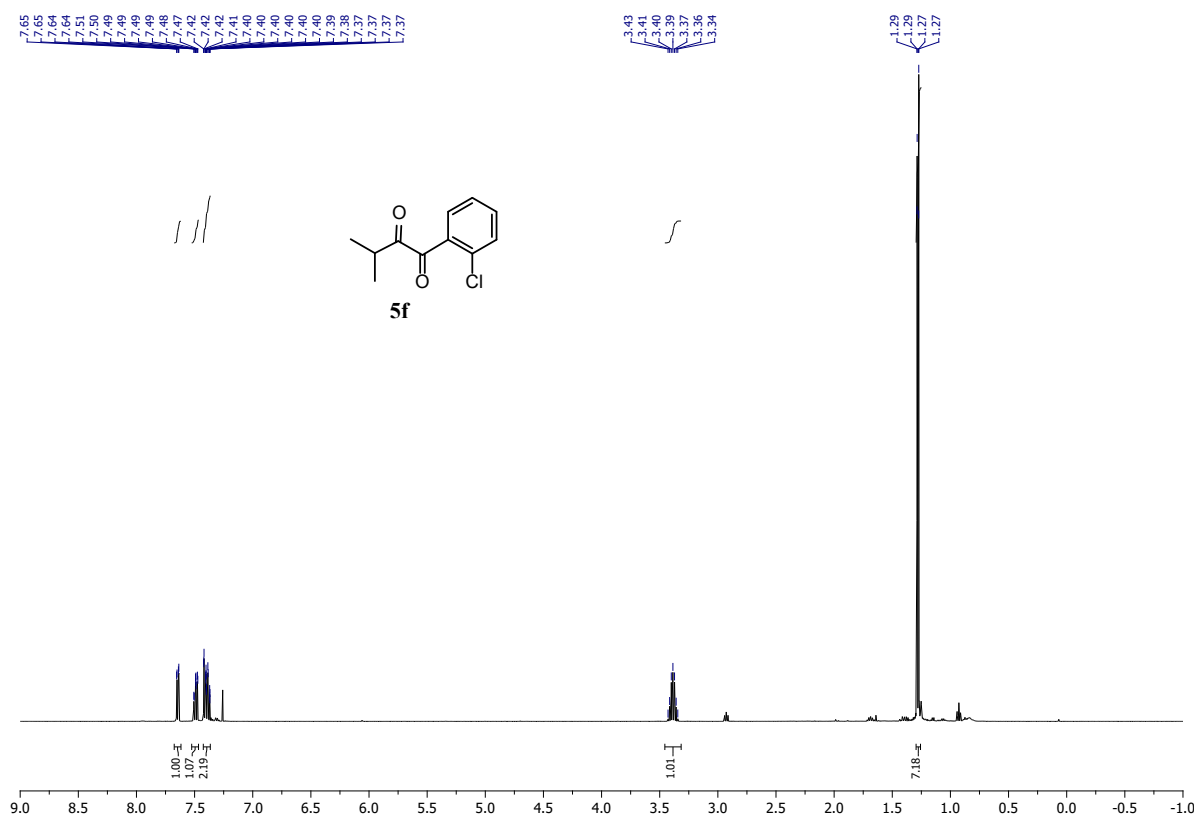

$^{13}\text{C-NMR}$  (126 MHz,  $\text{CDCl}_3$ )

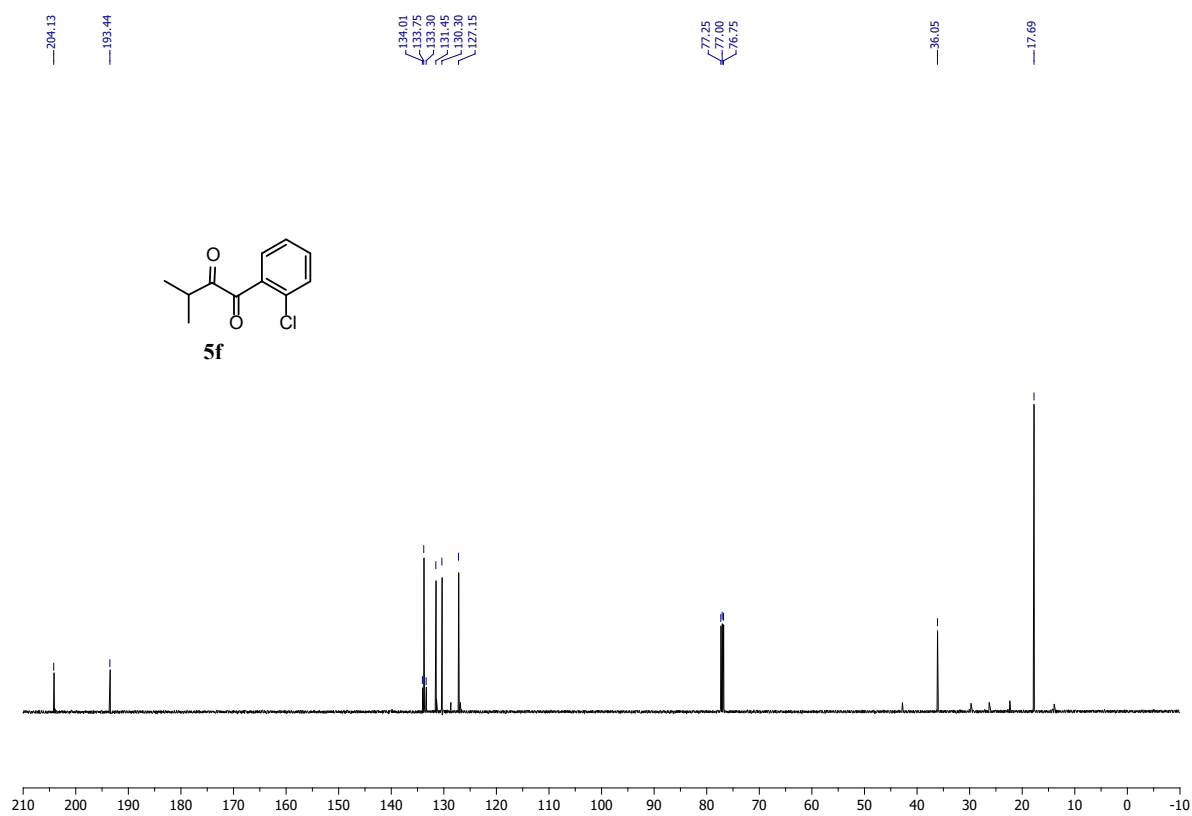



### 2-(2,4-dichlorophenyl)-2-hydroxy-1-(4-methoxyphenyl)ethan-1-one (10)

<sup>1</sup>H-NMR (500 MHz, CDCl<sub>3</sub>)

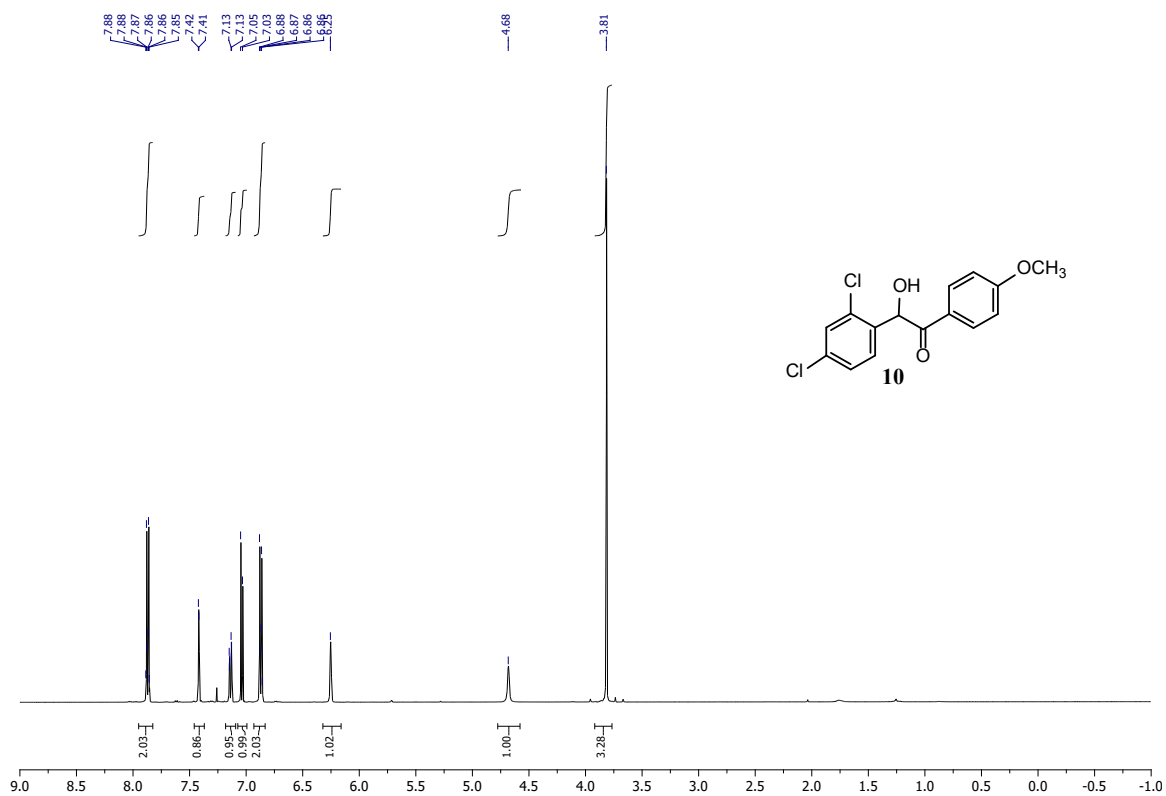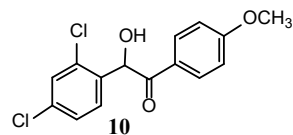

### <sup>13</sup>C-NMR (126 MHz, CDCl<sub>3</sub>)

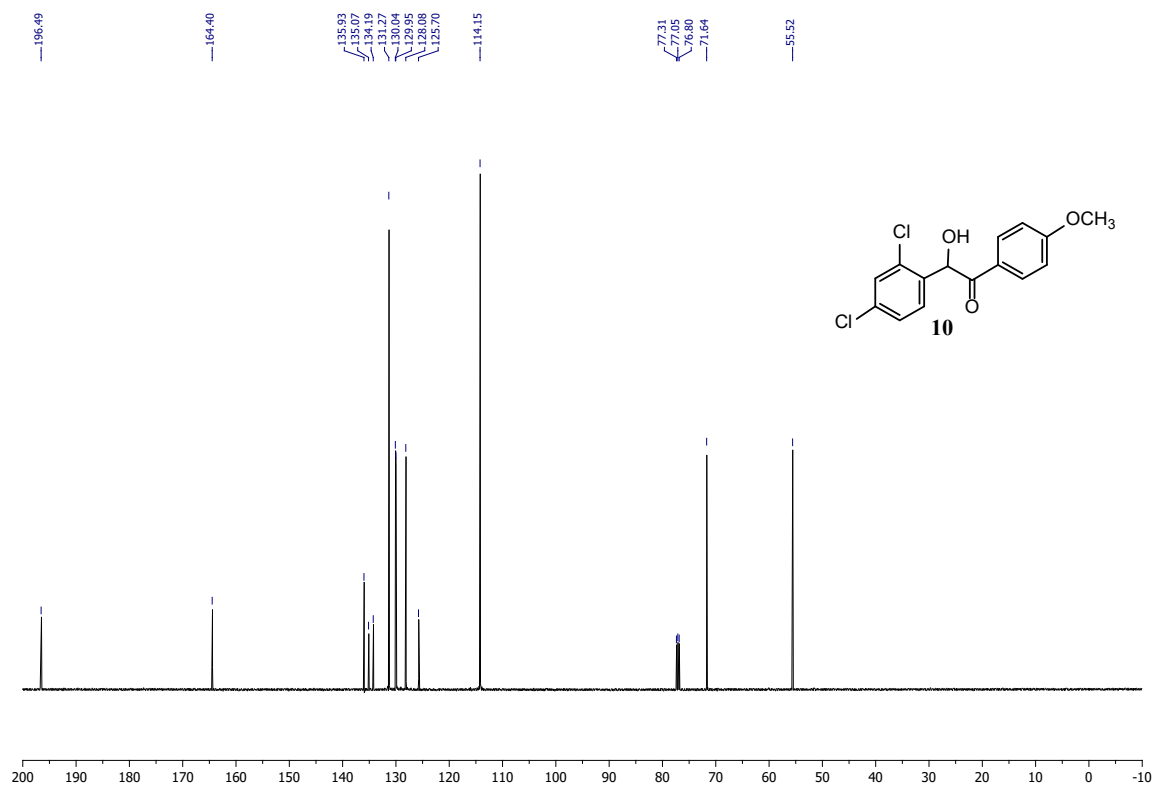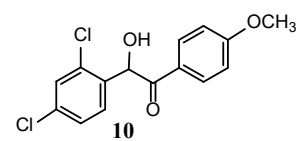

# 1-(2,4-dichlorophenyl)-2-(4-methoxyphenyl)ethane-1,2-dione (5d)

$^1\text{H-NMR}$  (500 MHz,  $\text{CDCl}_3$ )

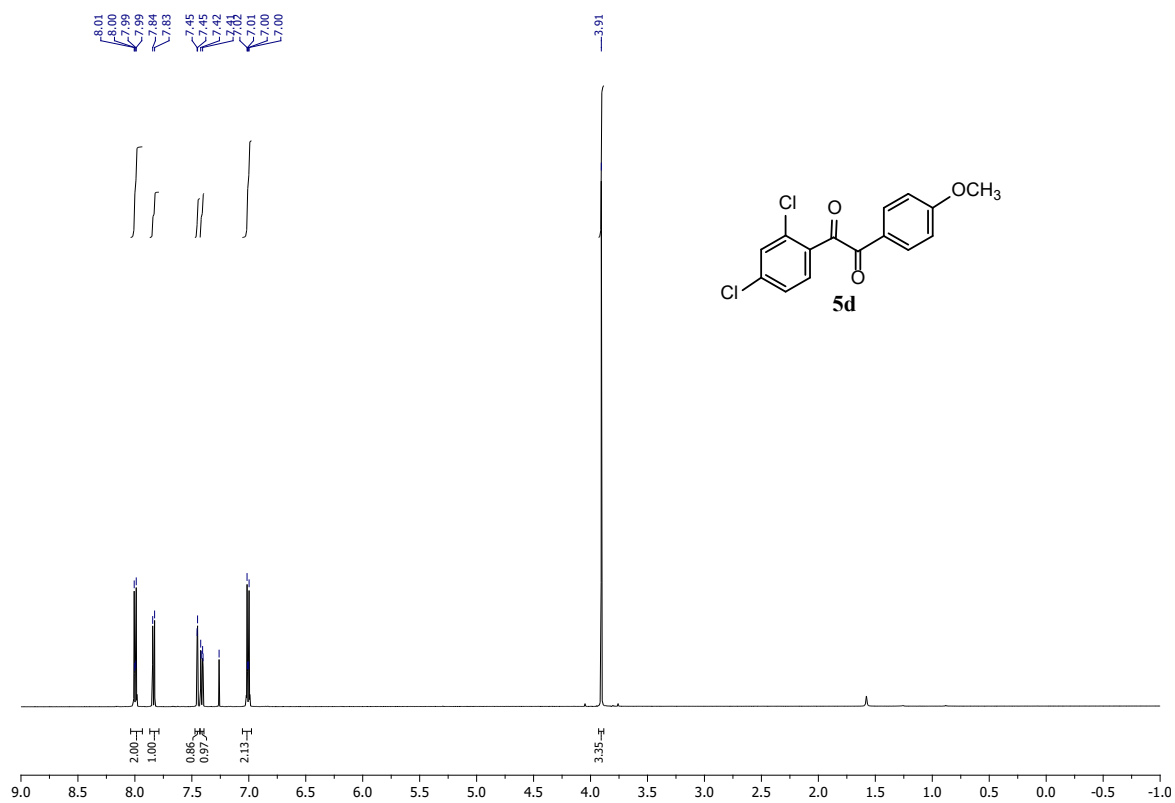

$^{13}\text{C-NMR}$  (126 MHz,  $\text{CDCl}_3$ )

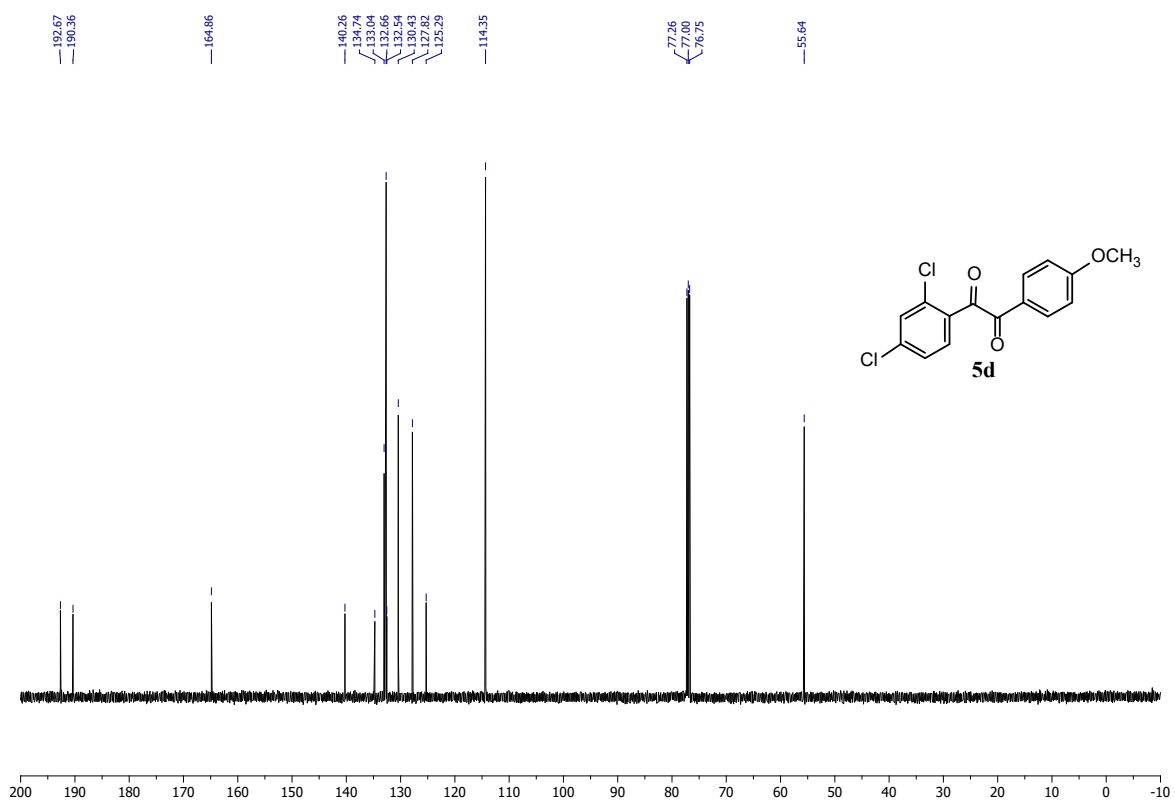

**(S)-2-hydroxy-1,2-diphenyl-4-(p-tolyl)but-3-yn-1-one (3j)**

<sup>1</sup>H-NMR (400 MHz, CDCl<sub>3</sub>)

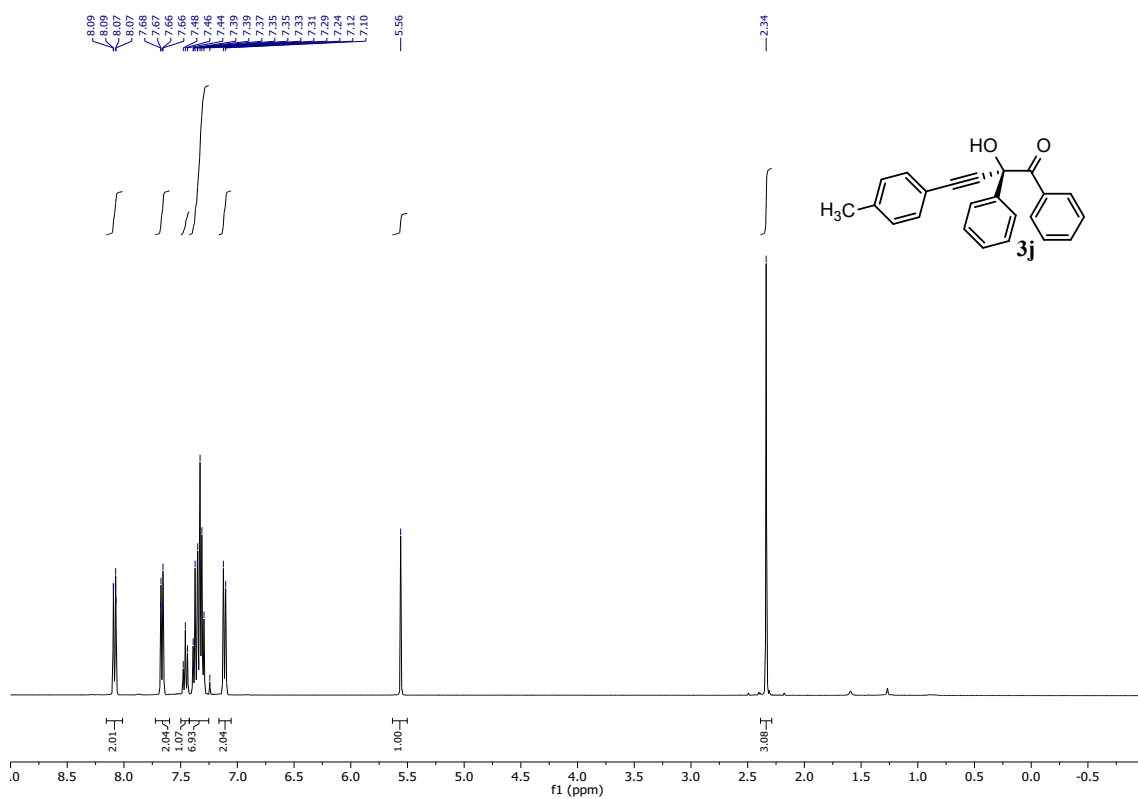

<sup>13</sup>C-NMR (100 MHz, CDCl<sub>3</sub>)

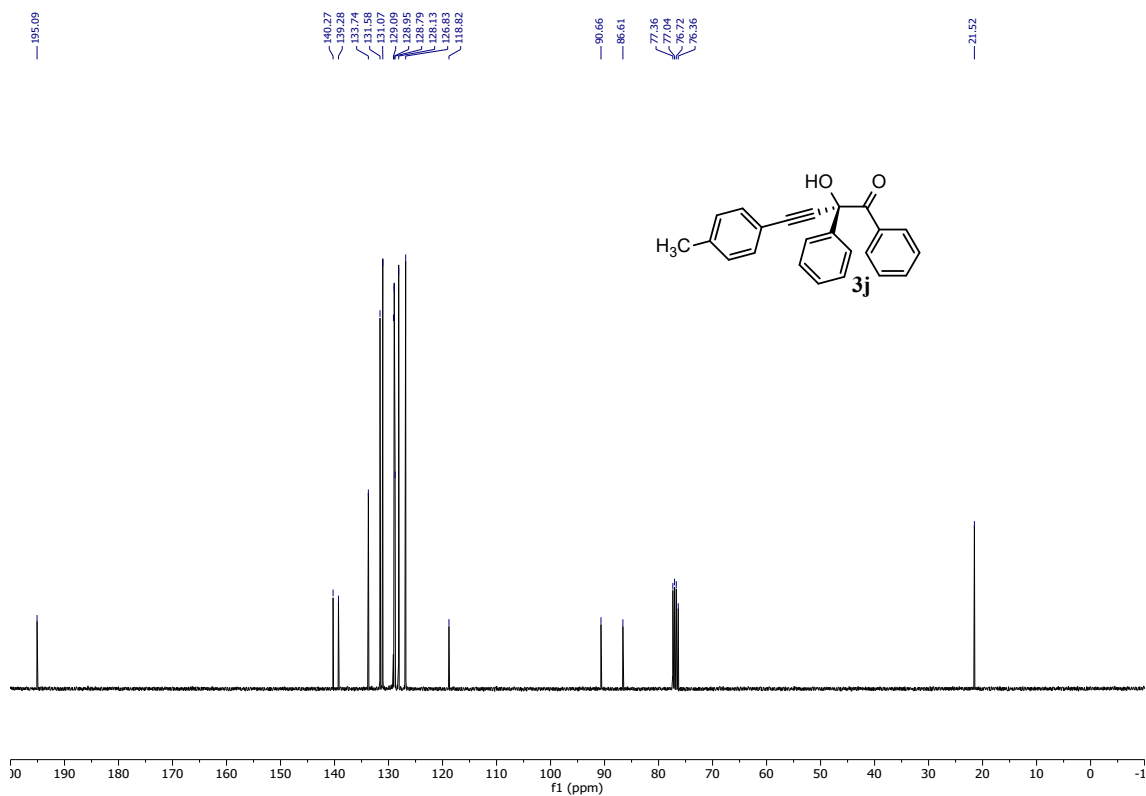

**(S)-4-(4-bromophenyl)-2-hydroxy-1,2-diphenylbut-3-yn-1-one (3k)**

<sup>1</sup>H-NMR (400 MHz, CDCl<sub>3</sub>)

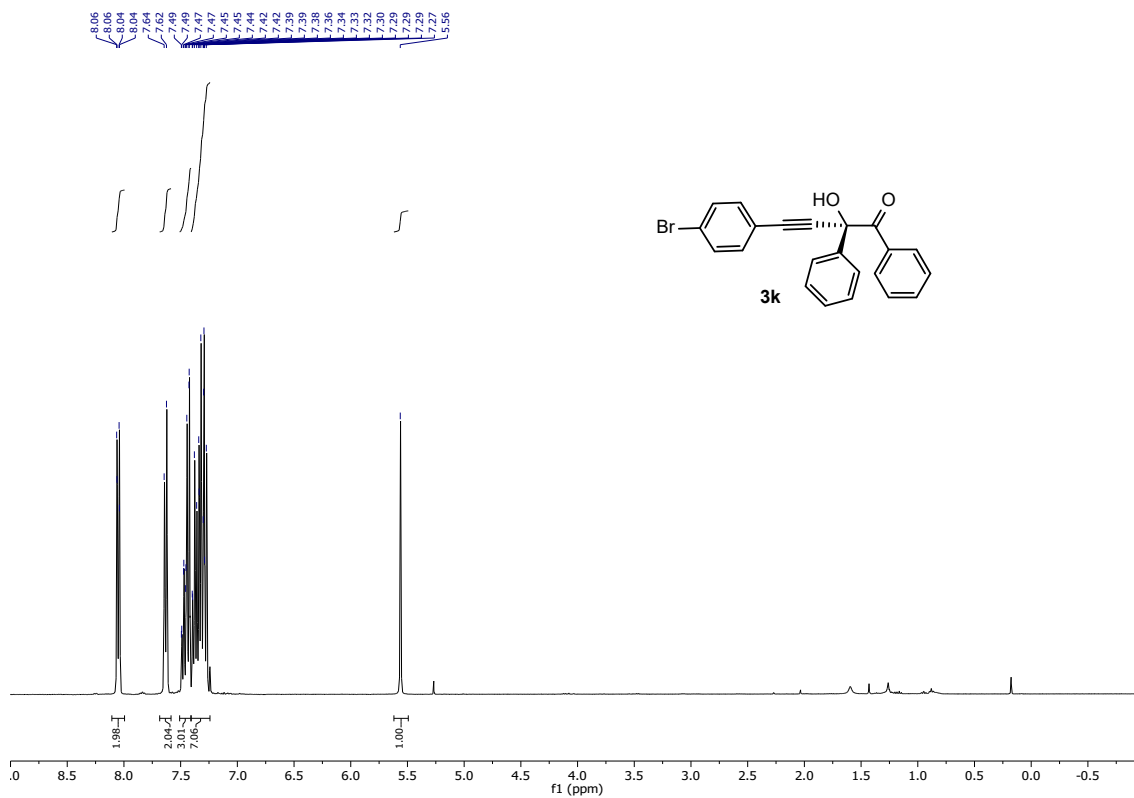

<sup>13</sup>C-NMR (100 MHz, CDCl<sub>3</sub>)

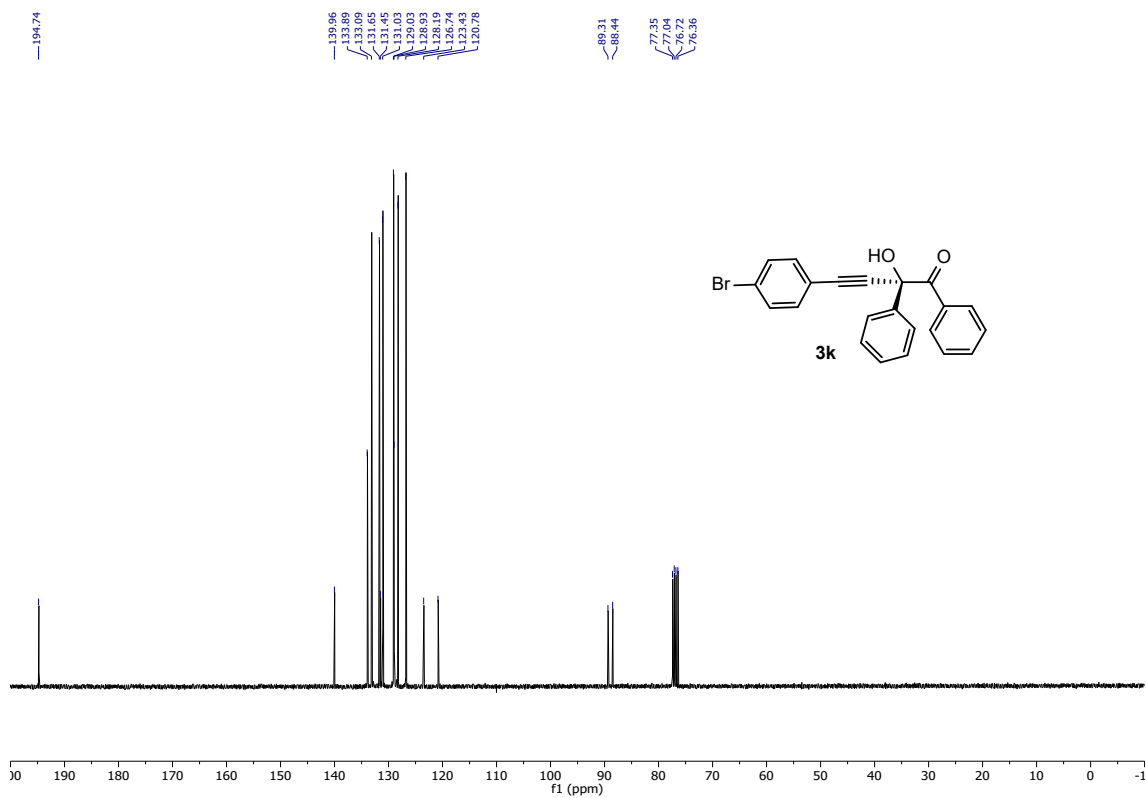

**(S)-4-(2-fluorophenyl)-2-hydroxy-1,2-diphenylbut-3-yn-1-one (31)**

<sup>1</sup>H-NMR (400 MHz, CDCl<sub>3</sub>)

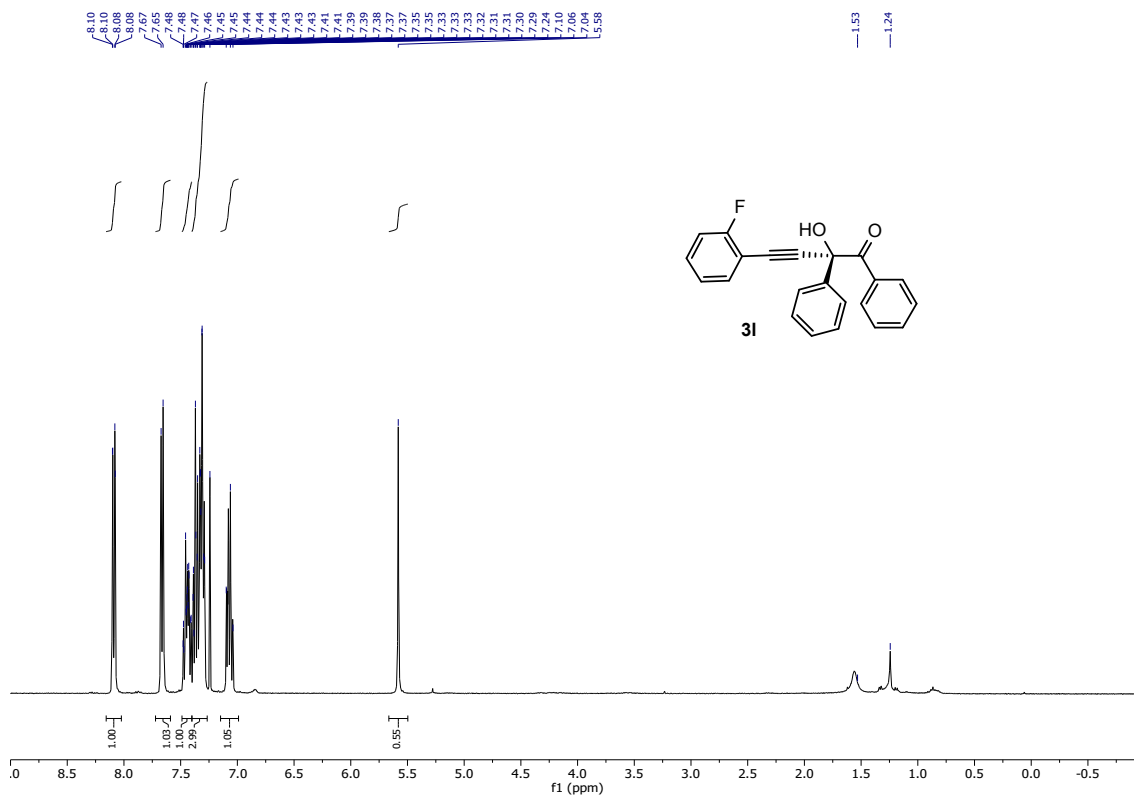

<sup>13</sup>C-NMR (100 MHz, CDCl<sub>3</sub>)

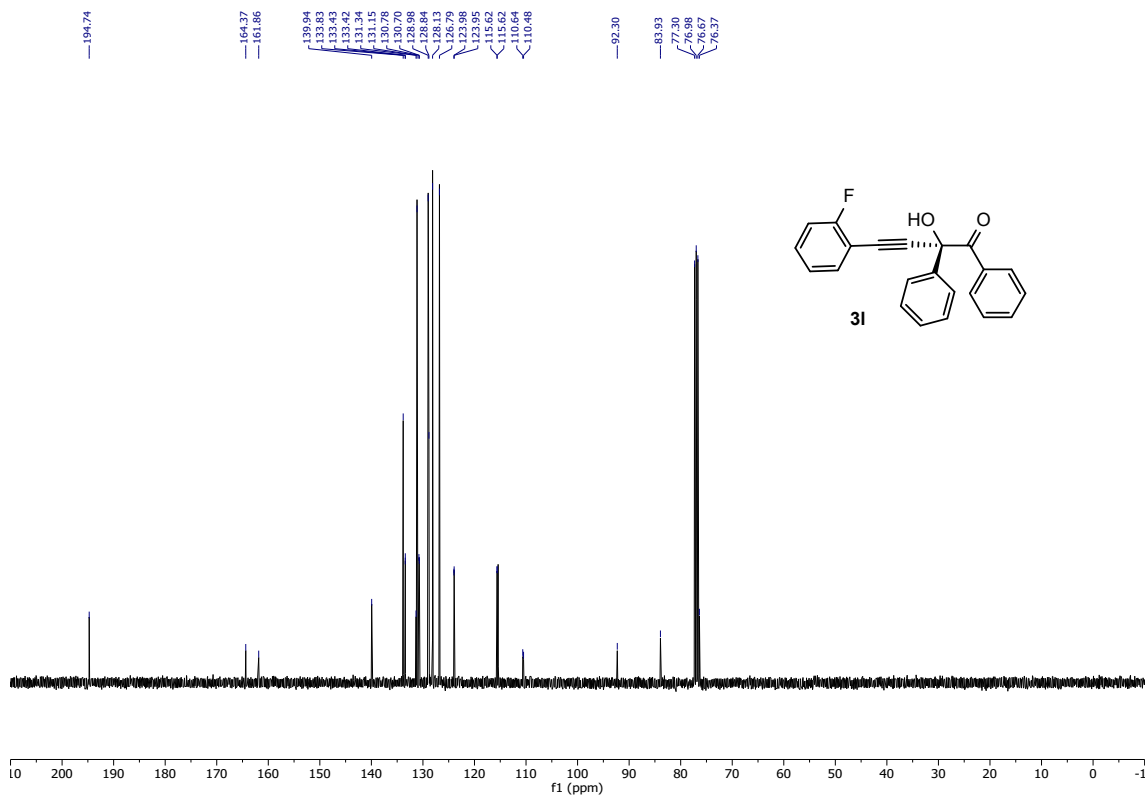

**(S)-2-hydroxy-1,2-diphenyldec-3-yn-1-one (3n)**

$^1\text{H-NMR}$  (400 MHz,  $\text{CDCl}_3$ )

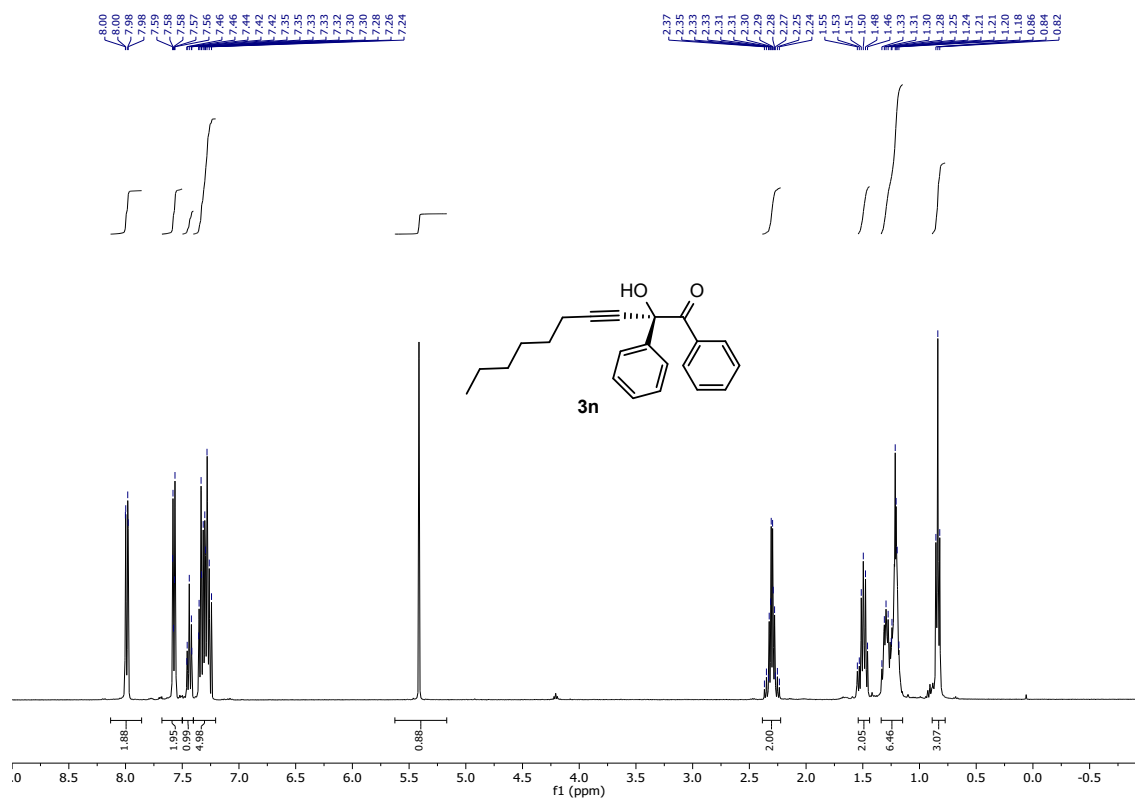

$^{13}\text{C-NMR}$  (100 MHz,  $\text{CDCl}_3$ )

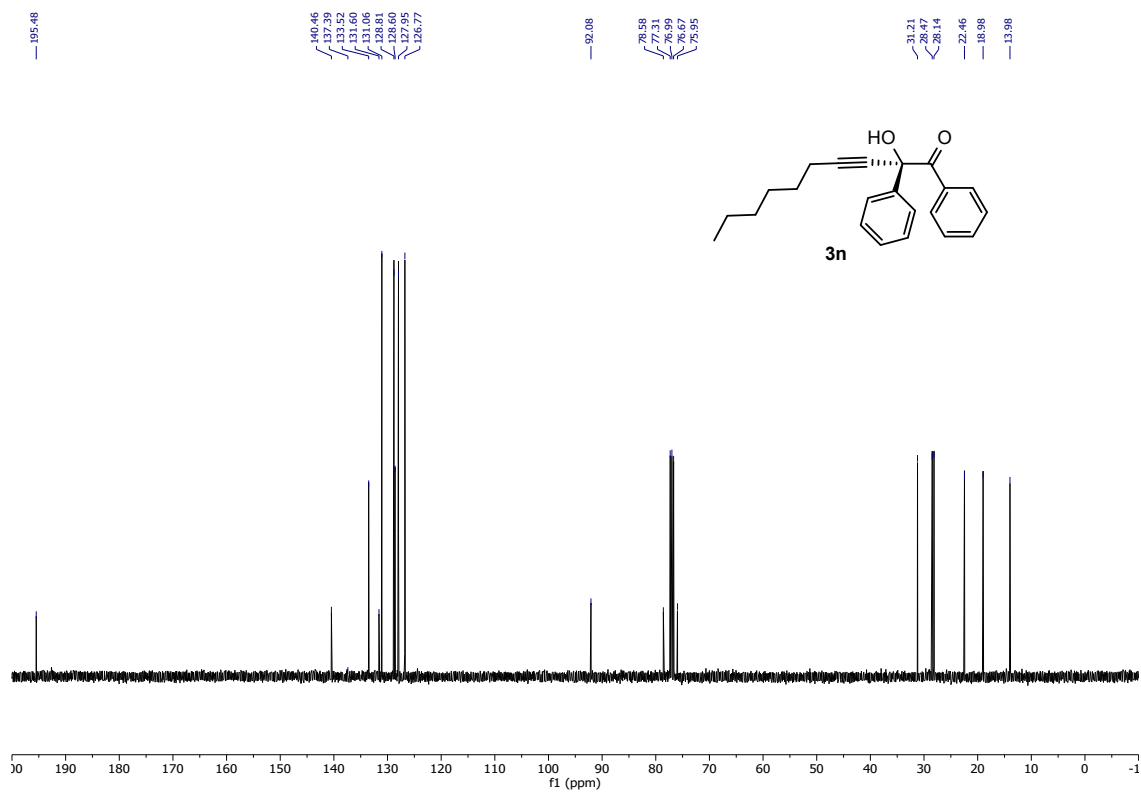

(S)-4-ethyl-4-hydroxy-6-(p-tolyl)hex-5-yn-3-one (4c)

<sup>1</sup>H-NMR (400 MHz, CDCl<sub>3</sub>)

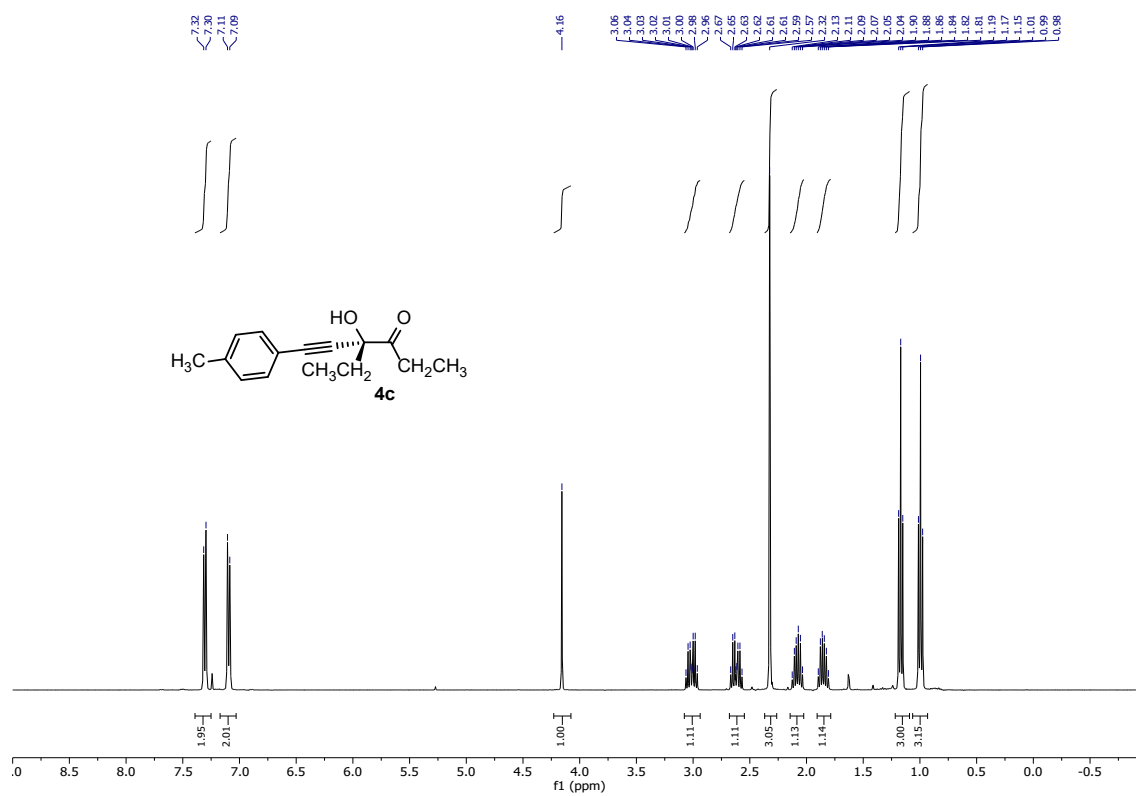

<sup>13</sup>C-NMR (100 MHz, CDCl<sub>3</sub>)

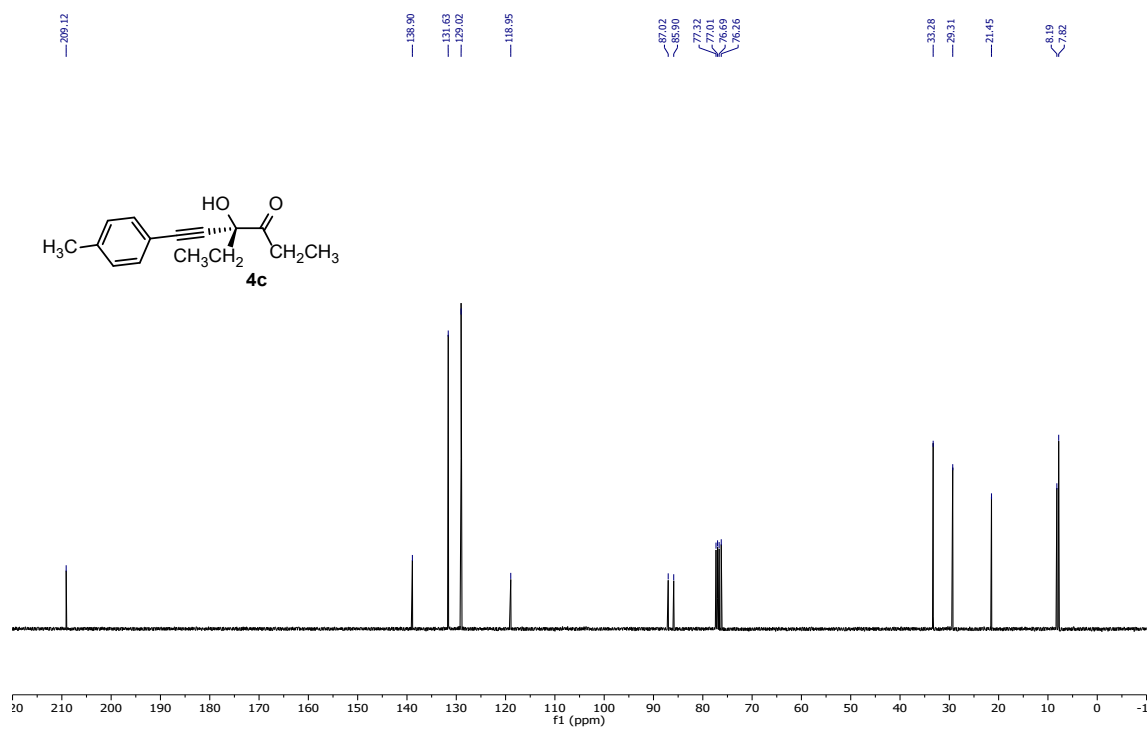

**(S)-6-(4-bromophenyl)-4-ethyl-4-hydroxyhex-5-yn-3-one (4d)**

$^1\text{H-NMR}$  (400 MHz,  $\text{CDCl}_3$ )

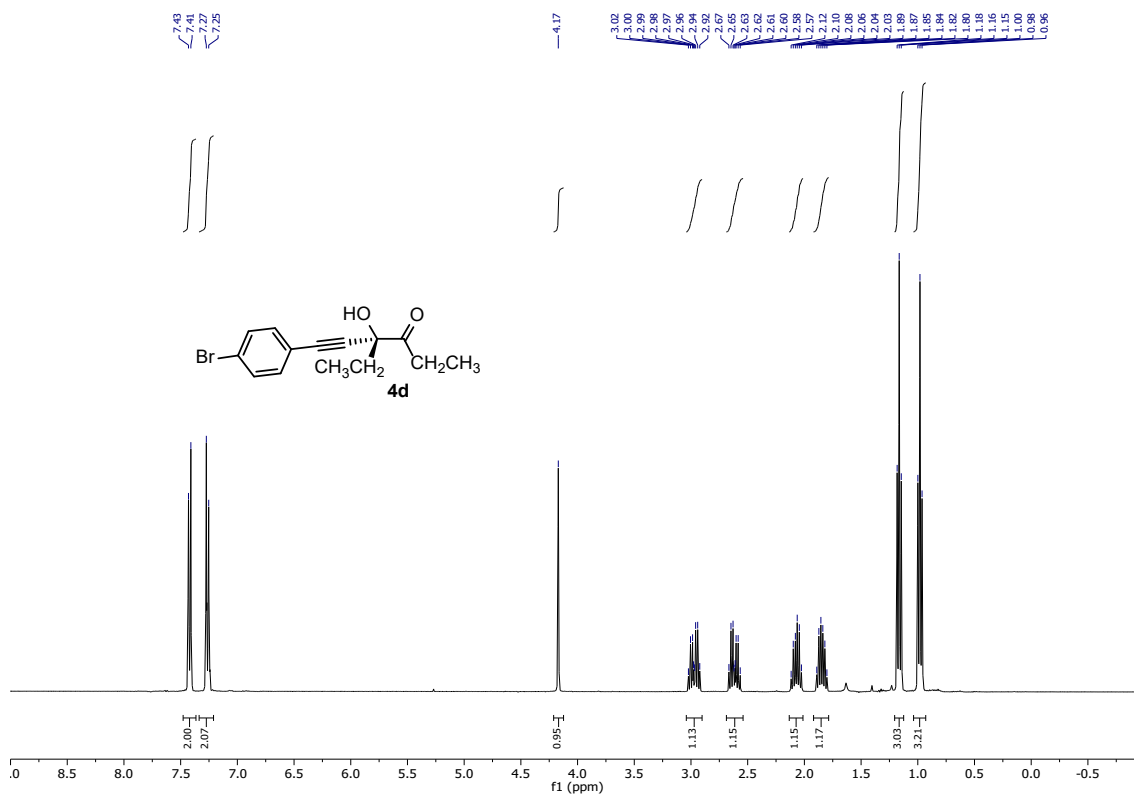

$^{13}\text{C-NMR}$  (100 MHz,  $\text{CDCl}_3$ )

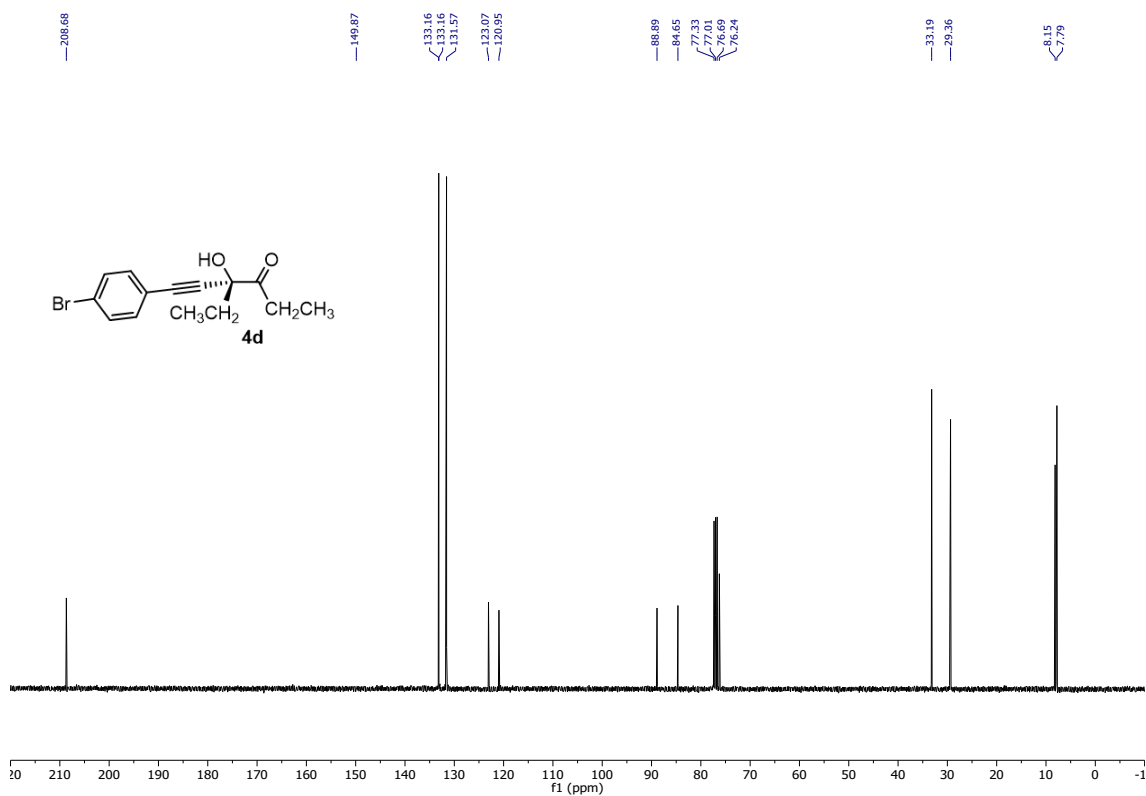



(S)-4-ethyl-6-(2-fluorophenyl)-4-hydroxyhex-5-yn-3-one (4e)

<sup>1</sup>H-NMR (400 MHz, CDCl<sub>3</sub>)

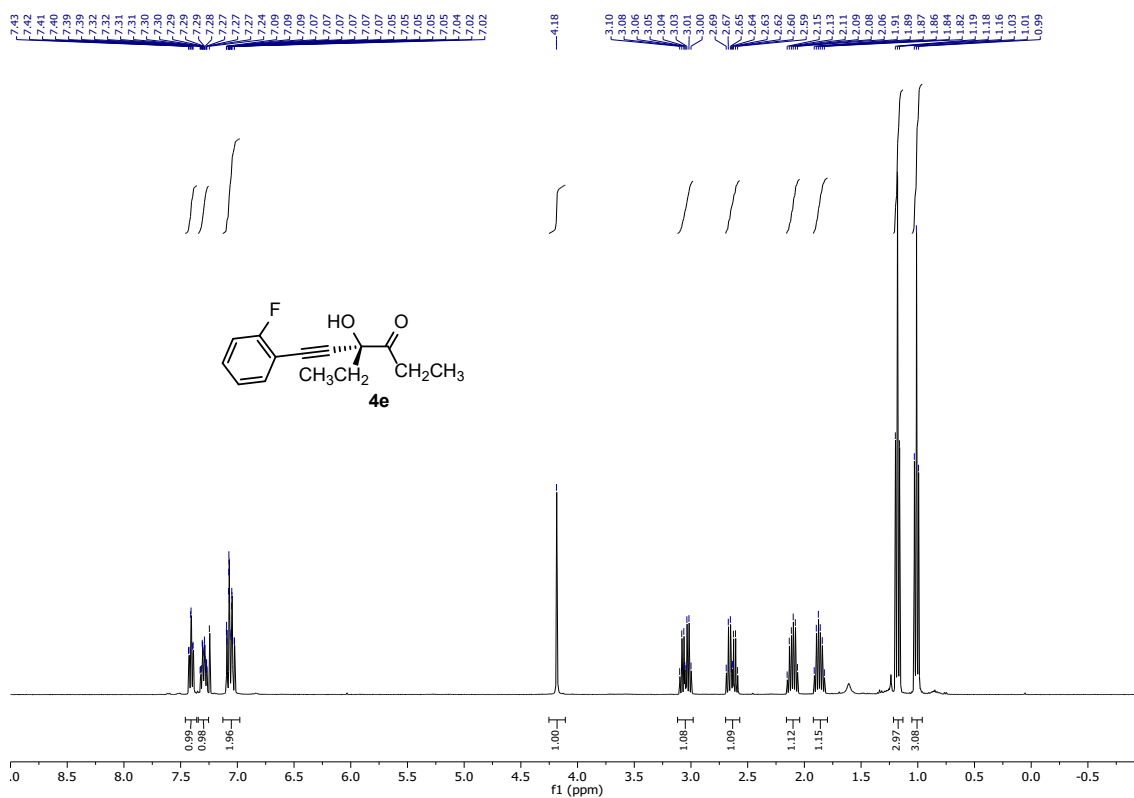

<sup>13</sup>C-NMR (100 MHz, CDCl<sub>3</sub>)

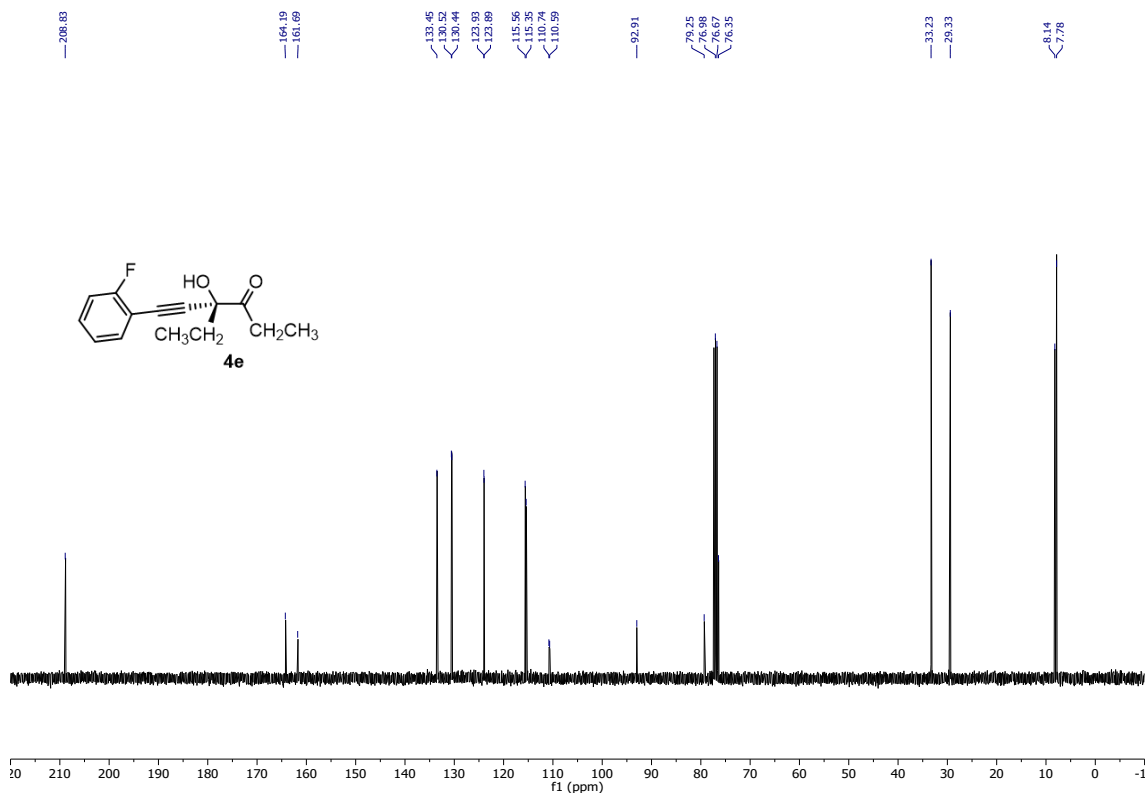

(S)-4-ethyl-4-hydroxy-6-(3-methoxyphenyl)hex-5-yn-3-one (4f)

<sup>1</sup>H-NMR (500 MHz, CDCl<sub>3</sub>)

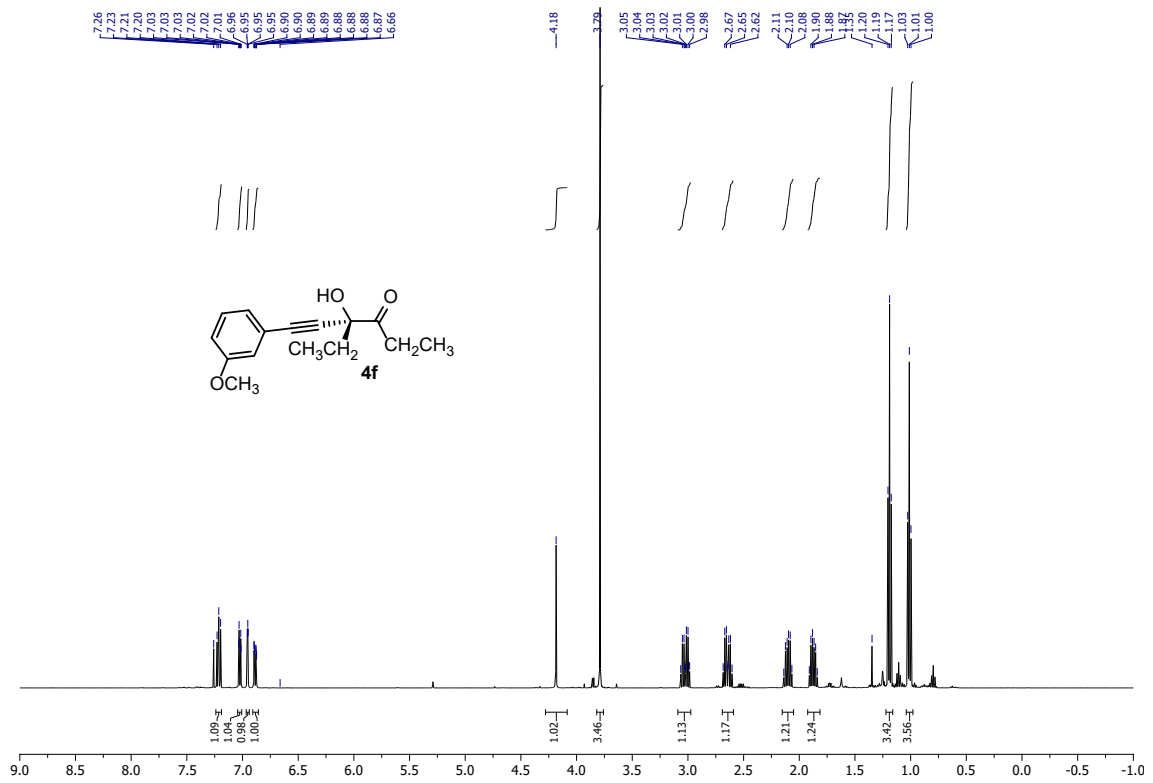

<sup>13</sup>C-NMR (126 MHz, CDCl<sub>3</sub>)

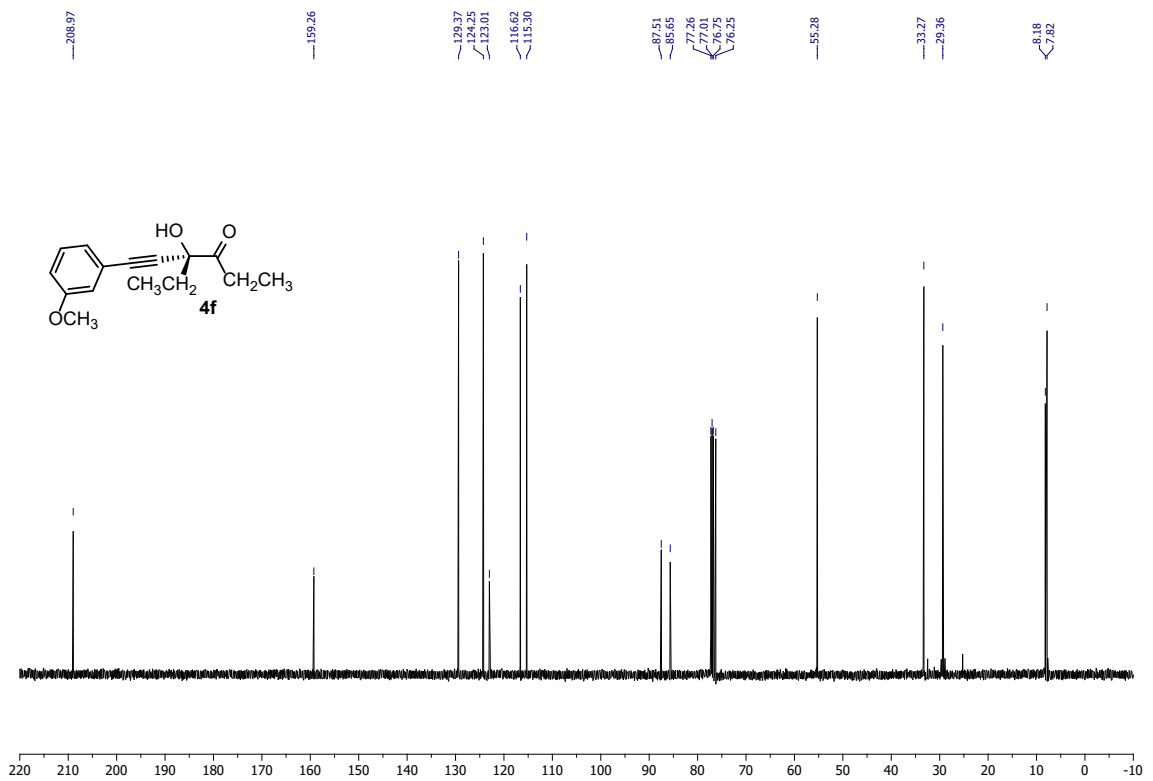

(S)-6-(3-chlorophenyl)-4-ethyl-4-hydroxyhex-5-yn-3-one (4g)

<sup>1</sup>H-NMR (500 MHz, CDCl<sub>3</sub>)

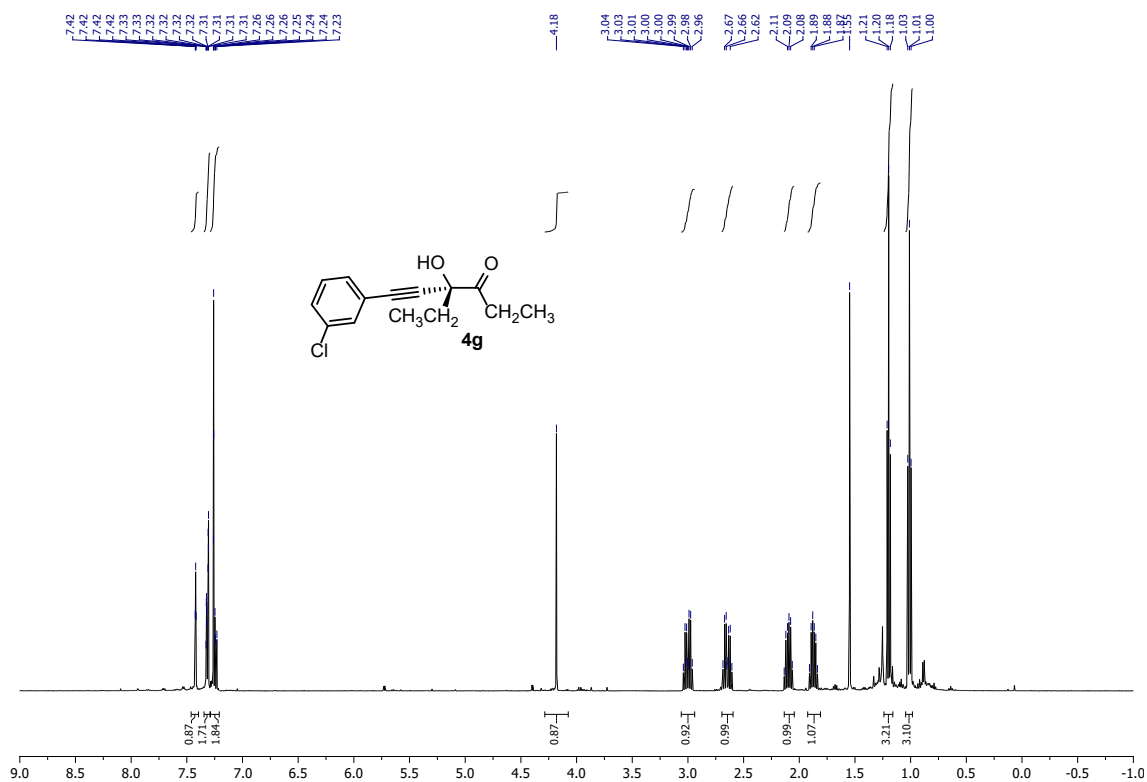

<sup>13</sup>C-NMR (126 MHz, CDCl<sub>3</sub>)

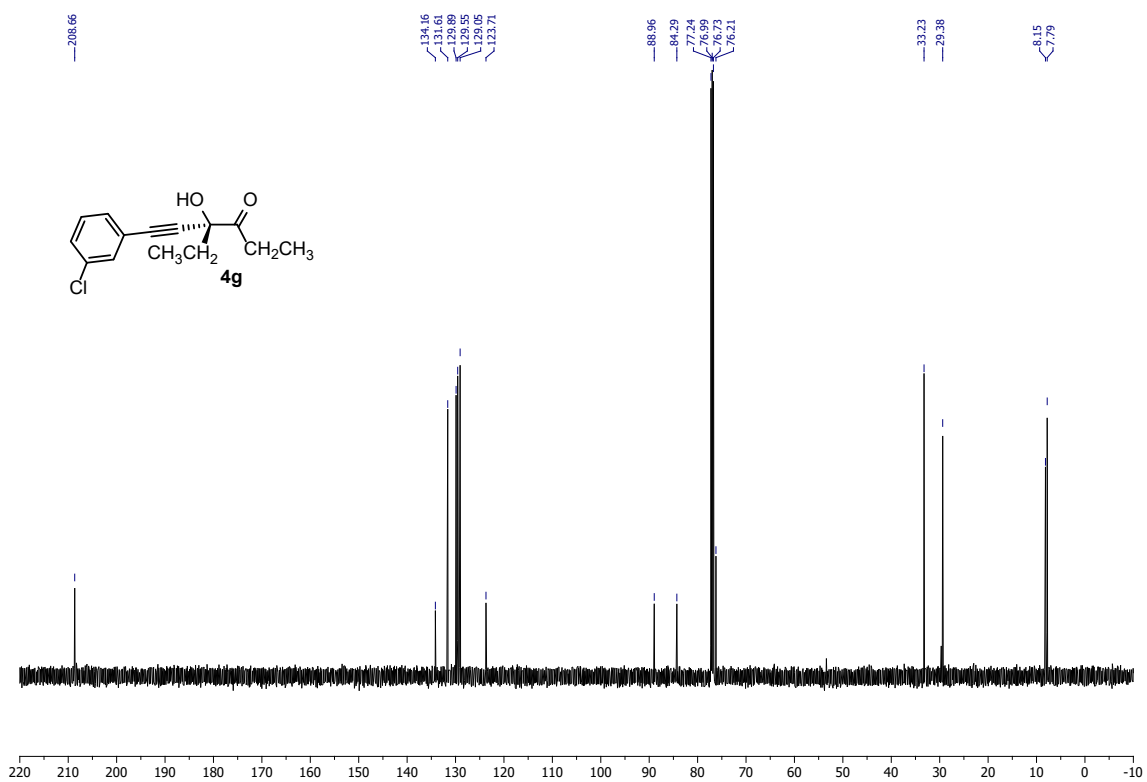

**(S)-4-ethyl-4-hydroxy-8-phenyloct-5-yn-3-one (4h).**

<sup>1</sup>H-NMR (400 MHz, CDCl<sub>3</sub>)

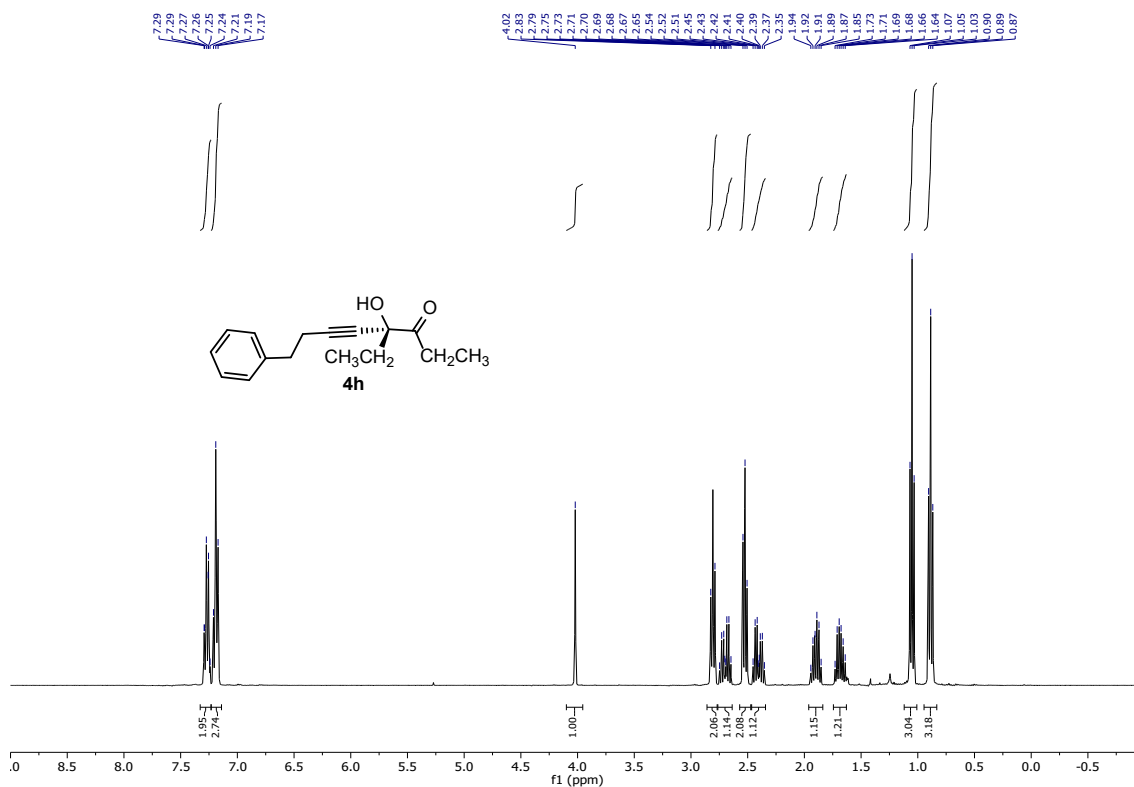

<sup>13</sup>C-NMR (100 MHz, CDCl<sub>3</sub>)

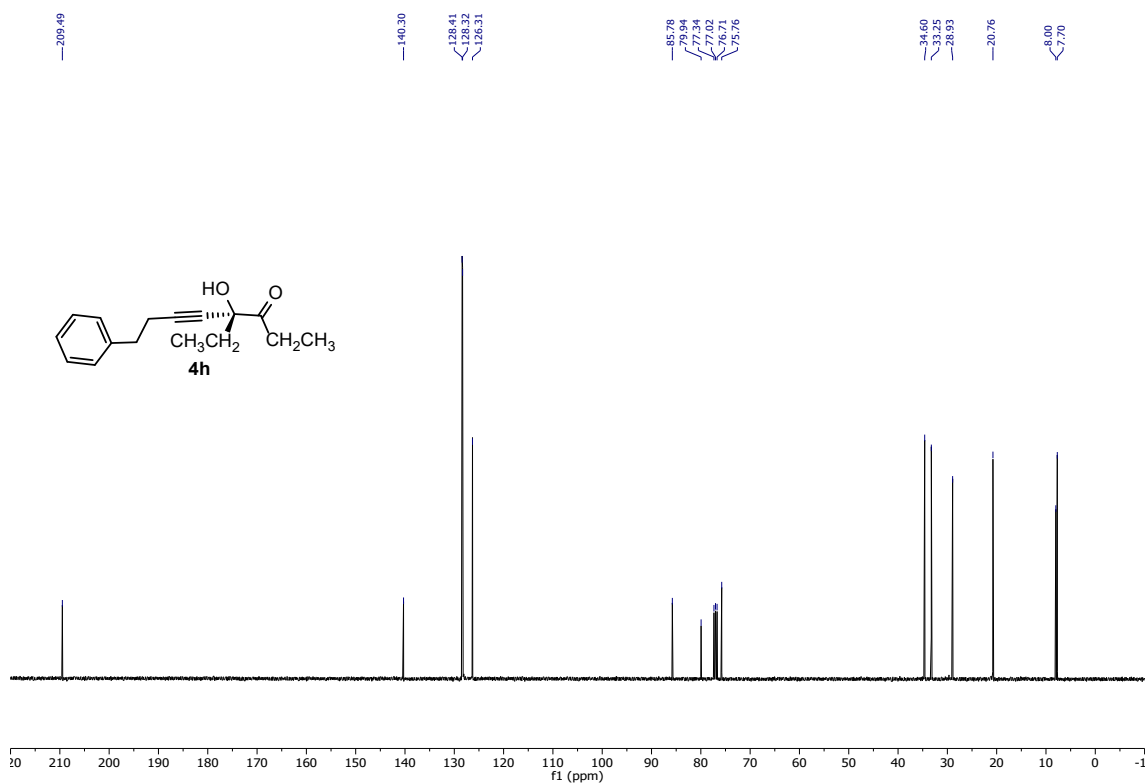

### (S)-4-Ethyl-4-hydroxydodec-5-yn-3-one (4i)

<sup>1</sup>H-NMR (400 MHz, CDCl<sub>3</sub>)

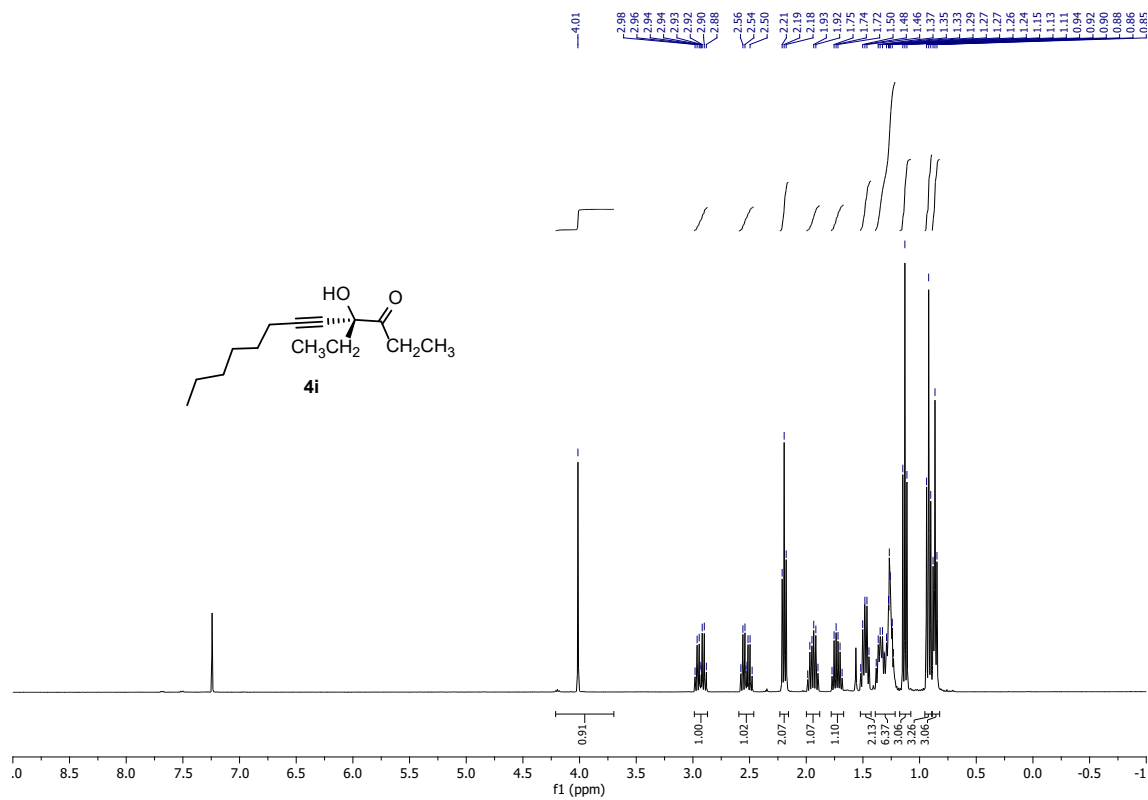

<sup>13</sup>C-NMR (100 MHz, CDCl<sub>3</sub>)

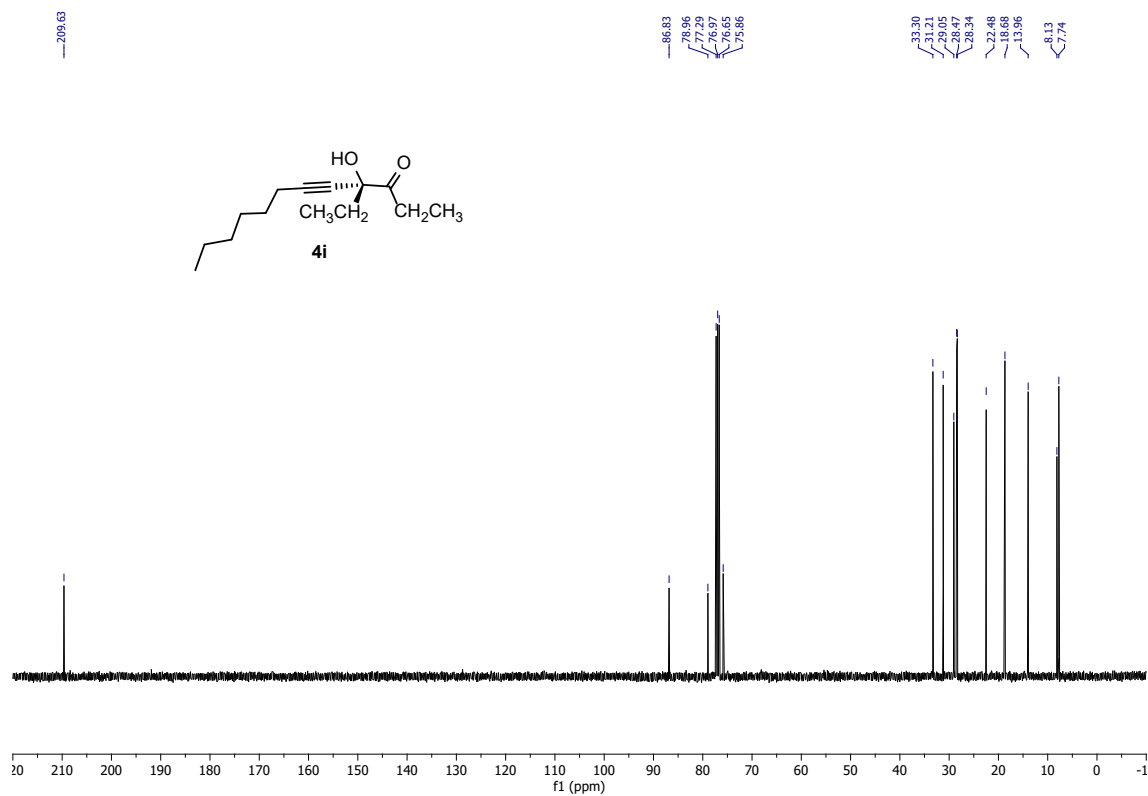

**(S)-4-ethyl-4-hydroxy-6-(trimethylsilyl)hex-5-yn-3-one (4j)**

<sup>1</sup>H-NMR (400 MHz, CDCl<sub>3</sub>)

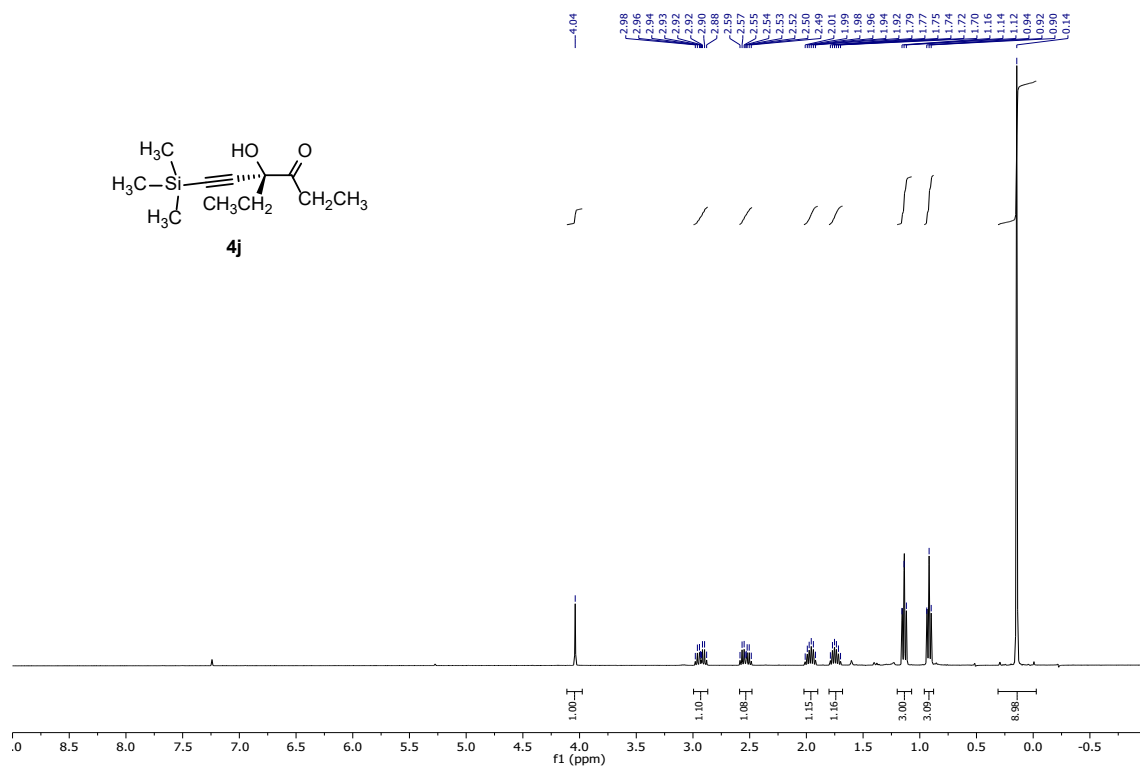

<sup>13</sup>C-NMR (100 MHz, CDCl<sub>3</sub>)

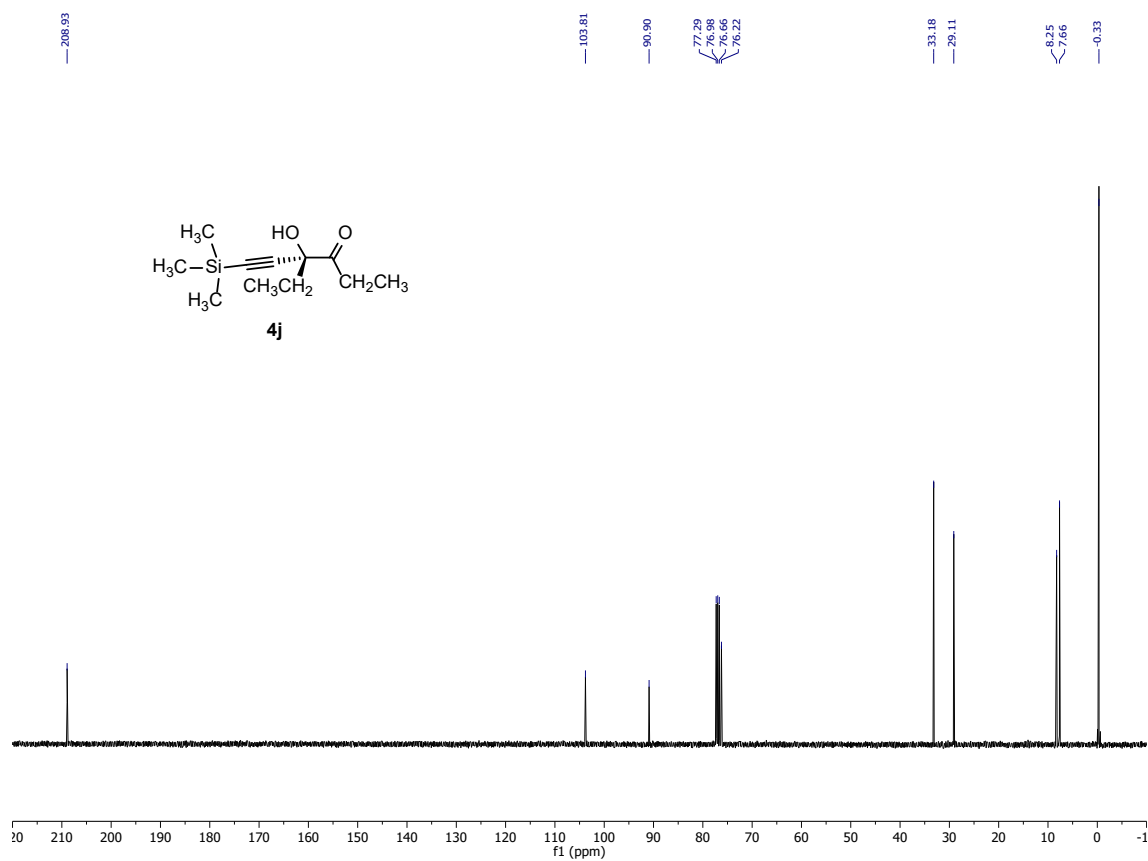

(S)-7-((tert-butyldimethylsilyl)oxy)-4-ethyl-4-hydroxyhept-5-yn-3-one (4k)

<sup>1</sup>H-NMR (400 MHz, CDCl<sub>3</sub>)

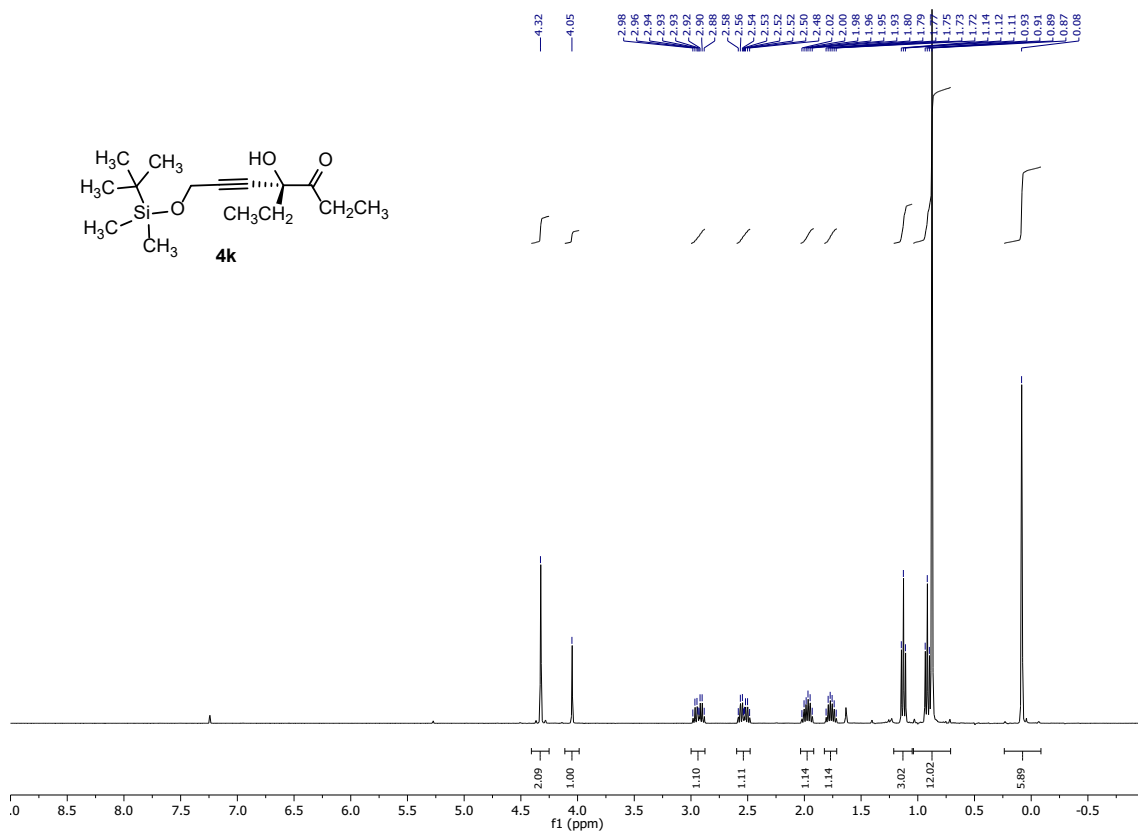

<sup>13</sup>C-NMR (100 MHz, CDCl<sub>3</sub>)

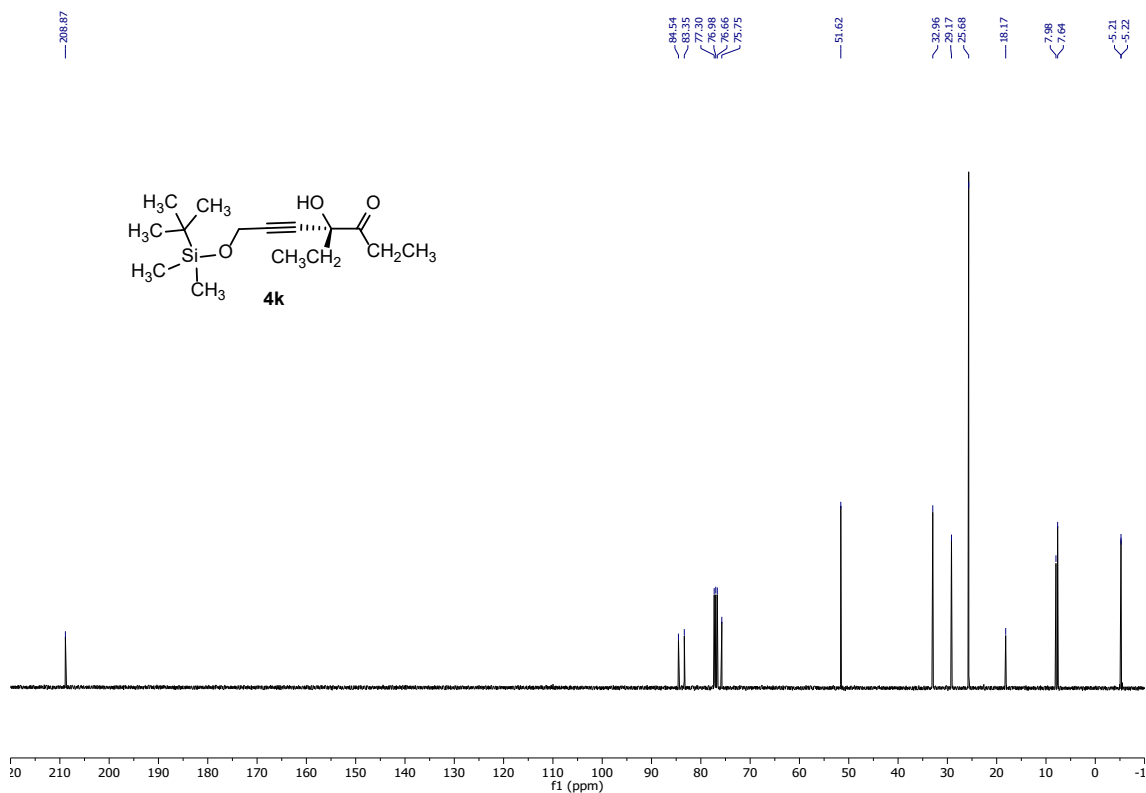

**(S)-2-hydroxy-1-(4-methoxyphenyl)-4-phenyl-2-(4-(trifluoromethyl)phenyl)but-3-yn-1-one (6b)**

$^1\text{H-NMR}$  (500 MHz,  $\text{CDCl}_3$ )

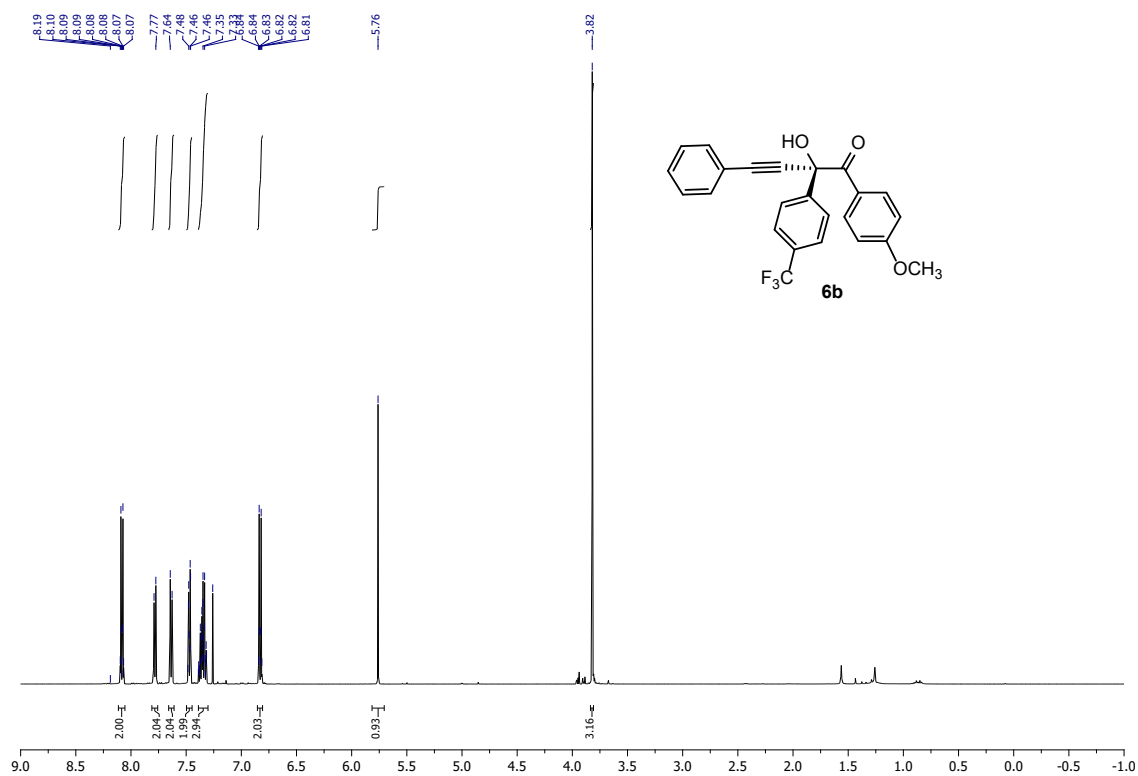

$^{13}\text{C-NMR}$  (126 MHz,  $\text{CDCl}_3$ )

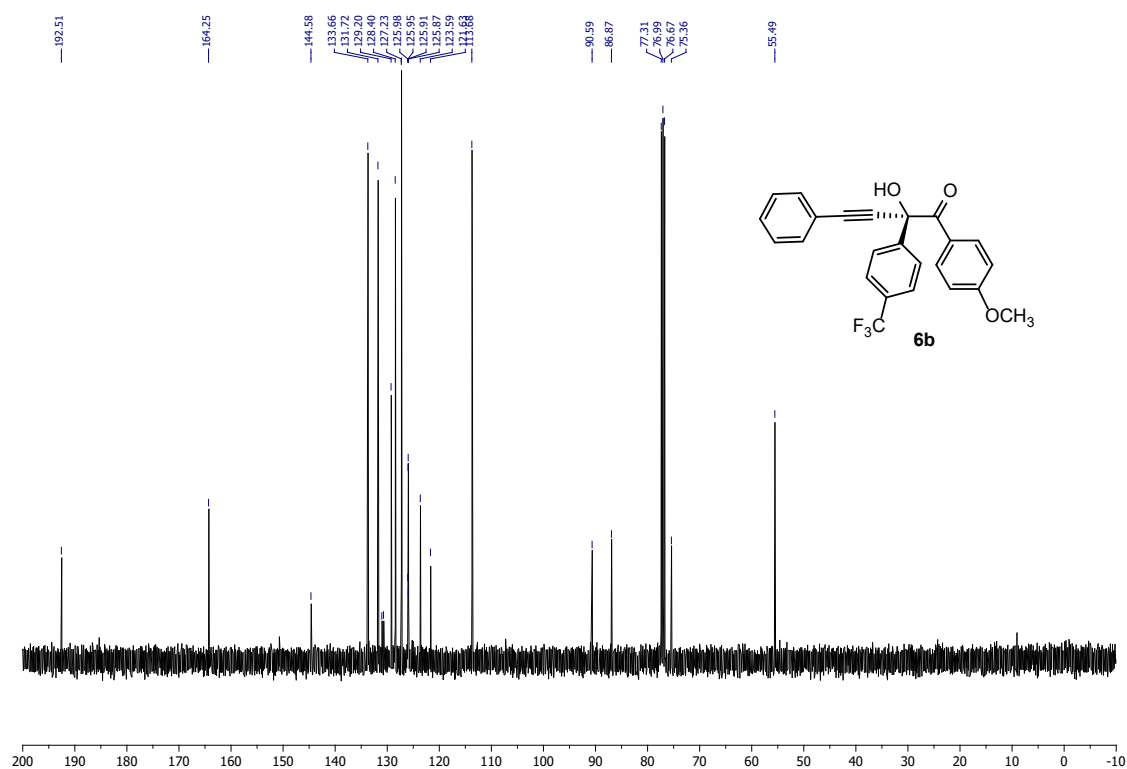



**(R)-2-(2-chlorophenyl)-1-(3,4-dimethoxyphenyl)-2-hydroxy-4-(p-tolyl)but-3-yn-1-one (6d)**

$^1\text{H-NMR}$  (400 MHz,  $\text{CDCl}_3$ )

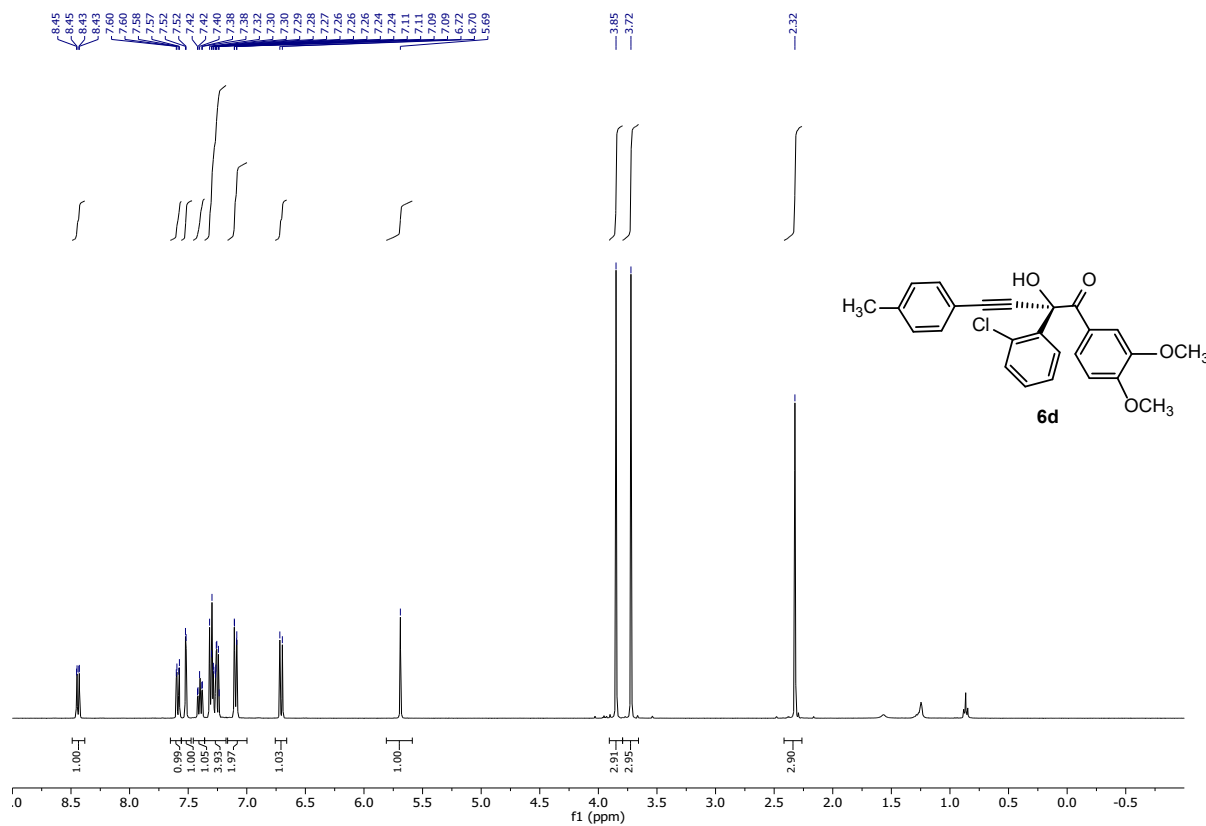

$^{13}\text{C-NMR}$  (100 MHz,  $\text{CDCl}_3$ )

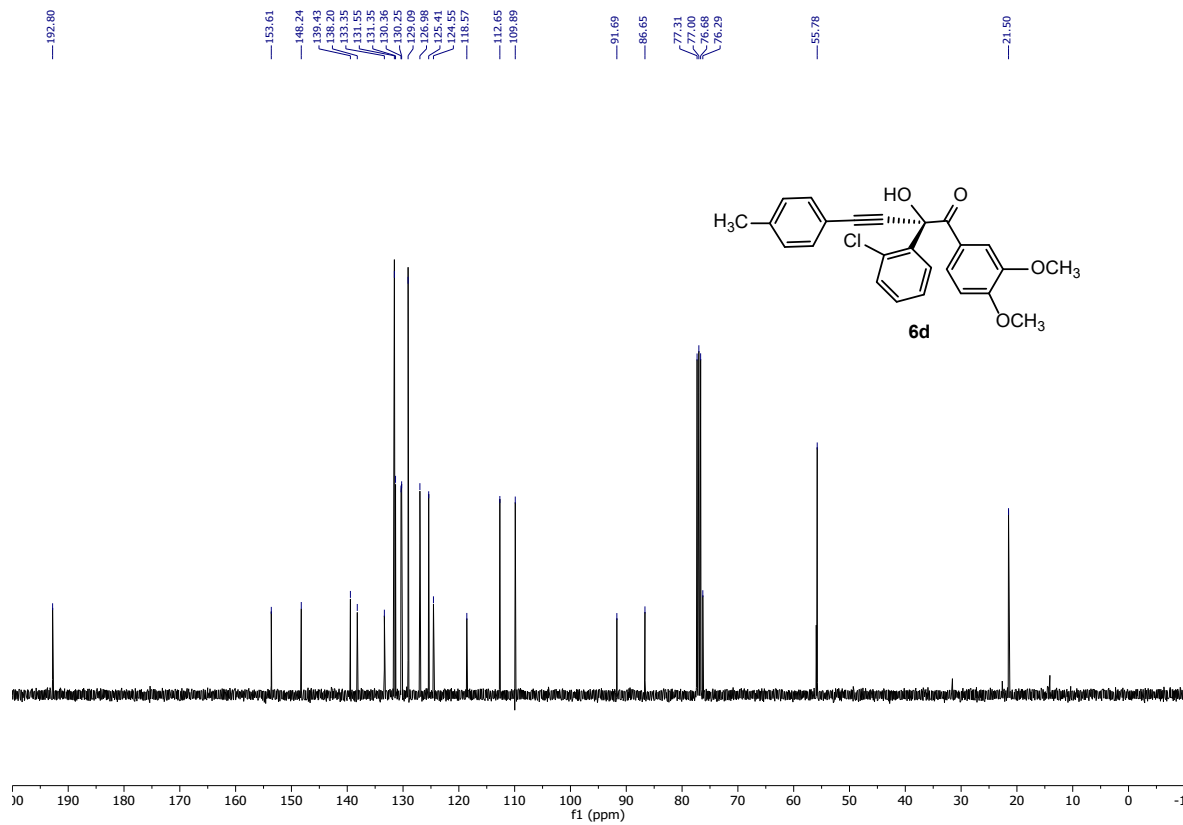

**(R)-4-(4-bromophenyl)-2-(2-chlorophenyl)-1-(3,4-dimethoxyphenyl)-2-hydroxybut-3-yn-1-one (6e)**

$^1\text{H-NMR}$  (400 MHz,  $\text{CDCl}_3$ )

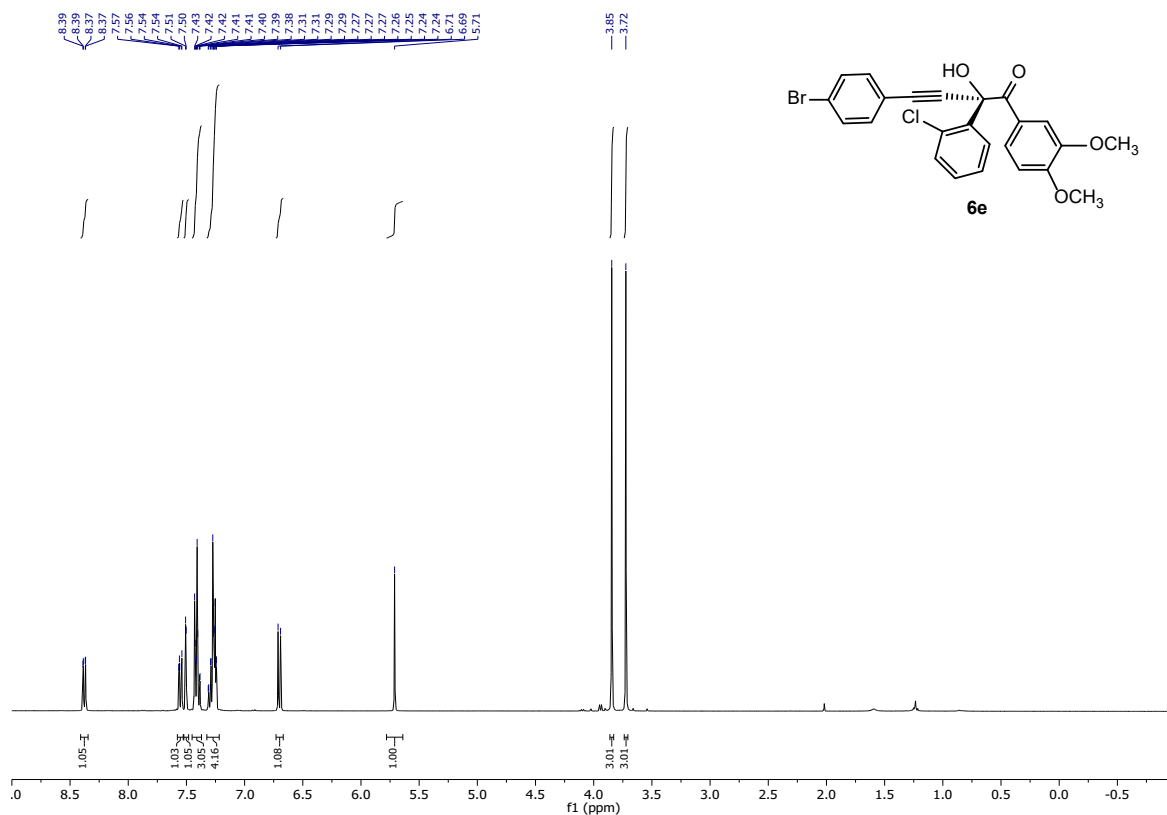

$^{13}\text{C-NMR}$  (100 MHz,  $\text{CDCl}_3$ )

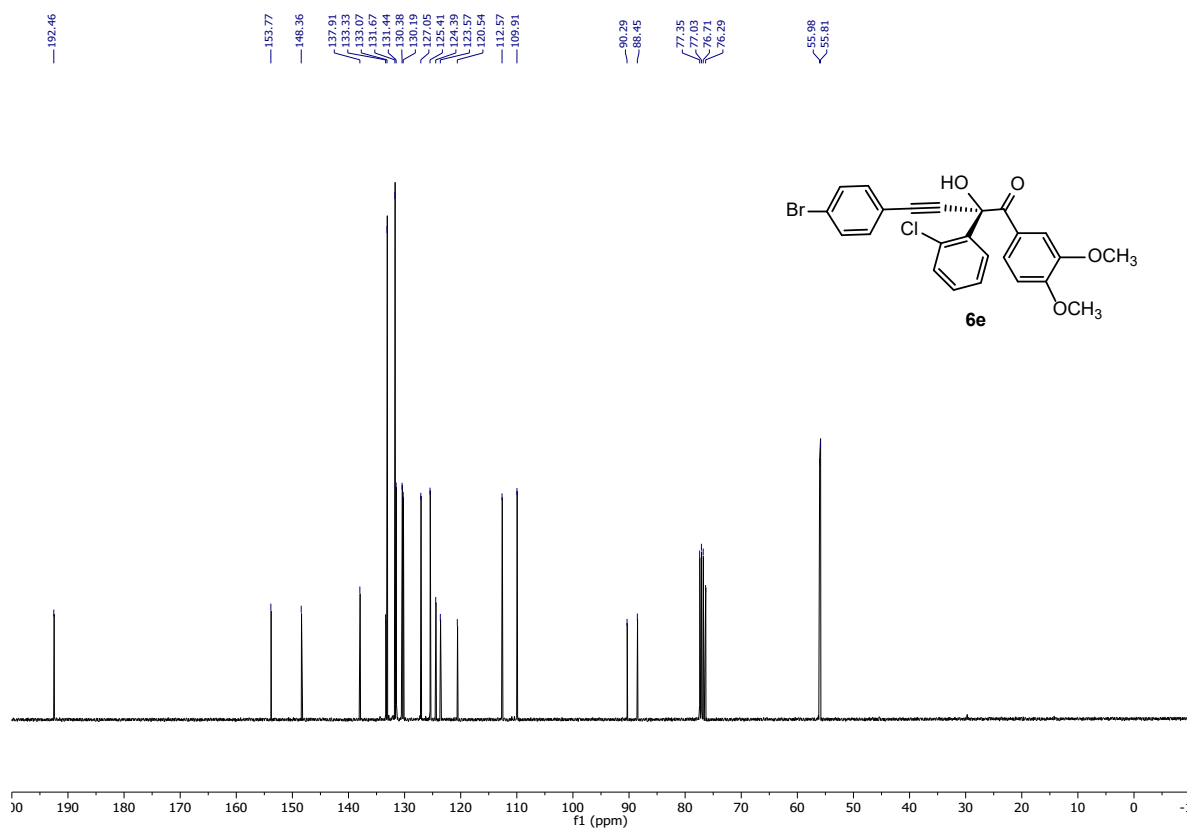

**(R)-2-(2-chlorophenyl)-1-(3,4-dimethoxyphenyl)-2-hydroxydec-3-yn-1-one (6f)**

<sup>1</sup>H-NMR (500 MHz, CDCl<sub>3</sub>)

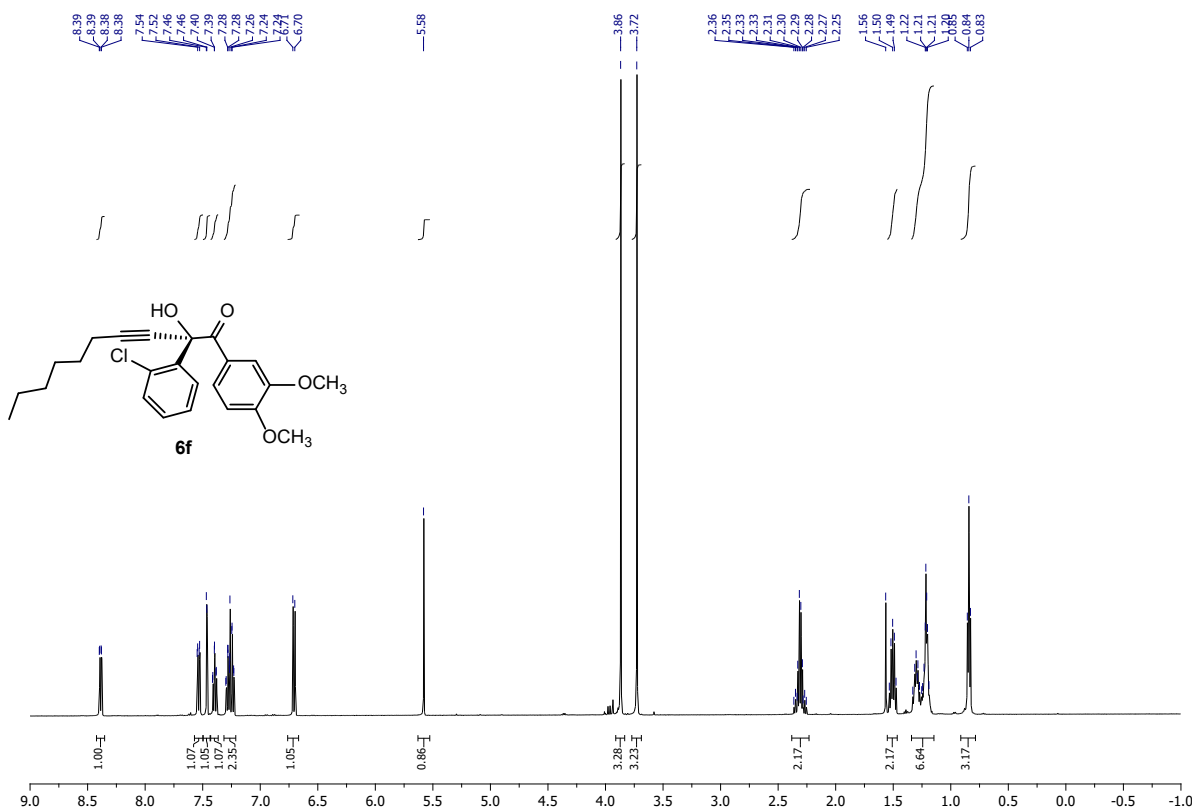

<sup>13</sup>C-NMR (126 MHz, CDCl<sub>3</sub>)

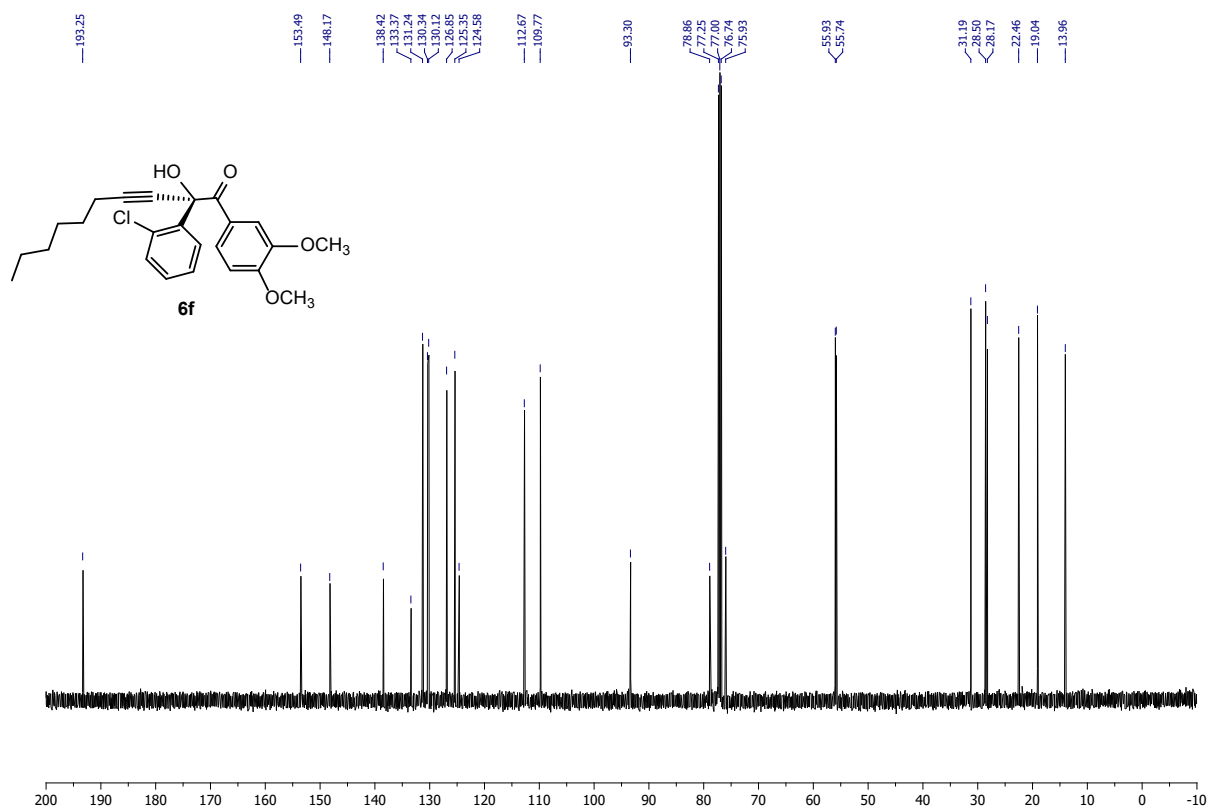

**(R)-2-(2,4-dichlorophenyl)-2-hydroxy-1-(4-methoxyphenyl)-4-phenylbut-3-yn-1-one (6g)**

<sup>1</sup>H-NMR (500 MHz, CDCl<sub>3</sub>)

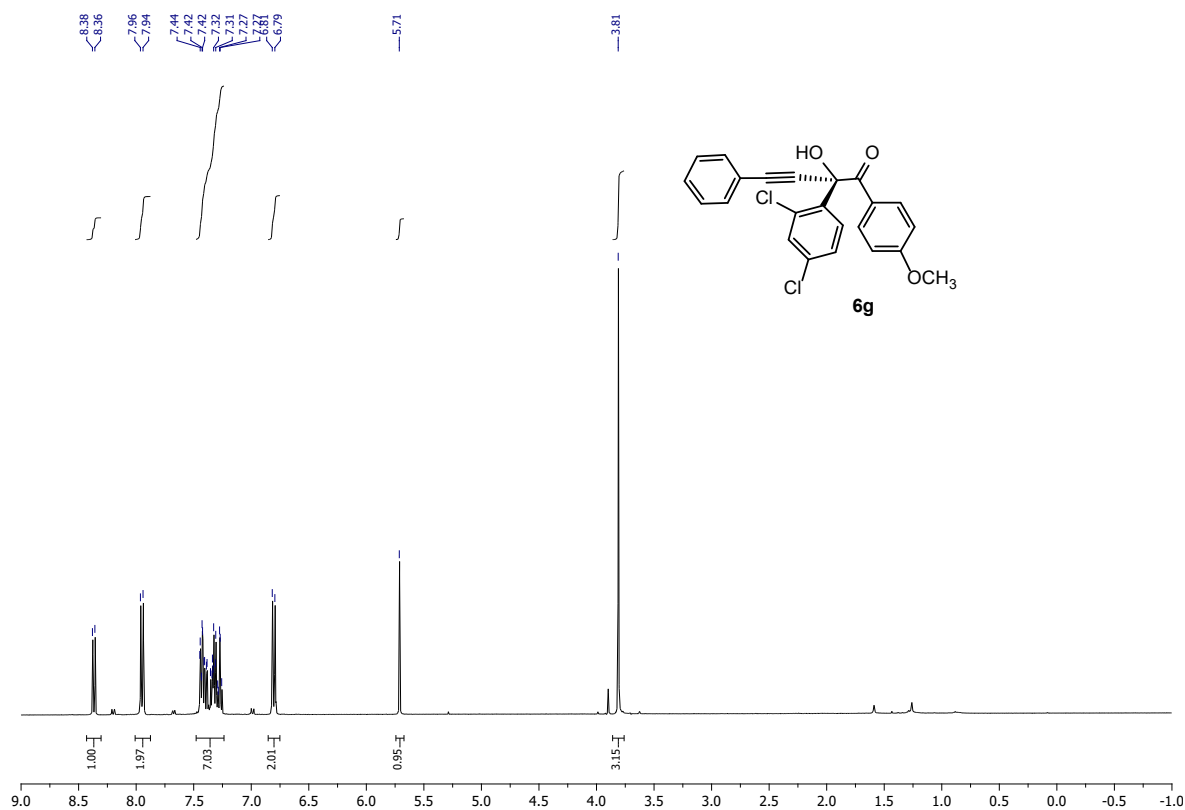

<sup>13</sup>C-NMR (126 MHz, CDCl<sub>3</sub>)

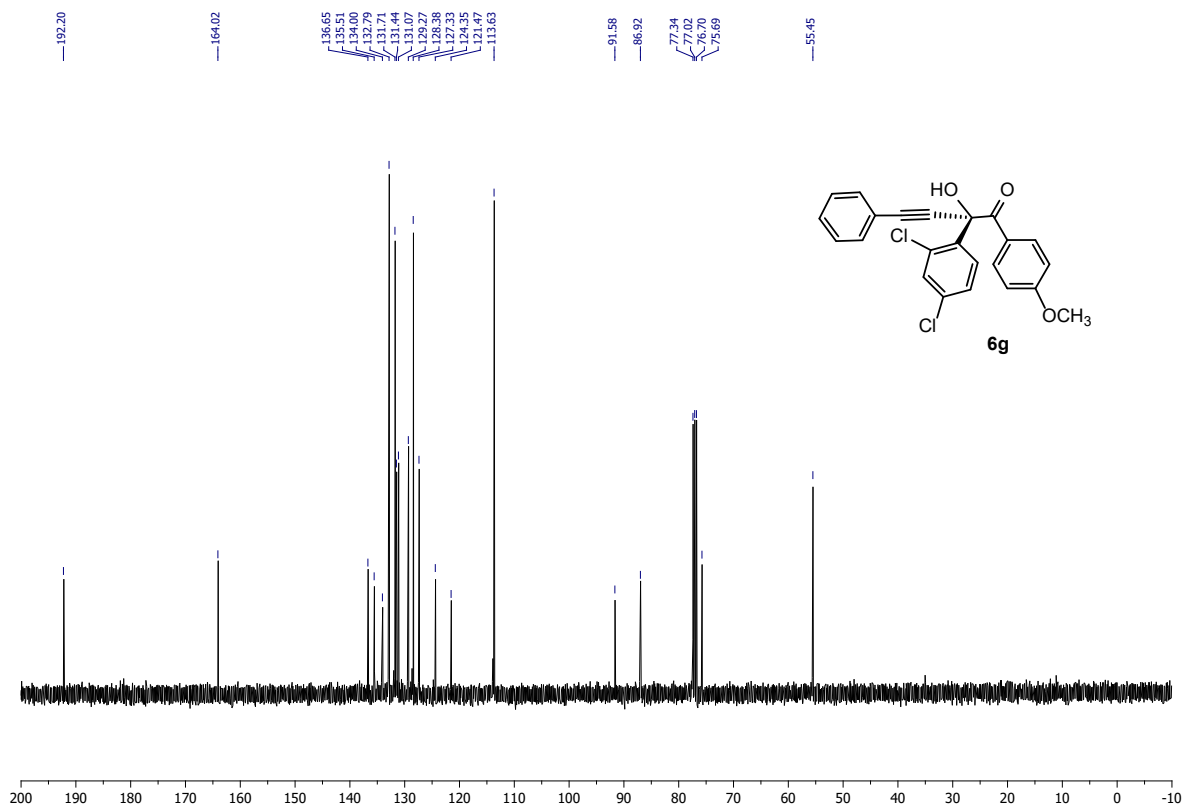

**(R)-2-(2,4-dichlorophenyl)-2-hydroxy-1-(4-methoxyphenyl)-4-(p-tolyl)but-3-yn-1-one (6h)**

$^1\text{H-NMR}$  (500 MHz,  $\text{CDCl}_3$ )

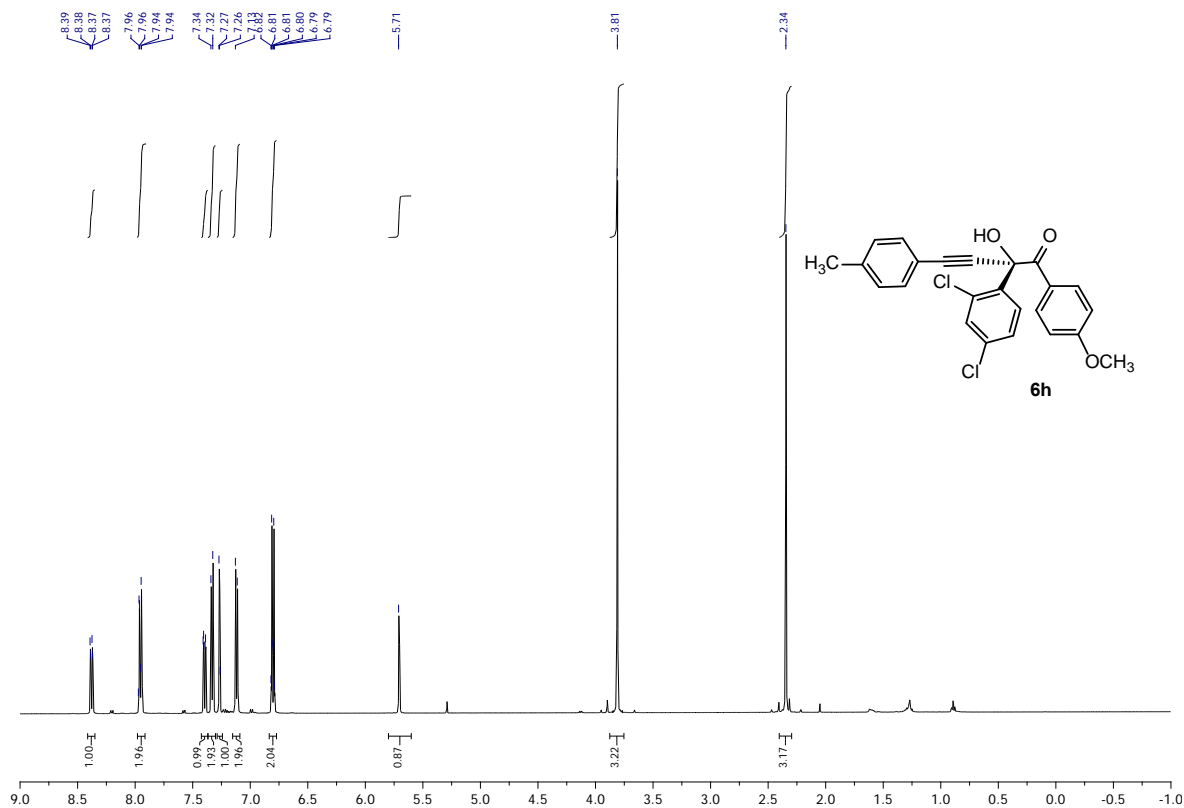

$^{13}\text{C-NMR}$  (126 MHz,  $\text{CDCl}_3$ )

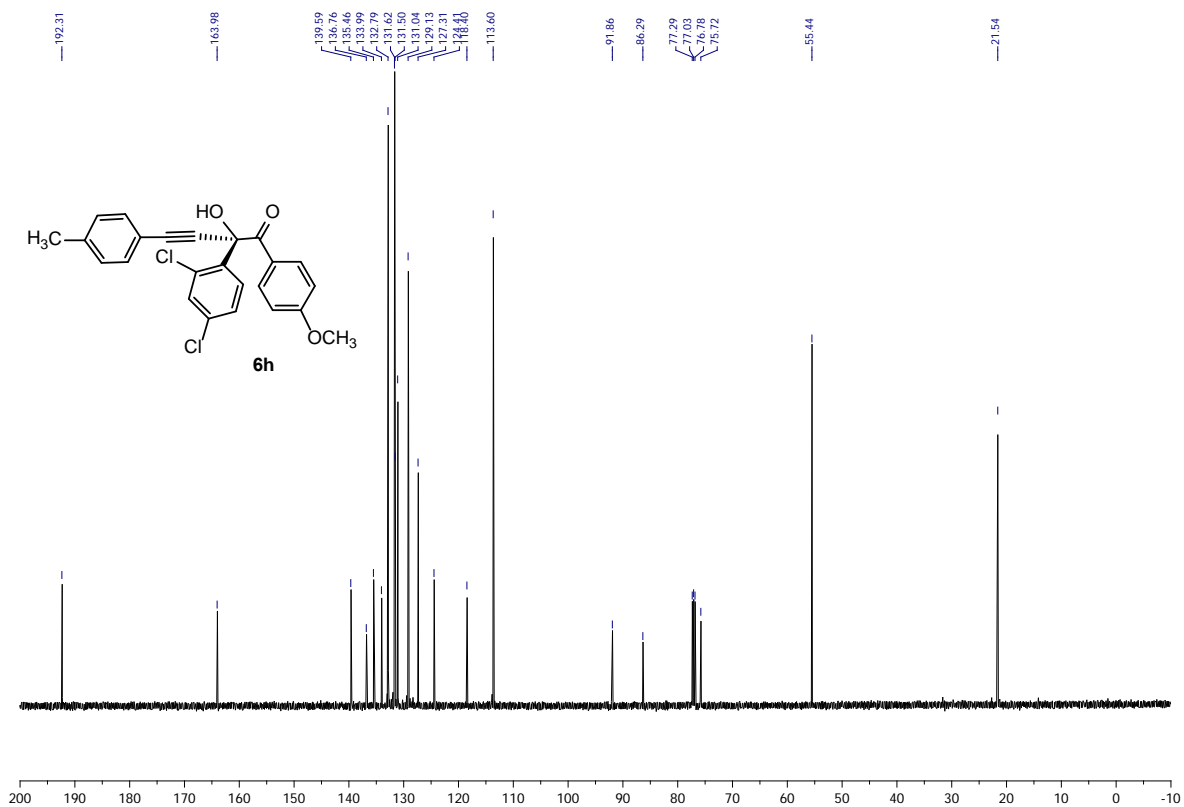

**(R)-4-(4-bromophenyl)-2-(2,4-dichlorophenyl)-2-hydroxy-1-(4-methoxyphenyl)but-3-yn-1-one (6i)**

<sup>1</sup>H-NMR (500 MHz, CDCl<sub>3</sub>)

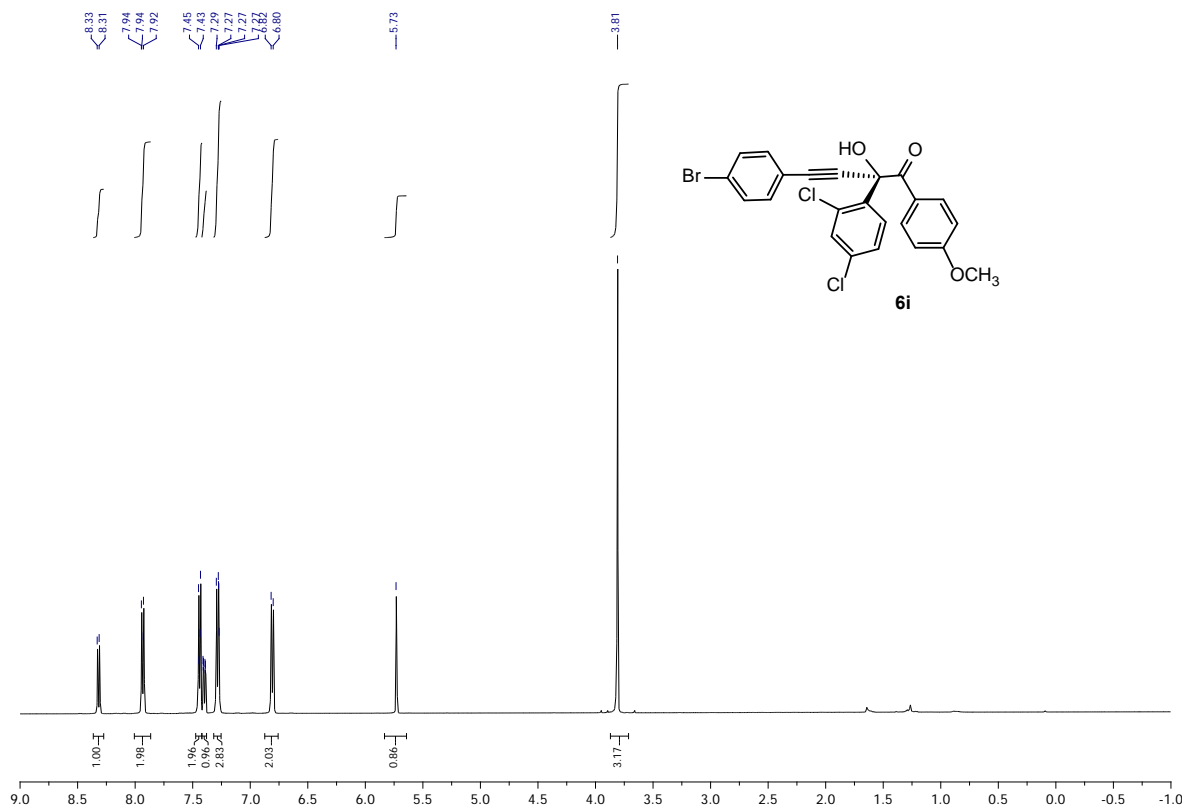

<sup>13</sup>C-NMR (126 MHz, CDCl<sub>3</sub>)

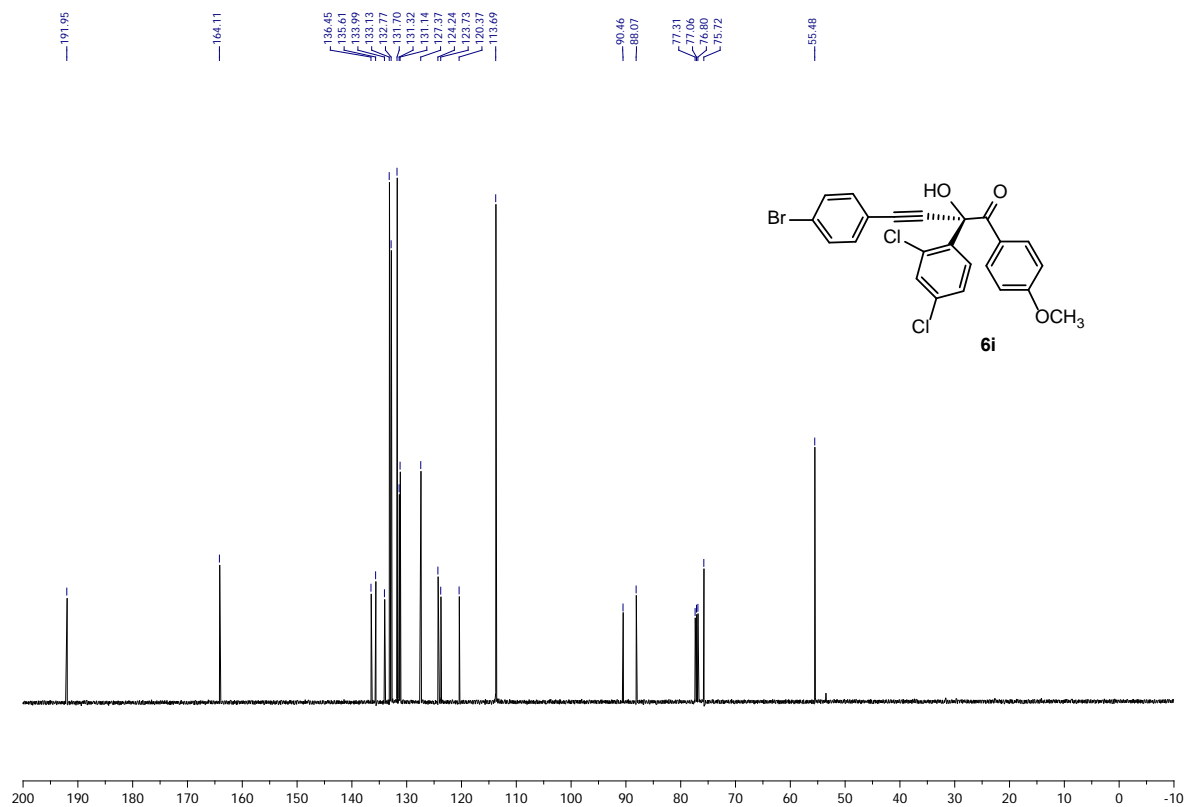

**(R)-4-(2-chlorophenyl)-4-hydroxy-2-methyl-6-phenylhex-5-yn-3-one (6k)**

<sup>1</sup>H-NMR (500 MHz, CDCl<sub>3</sub>)

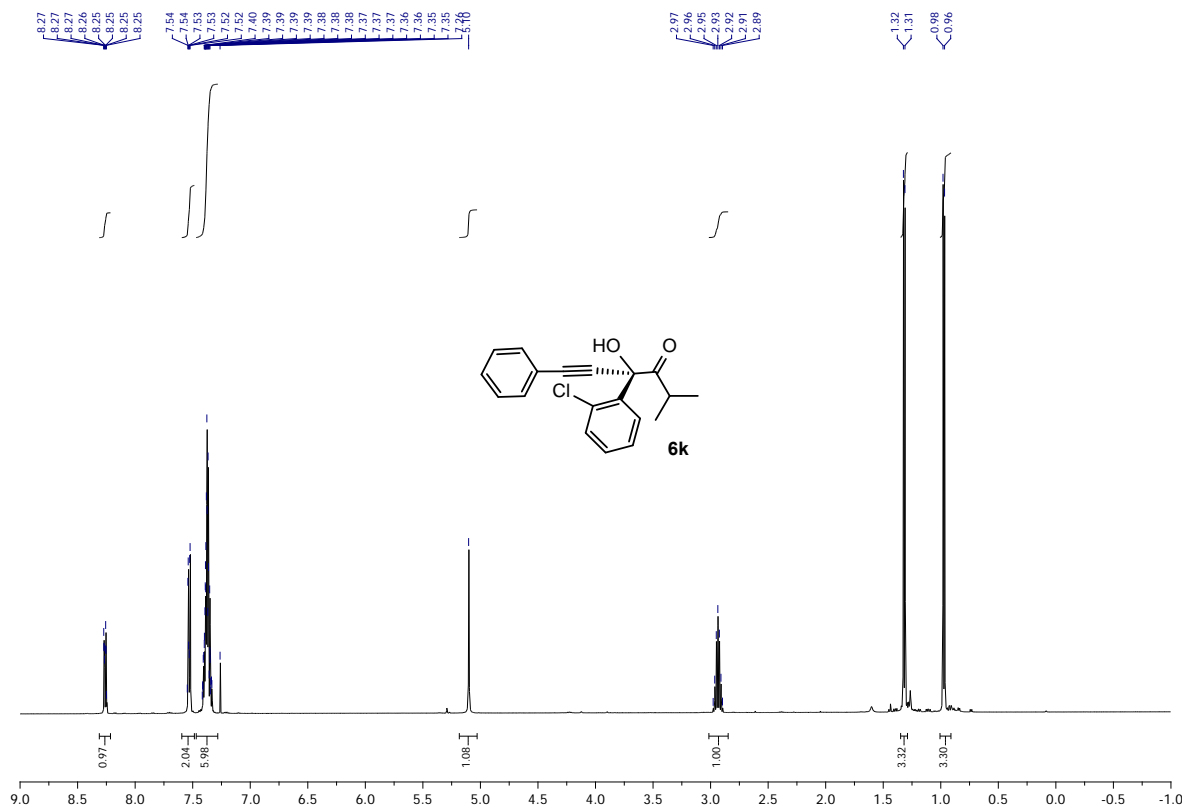

<sup>13</sup>C-NMR (126 MHz, CDCl<sub>3</sub>)

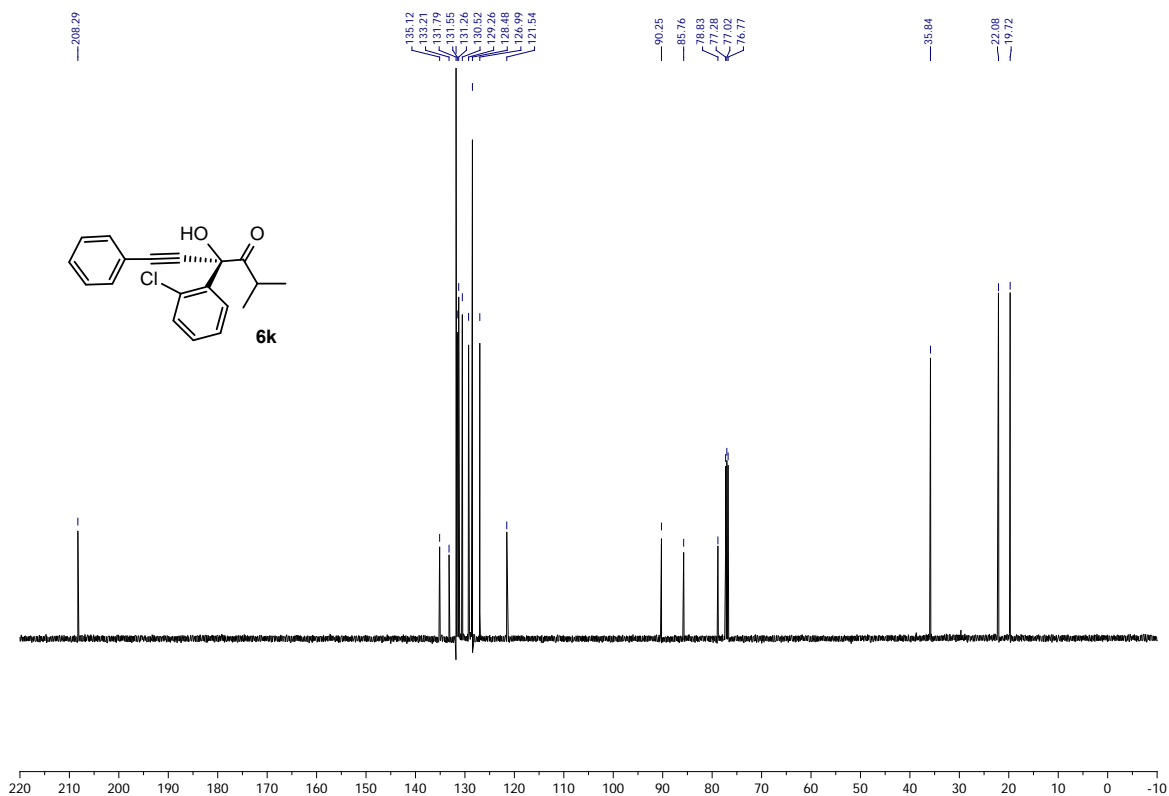

## HPLC Data

### (S)-2-hydroxy-1,2-diphenyl-4-(p-tolyl)but-3-yn-1-one (3j)

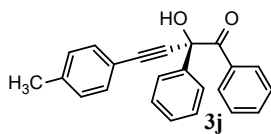

Lux-Amylose-1, hexane:isopropanol = 90:10, 1 mL min<sup>-1</sup>,  $\lambda$  = 254 nm

### Racemic Compound

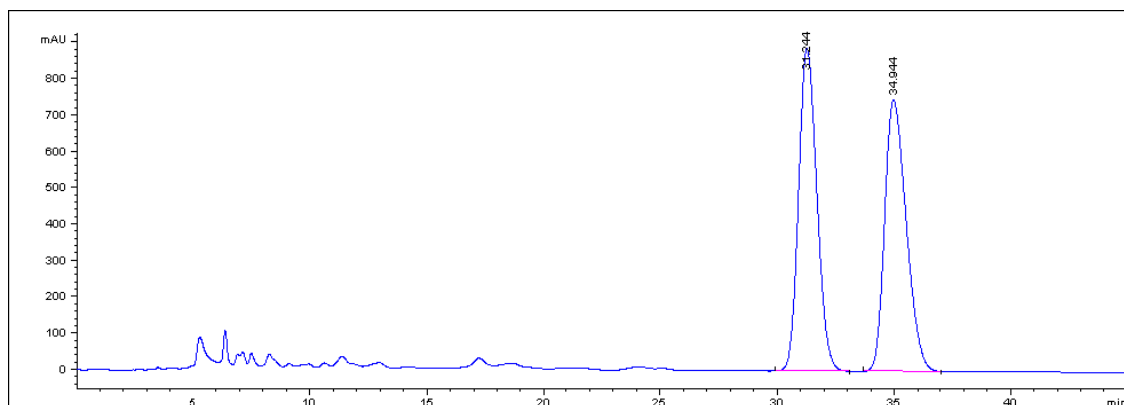

| # | Time   | Area    | Height | Width  | Area%  | Symmetry |
|---|--------|---------|--------|--------|--------|----------|
| 1 | 31.244 | 48180.4 | 887.4  | 0.8158 | 50.153 | 0.8      |
| 2 | 34.944 | 47887   | 747.5  | 0.9298 | 49.847 | 0.677    |

### Asymmetric reaction: 95:5 er

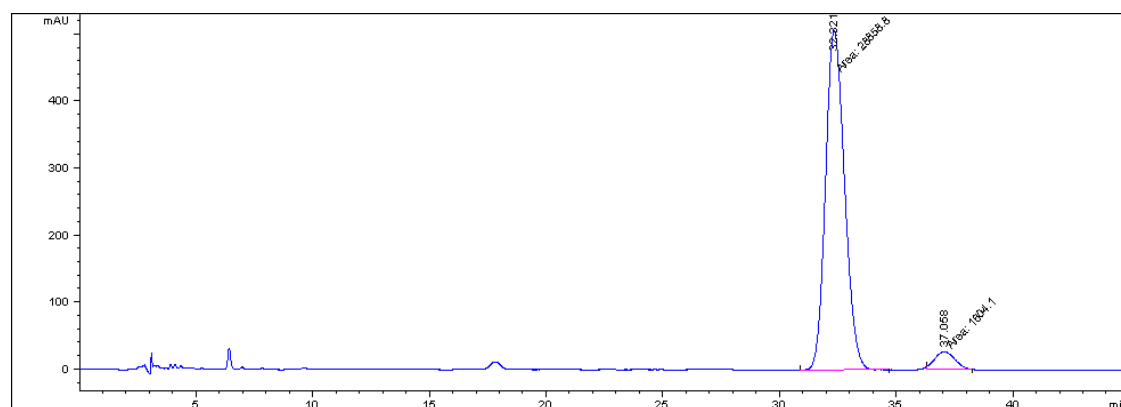

| # | Time   | Area    | Height | Width  | Area%  | Symmetry |
|---|--------|---------|--------|--------|--------|----------|
| 1 | 32.321 | 28858.8 | 507.2  | 0.9484 | 94.734 | 0.809    |
| 2 | 37.058 | 1604.1  | 26.6   | 1.0053 | 5.266  | 0.969    |



**(S)-4-(4-bromophenyl)-2-hydroxy-1,2-diphenylbut-3-yn-1-one (3k)**

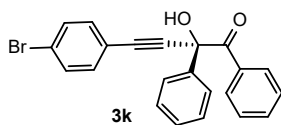

Chiralcel OD-H hexano:2-propanol = 90:10, 1.0 mL min<sup>-1</sup>,  $\lambda = 254$  nm

Racemic Compound

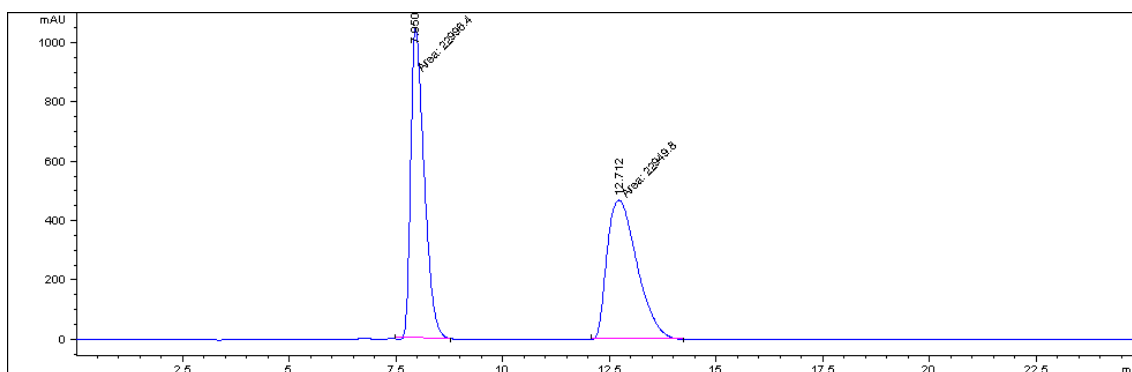

| # | t <sub>R</sub> | Area    | Height | Width  | Area%  | Symmetry |
|---|----------------|---------|--------|--------|--------|----------|
| 1 | 7.95           | 22996.4 | 1046.9 | 0.3661 | 50.051 | 0.553    |
| 2 | 12.712         | 22949.8 | 469.3  | 0.8151 | 49.949 | 0.623    |

Asymmetric reaction: 91:9 er

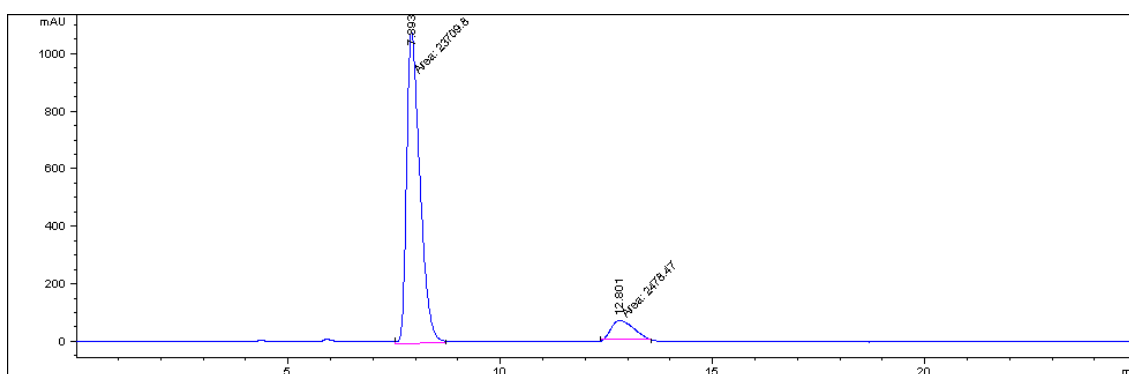

| # | t <sub>R</sub> | Area    | Height | Width  | Area%  | Symmetry |
|---|----------------|---------|--------|--------|--------|----------|
| 1 | 7.893          | 23709.8 | 1091.1 | 0.3622 | 90.536 | 0.555    |
| 2 | 12.801         | 2478.5  | 68     | 0.6076 | 9.464  | 0.586    |

**(S)-4-(2-fluorophenyl)-2-hydroxy-1,2-diphenylbut-3-yn-1-one (31)**

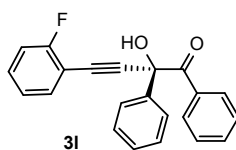

Chiralcel OD, hexane:isopropanol = 96:4, 1 mL min<sup>-1</sup>,  $\lambda$  = 254 nm HPLC

Racemic Compound

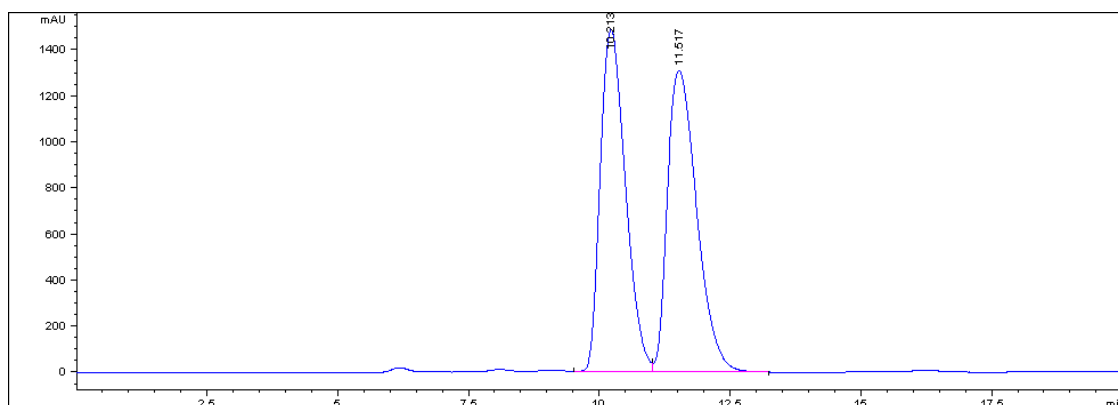

| # | Time   | Area    | Height | Width | Area%  | Symmetry |
|---|--------|---------|--------|-------|--------|----------|
| 1 | 10.213 | 49899.9 | 1486.5 | 0.526 | 49.367 | 0.688    |
| 2 | 11.517 | 51179.5 | 1309.9 | 0.603 | 50.633 | 0.622    |

Asymmetric reaction: 97:3 er

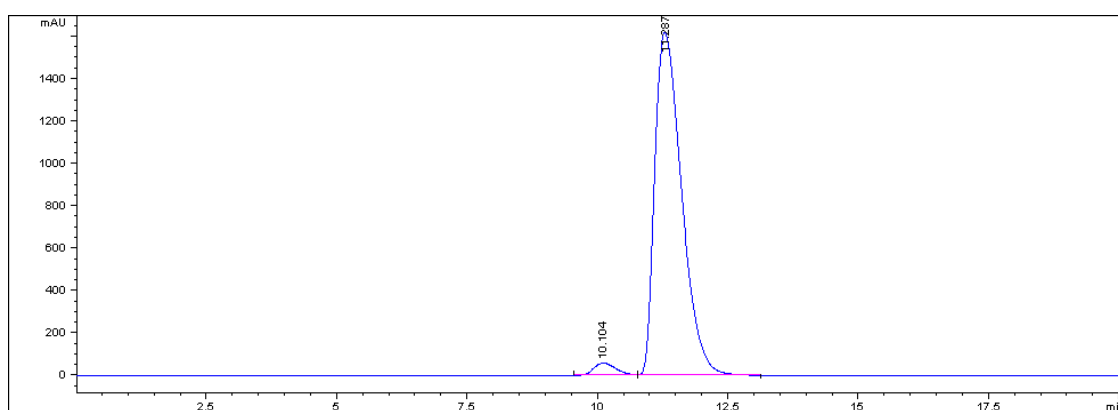

| # | Time   | Area    | Height | Width  | Area%  | Symmetry |
|---|--------|---------|--------|--------|--------|----------|
| 1 | 10.104 | 1755.2  | 58     | 0.4522 | 2.929  | 0.72     |
| 2 | 11.287 | 58172.4 | 1617.4 | 0.5668 | 97.071 | 0.576    |

**(S)-2-hydroxy-1,2-diphenyldec-3-yn-1-one (3n)**

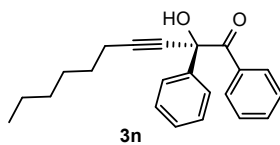

Chiralpak AD-H hexano: 2-propanol = 90 : 10, 1.0 mL min<sup>-1</sup>, λ = 254 nm

Racemic compound

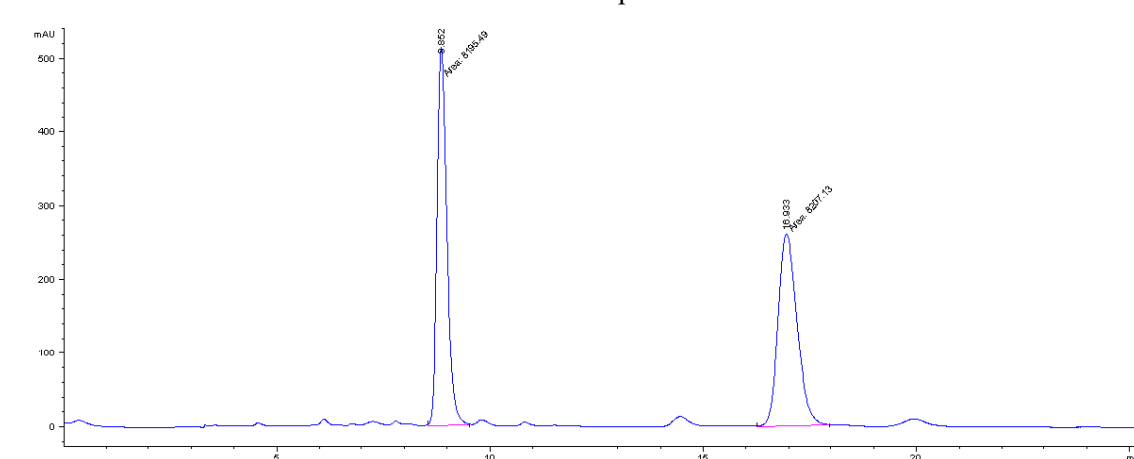

| # | t <sub>R</sub> | Area   | Height | Width  | Area%  | Symmetry |
|---|----------------|--------|--------|--------|--------|----------|
| 1 | 8.852          | 8195.5 | 514.5  | 0.2655 | 49.965 | 0.722    |
| 2 | 116.933        | 8207.1 | 262.1  | 0.5219 | 50.035 | 0.748    |

Asymmetric reaction: 86:14 er

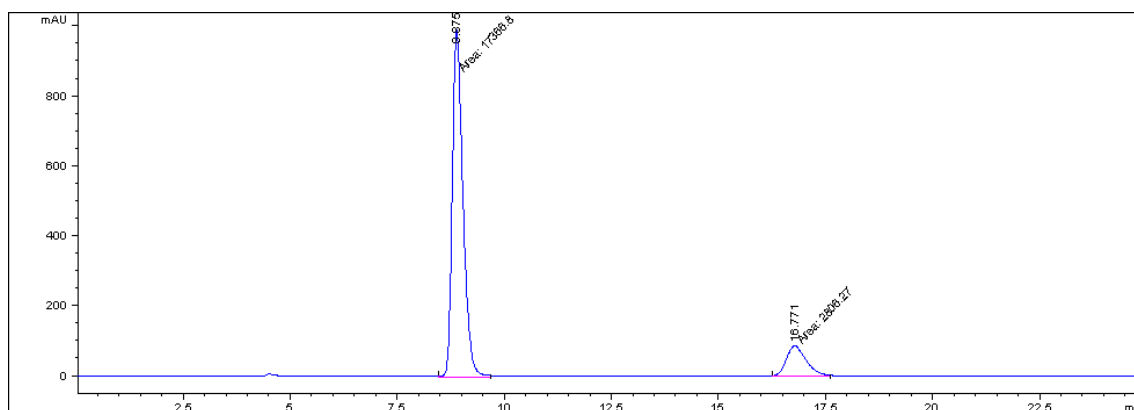

| # | t <sub>R</sub> | Area    | Height | Width  | Area%  | Symmetry |
|---|----------------|---------|--------|--------|--------|----------|
| 1 | 8.875          | 17366.8 | 994.1  | 0.2912 | 86.089 | 0.663    |
| 2 | 16.771         | 2806.3  | 86.2   | 0.5424 | 13.911 | 0.707    |

**(S)-4-ethyl-4-hydroxy-6-(p-tolyl)hex-5-yn-3-one (4c)**

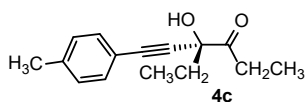

Chiralcel OJ, hexane:2-propanol = 96:4, 0.8 mL min<sup>-1</sup>,  $\lambda$  = 254 nm

Racemic Compound

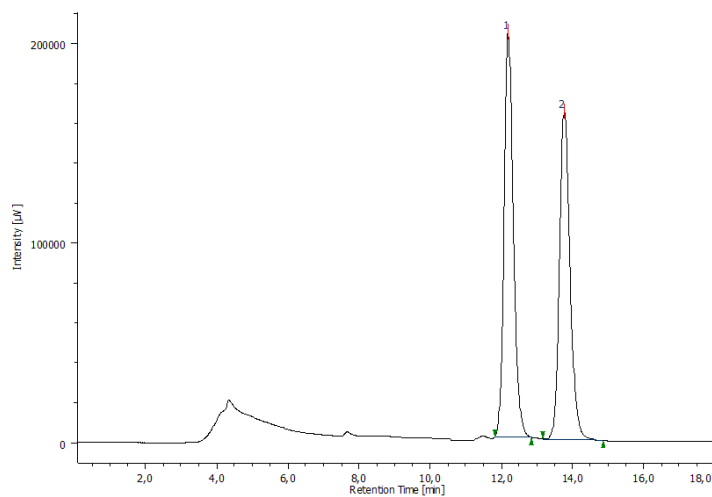

| # | tR [min] | Area[ $\mu$ V.sec] | Height[ $\mu$ V] | Area % | Height % | Symmetry Factor |
|---|----------|--------------------|------------------|--------|----------|-----------------|
| 1 | 12.175   | 3682381            | 202687           | 52.117 | 55.281   | 1.212           |
| 2 | 13.750   | 3383252            | 163960           | 47.883 | 44.719   | 1.190           |

Asymmetric reaction: >99:1 er

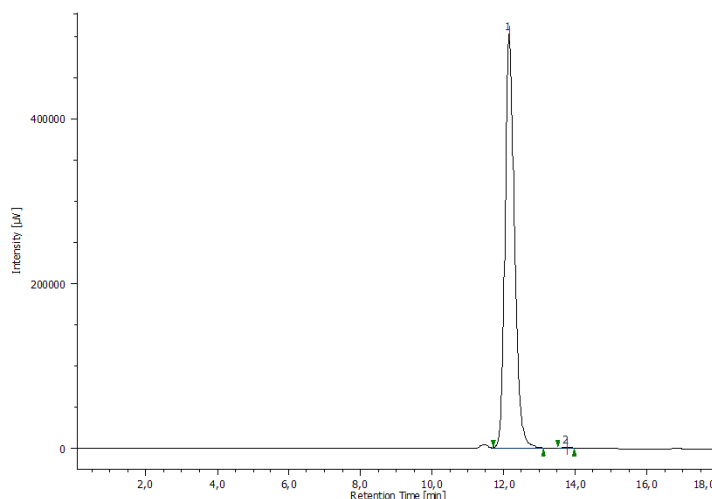

| # | tR [min] | Area[ $\mu$ V.sec] | Height[ $\mu$ V] | Area % | Height % | Symmetry Factor |
|---|----------|--------------------|------------------|--------|----------|-----------------|
| 1 | 12.142   | 9238289            | 502061           | 99.790 | 99.748   | 1.229           |
| 2 | 13.758   | 19416              | 1270             | 0.210  | 0.252    | 0.910           |

**(S)-6-(4-bromophenyl)-4-ethyl-4-hydroxyhex-5-yn-3-one (4d)**

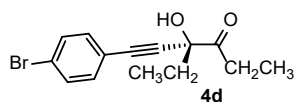

Chiralcel OJ, hexane : 2-propanol = 96 : 4, 0.8 mL min<sup>-1</sup>, λ = 254 nm

**Racemic Compound**

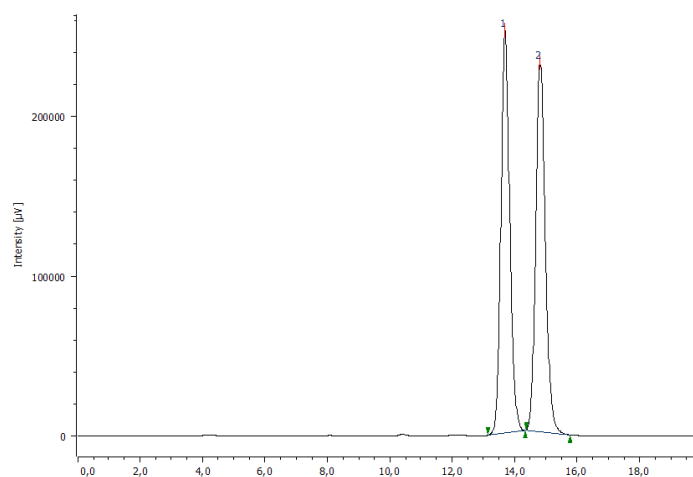

| # | tR [min] | Area[µV.sec] | Height[µV] | Area % | Height % | Symmetry Factor |
|---|----------|--------------|------------|--------|----------|-----------------|
| 1 | 13.667   | 4936746      | 251123     | 50.081 | 52.156   | 1.150           |
| 2 | 14.792   | 4920805      | 230360     | 49.919 | 47.844   | 1.168           |

**Asymmetric reaction: >99:1 er**

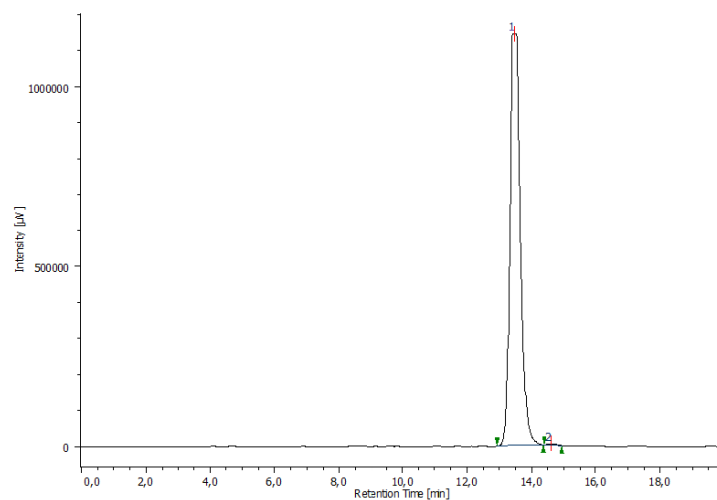

| # | tR [min] | Area[µV.sec] | Height[µV] | Area % | Height % | Symmetry Factor |
|---|----------|--------------|------------|--------|----------|-----------------|
| 1 | 13.458   | 26051820     | 1140634    | 99.751 | 99.678   | 1.223           |
| 2 | 14.600   | 65022        | 3683       | 0.249  | 0.322    | 1.273           |

**(S)-4-ethyl-6-(2-fluorophenyl)-4-hydroxyhex-5-yn-3-one (4e)**

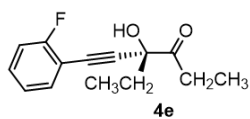

Lux-Amylose-1 hexane : 2-propanol = 96 : 4, 1.0 mL min<sup>-1</sup>, λ = 254 nm

Racemic compound

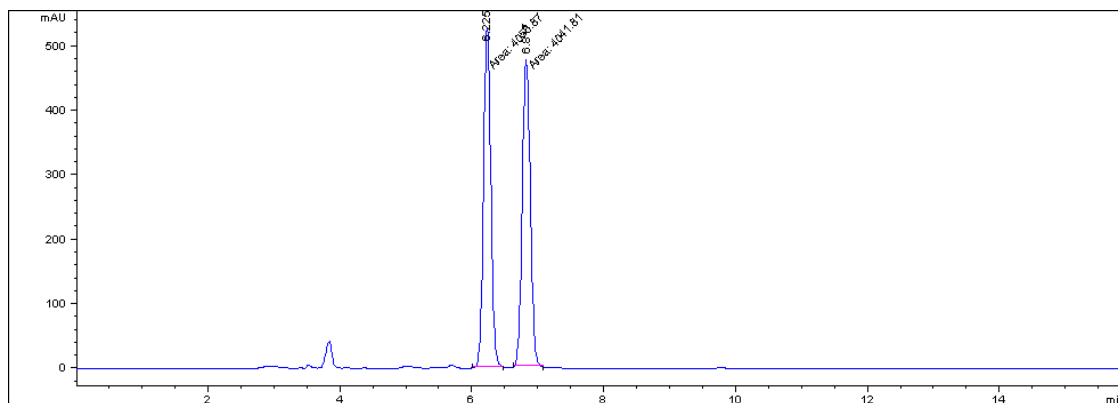

| # | Time  | Area   | Height | Width  | Area%  | Symmetry |
|---|-------|--------|--------|--------|--------|----------|
| 1 | 6.225 | 4056.9 | 527.8  | 0.1281 | 50.093 | 0.913    |
| 2 | 6.817 | 4041.8 | 476.7  | 0.1413 | 49.907 | 0.909    |

Asymmetric reaction: 95:5 er

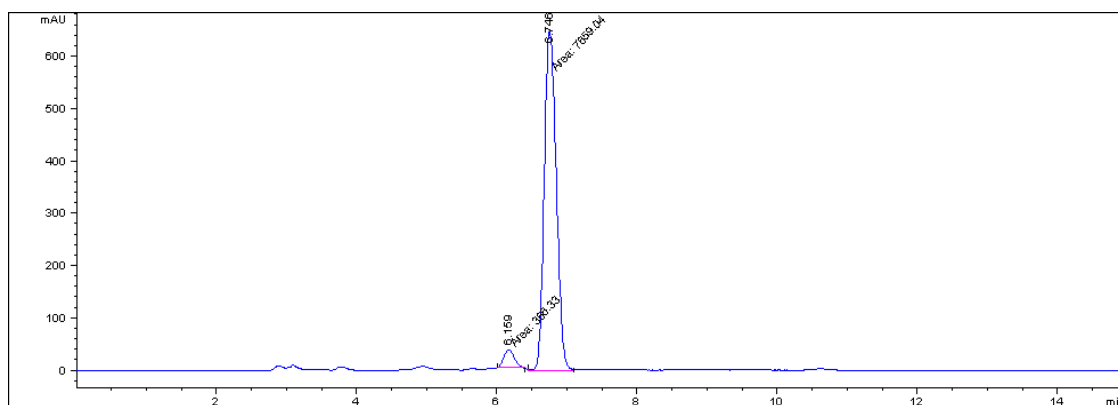

| # | Time  | Area  | Height | Width  | Area%  | Symmetry |
|---|-------|-------|--------|--------|--------|----------|
| 1 | 6.159 | 366.3 | 34.4   | 0.1773 | 4.565  | 0.786    |
| 2 | 6.746 | 7659  | 652.6  | 0.1956 | 95.435 | 0.788    |

**(S)-4-ethyl-4-hydroxy-6-(3-methoxyphenyl)hex-5-yn-3-one (4f)**

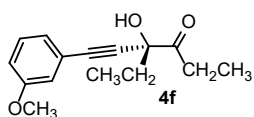

Chiralcel OD, hexane:isopropanol = 99:1, 1.0 mL min<sup>-1</sup>, λ = 254 nm

Racemic compound

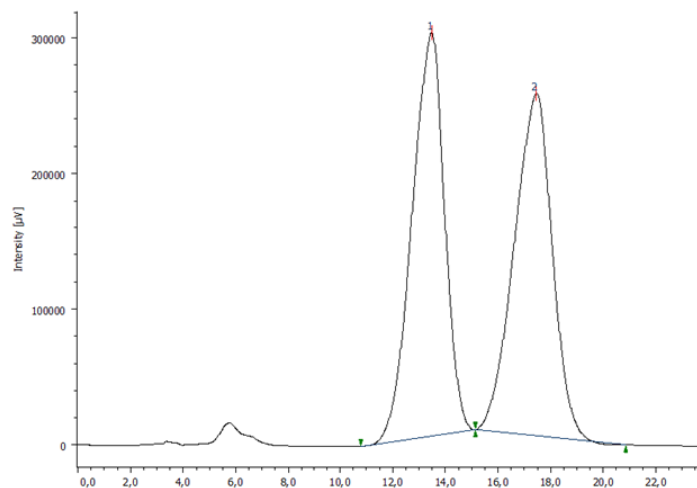

| # | tR [min] | Area[μV.sec] | Height[μV] | Area % | Height % | Symmetry Factor |
|---|----------|--------------|------------|--------|----------|-----------------|
| 1 | 13.502   | 25491356     | 296704     | 50.143 | 54.109   | 0.856           |
| 2 | 17.862   | 25345674     | 251641     | 49.857 | 45.891   | 0.896           |

Asymmetric reaction: 96:4 er

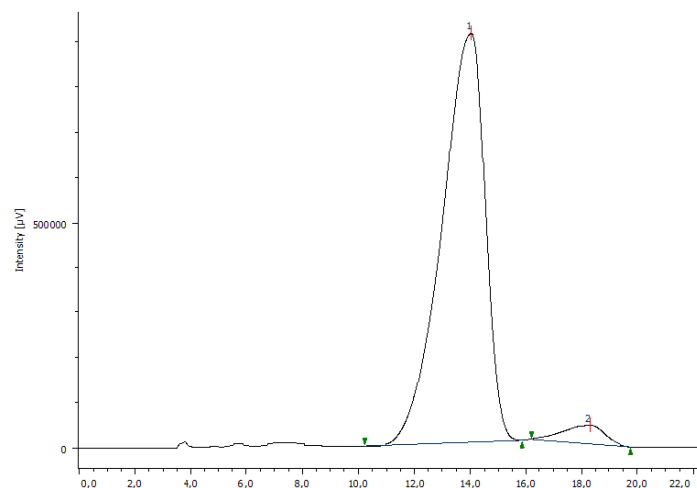

| # | tR [min] | Area[μV.sec] | Height[μV] | Area % | Height % | Symmetry Factor |
|---|----------|--------------|------------|--------|----------|-----------------|
| 1 | 14.608   | 97167786     | 905658     | 95.892 | 95.702   | 0.743           |
| 2 | 18.283   | 4163010      | 40669      | 4.108  | 4.298    | 0.790           |

**(S)-6-(3-chlorophenyl)-4-ethyl-4-hydroxyhex-5-yn-3-one (4g)**

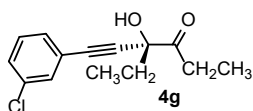

Lux-Cellulose-2, hexane:isopropanol = 98:2, 1.0 mL min<sup>-1</sup>,  $\lambda$  = 254 nm

Racemic compound

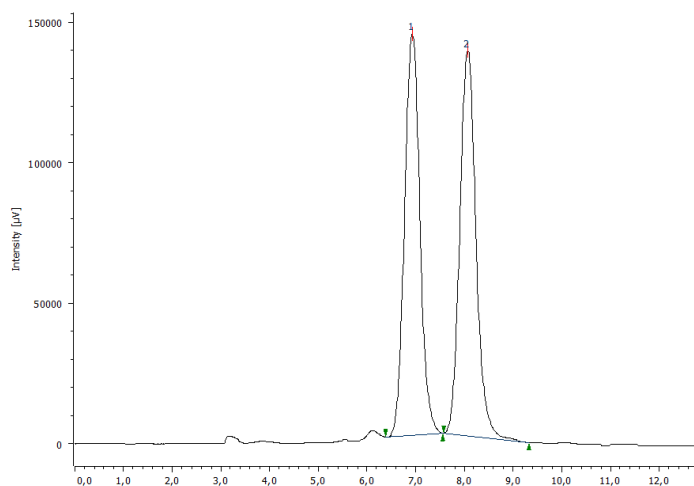

| # | tR [min] | Area[ $\mu$ V.sec] | Height[ $\mu$ V] | Area % | Height % | Symmetry Factor |
|---|----------|--------------------|------------------|--------|----------|-----------------|
| 1 | 6.925    | 3122810            | 142683           | 49.779 | 51.048   | 1.056           |
| 2 | 8.058    | 3150592            | 136826           | 50.221 | 48.952   | 1.131           |

Asymmetric reaction: 95:5 er

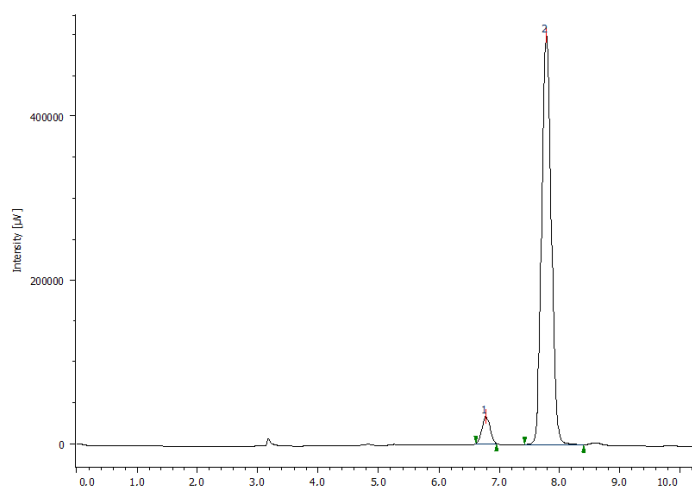

| # | tR [min] | Area[ $\mu$ V.sec] | Height[ $\mu$ V] | Area % | Height % | Symmetry Factor |
|---|----------|--------------------|------------------|--------|----------|-----------------|
| 1 | 6.767    | 305831             | 32603            | 5.177  | 6.142    | 1.010           |
| 2 | 7.775    | 5601551            | 498220           | 94.823 | 93.858   | 1.051           |



**(S)-4-ethyl-4-hydroxy-8-phenyloct-5-yn-3-one (4h).**

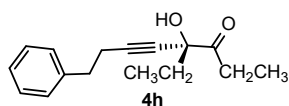

Chiralpak AD-H, hexane:isopropanol = 95:5, 1.0 mL min<sup>-1</sup>,  $\lambda = 220$  nm

Racemic Compound

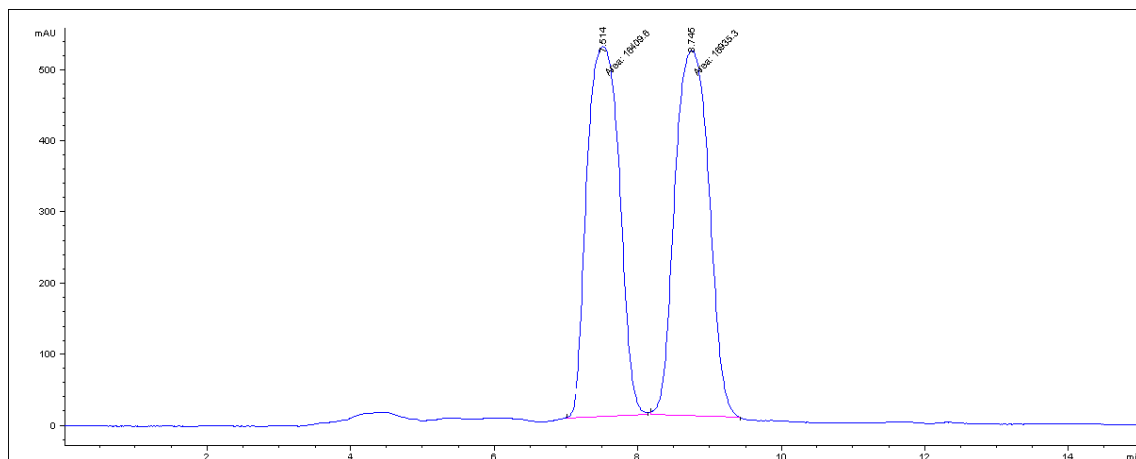

| # | Time  | Area    | Height | Width  | Area%  | Symmetry |
|---|-------|---------|--------|--------|--------|----------|
| 1 | 7.514 | 16409.6 | 520.9  | 0.5251 | 49.212 | 0.941    |
| 2 | 8.745 | 16935.3 | 513.8  | 0.5493 | 50.788 | 0.93     |

Asymmetric reaction: 90:10 er

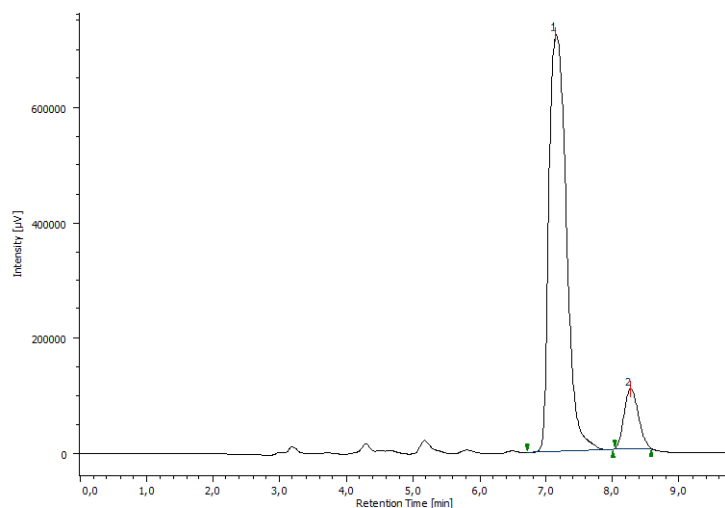

| # | tR [min] | Area[ $\mu$ V.sec] | Height[ $\mu$ V] | Area % | Height % | Symmetry Factor |
|---|----------|--------------------|------------------|--------|----------|-----------------|
| 1 | 7.133    | 13223206           | 720649           | 89.647 | 87.599   | 1.473           |
| 2 | 8.267    | 1527160            | 102017           | 10.353 | 12.401   | 1.136           |

(S)-4-Ethyl-4-hydroxydodec-5-yn-3-one (4i)

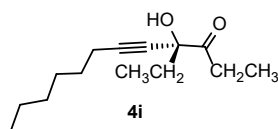

Chiralpak AD-H hexano:2-propanol = 99:1, 0.5 mL min<sup>-1</sup>, λ = 210 nm

Racemic Compound

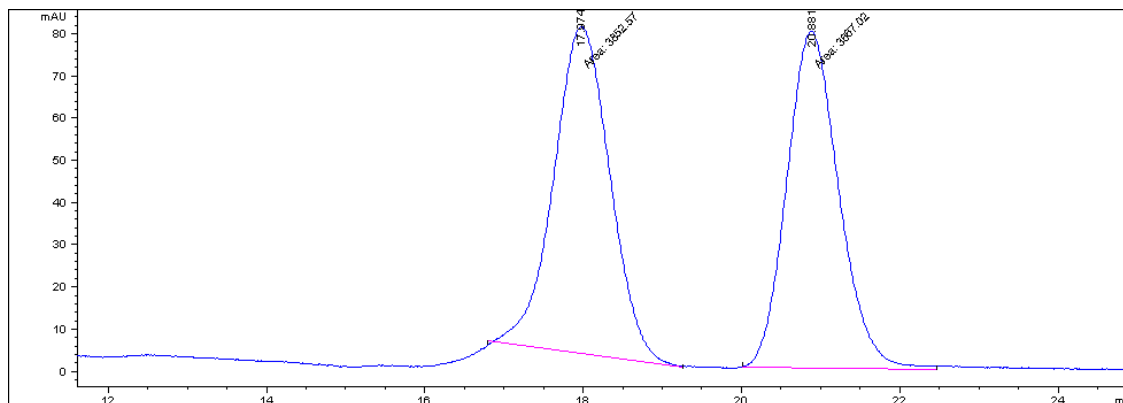

| # | Time   | Area   | Height | Width  | Area%  | Symmetry |
|---|--------|--------|--------|--------|--------|----------|
| 1 | 17.974 | 3852.6 | 77.6   | 0.8276 | 51.234 | 0.957    |
| 2 | 20.881 | 3667   | 80     | 0.7642 | 48.766 | 0.862    |

Asymmetric reaction: 94:6 er

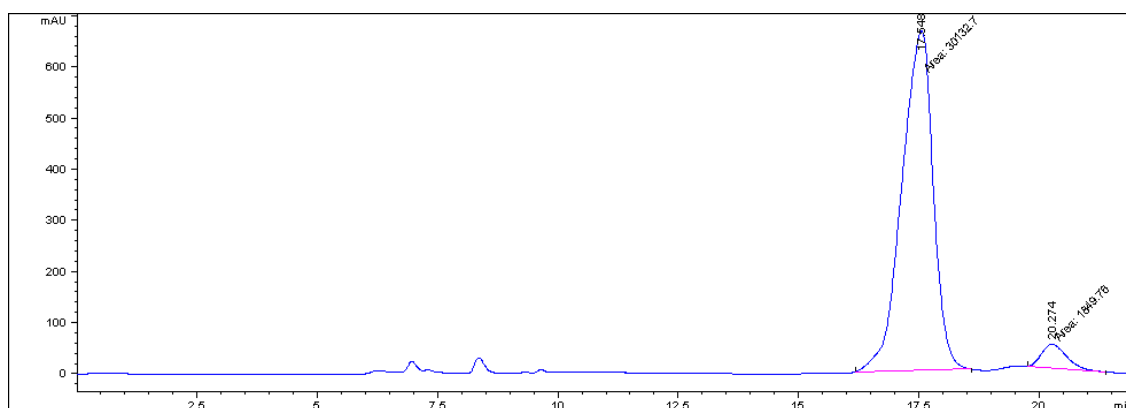

| # | Time   | Area    | Height | Width  | Area%  | Symmetry |
|---|--------|---------|--------|--------|--------|----------|
| 1 | 17.548 | 30132.7 | 664.5  | 0.7557 | 94.216 | 1.644    |
| 2 | 20.274 | 1849.8  | 48.4   | 0.6369 | 5.784  | 0.628    |

**(S)-4-ethyl-4-hydroxy-6-(trimethylsilyl)hex-5-yn-3-one (4j)**

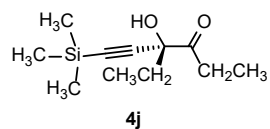

Chiralpak AD-H, hexane:isopropanol = 99:1, 0.5 mL min<sup>-1</sup>, λ = 210 nm

Racemic Compound

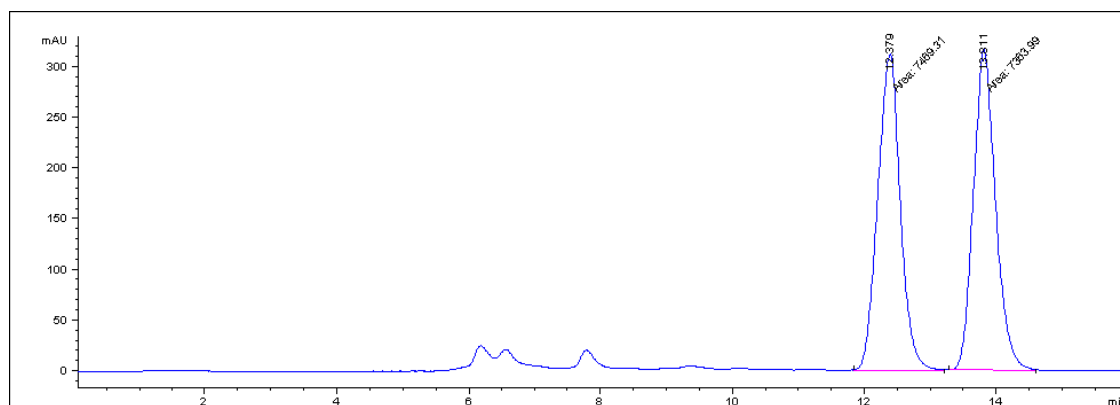

| # | Time   | Area   | Height | Width  | Area%  | Symmetry |
|---|--------|--------|--------|--------|--------|----------|
| 1 | 12.379 | 7469.3 | 312.6  | 0.3982 | 50.355 | 1.143    |
| 2 | 13.811 | 7364   | 316.4  | 0.3879 | 49.645 | 0.828    |

Asymmetric reaction: 92:8 er

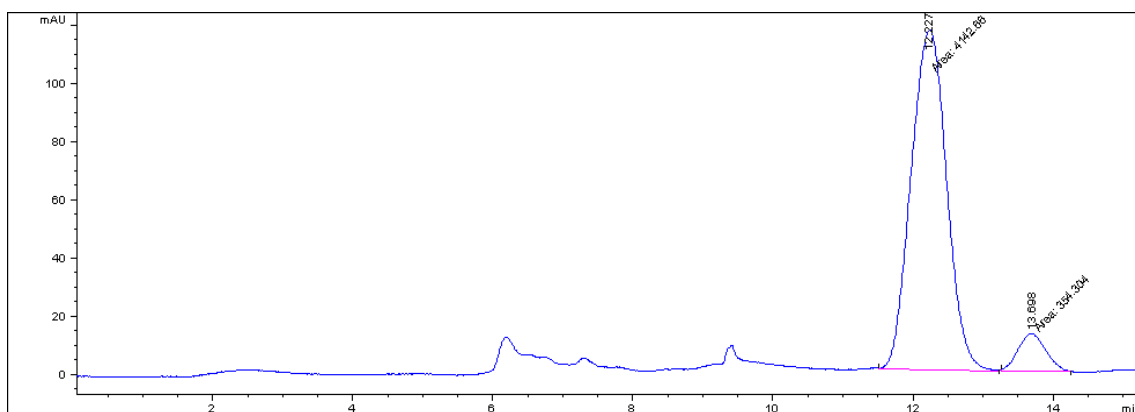

| # | Time   | Area   | Height | Width  | Area%  | Symmetry |
|---|--------|--------|--------|--------|--------|----------|
| 1 | 12.227 | 4142.7 | 116.9  | 0.5905 | 92.121 | 1.027    |
| 2 | 13.698 | 354.3  | 12.8   | 0.4613 | 7.879  | 1.038    |

**(S)-7-((tert-butyldimethylsilyloxy)-4-ethyl-4-hydroxyhept-5-yn-3-one (4k)**

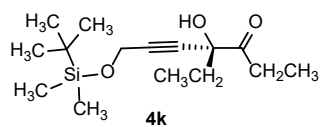

Chiralpak AD-H hexano:2-propanol = 95:5, 0.4 mL min<sup>-1</sup>, λ = 210 nm

**Racemic Compound**

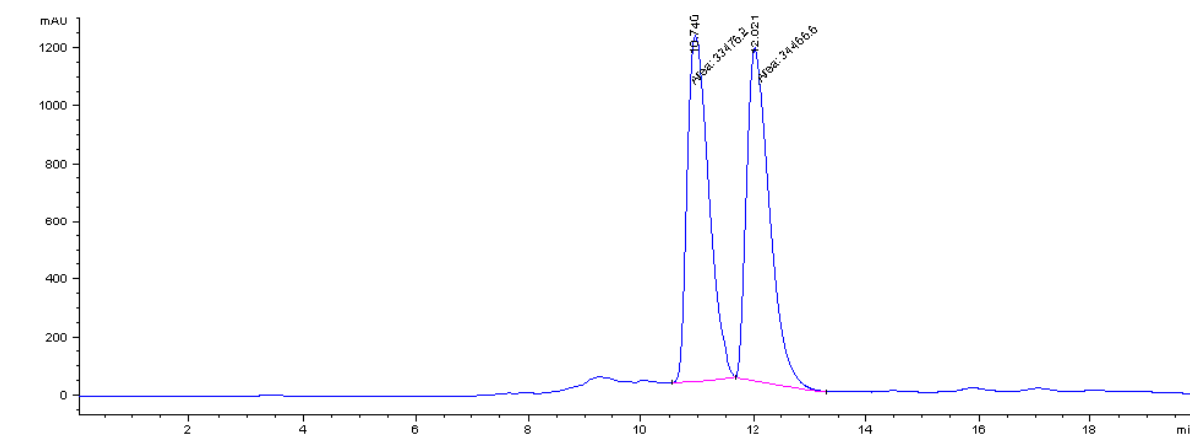

| # | t <sub>R</sub> | Area    | Height | Width  | Area%  | Symmetry |
|---|----------------|---------|--------|--------|--------|----------|
| 1 | 10.740         | 33476.2 | 1208.2 | 0.4563 | 49.271 | 0.825    |
| 2 | 12.021         | 34466.6 | 1176.2 | 0.5006 | 50.729 | 0.683    |

**Asymmetric reaction: 97:3 er**

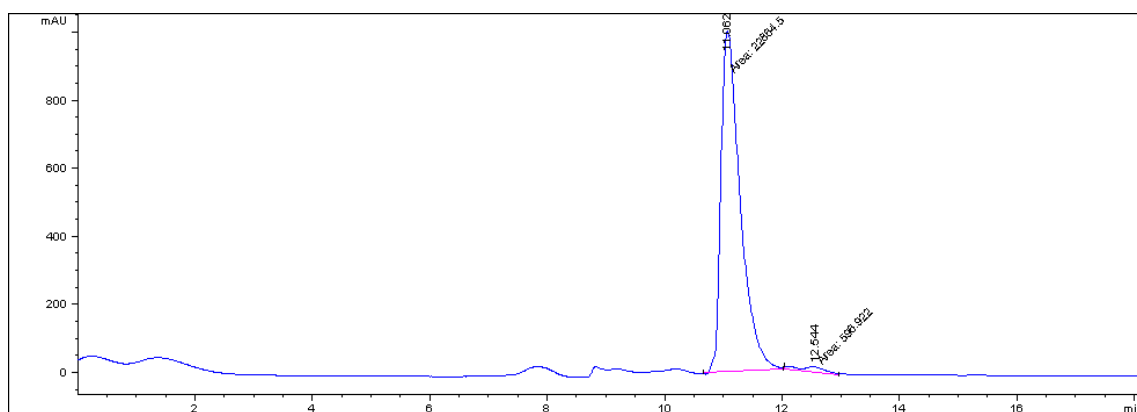

| # | t <sub>R</sub> | Area    | Height | Width  | Area%  | Symmetry |
|---|----------------|---------|--------|--------|--------|----------|
| 1 | 11.062         | 22864.5 | 1001.4 | 0.3806 | 97.456 | 0.495    |
| 2 | 12.544         | 596.9   | 17.7   | 0.5622 | 2.544  | 1.003    |

**(S)-2-hydroxy-1-(4-methoxyphenyl)-4-phenyl-2-(4-(trifluoromethyl)phenyl)but-3-yn-1-one (6b).**

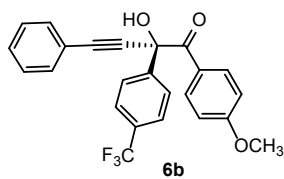

Lux-Amylose-1, hexane:isopropanol = 88:12, 1.0 mL min<sup>-1</sup>, λ = 254 nm

Racemic compound

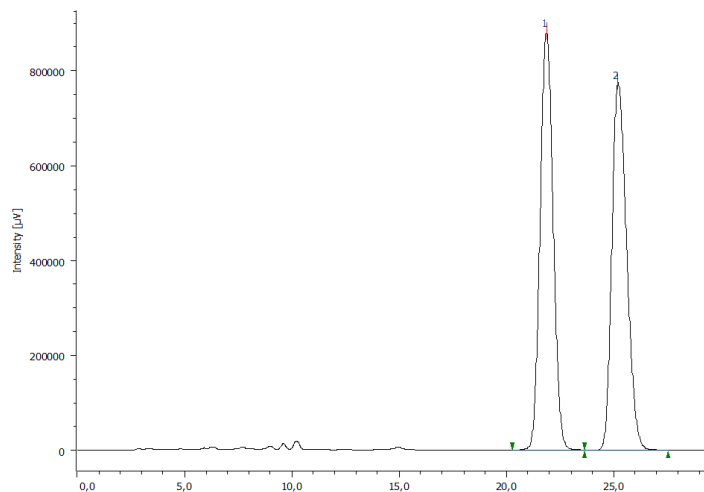

| # | tR [min] | Area [μV.sec] | Height [μV] | Area % | Height % | Symmetry Factor |
|---|----------|---------------|-------------|--------|----------|-----------------|
| 1 | 21.833   | 37183527      | 880517      | 50.042 | 53.210   | 1.073           |
| 2 | 25.167   | 37121562      | 774267      | 49.958 | 46.790   | 1.267           |

Asymmetric reaction: 96:4 er

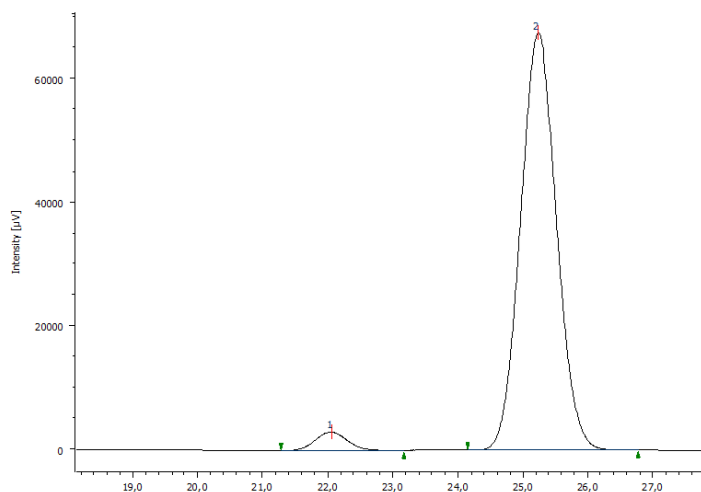

| # | tR [min] | Area [μV.sec] | Height [μV] | Area % | Height % | Symmetry Factor |
|---|----------|---------------|-------------|--------|----------|-----------------|
| 1 | 22.050   | 103174        | 3024        | 3.776  | 4.294    | 1.044           |
| 2 | 25.225   | 2629514       | 67400       | 96.224 | 95.706   | 1.059           |

**(R)-2-(2-chlorophenyl)-1-(3,4-dimethoxyphenyl)-2-hydroxy-4-(p-tolyl)but-3-yn-1-one (6d).**

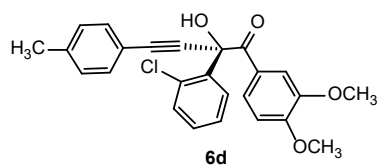

Chiralcel OD, hexane:isopropanol = 90:10, 1.0 mL min<sup>-1</sup>,  $\lambda = 254$  nm

**Racemic Compound**

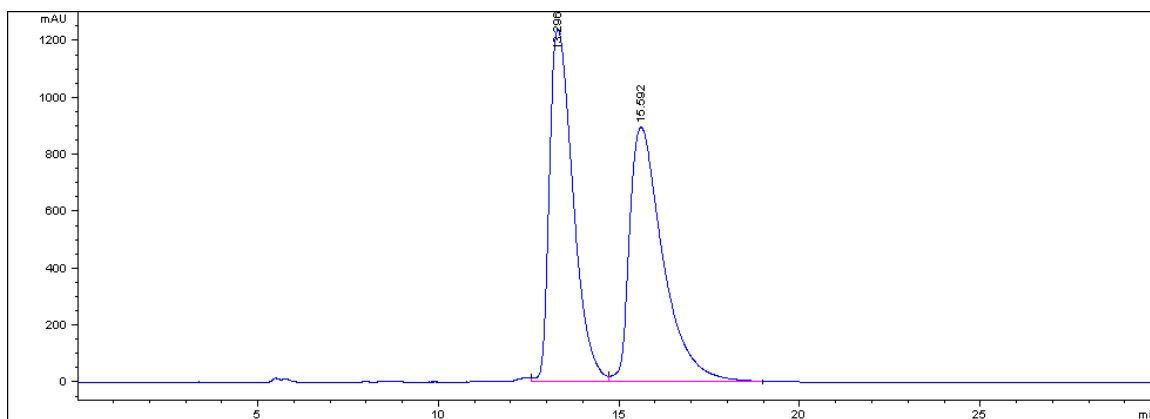

| # | Time   | Area    | Height | Width  | Area%  | Symmetry |
|---|--------|---------|--------|--------|--------|----------|
| 1 | 13.296 | 56507.1 | 1238.6 | 0.6474 | 49.631 | 0.545    |
| 2 | 15.592 | 57347.7 | 893.1  | 0.9475 | 50.369 | 0.482    |

**Asymmetric reaction: 95:5 er**

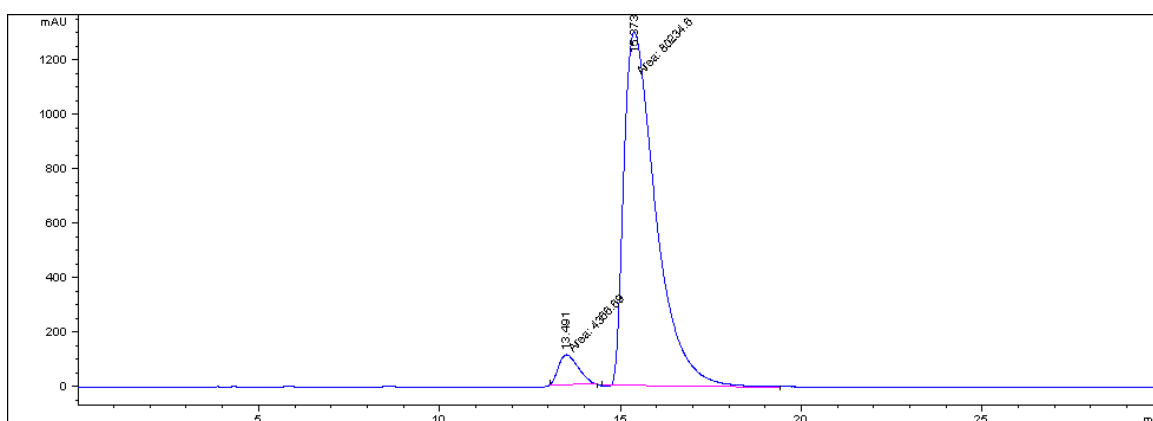

| # | Time   | Area    | Height | Width  | Area%  | Symmetry |
|---|--------|---------|--------|--------|--------|----------|
| 1 | 13.491 | 4366.7  | 113.1  | 0.6437 | 5.161  | 0.642    |
| 2 | 15.373 | 80234.6 | 1300.1 | 1.0285 | 94.839 | 0.467    |

**(R) -4-(4-bromophenyl)-2-(2-chlorophenyl)-1-(3,4-dimethoxyphenyl)-2-hydroxybut-3-yn-1-one (6e).**

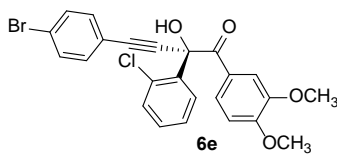

Chiralpak AD-H, hexane:isopropanol = 80:20, 1.5 mL min<sup>-1</sup>,  $\lambda = 254$  nm

Racemic Compound

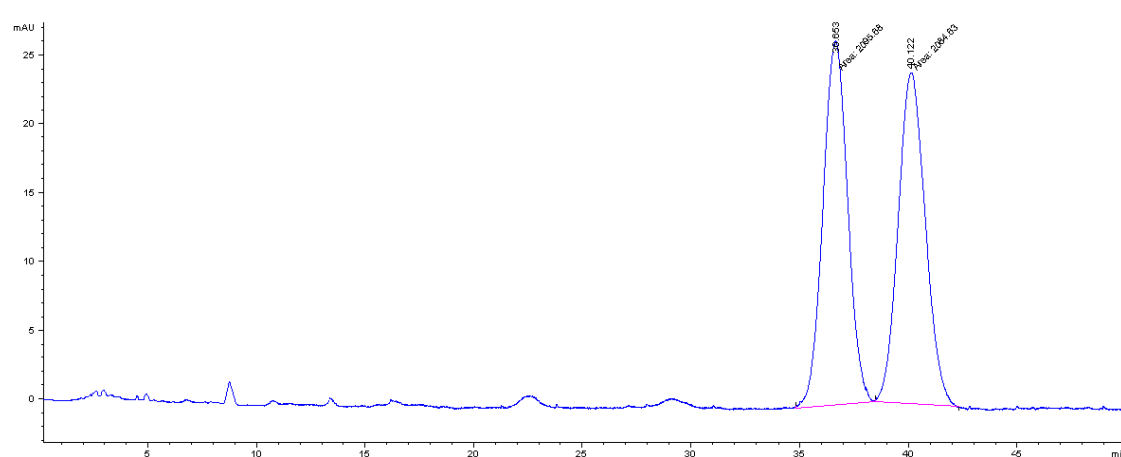

| # | Time   | Area   | Height | Width  | Area%  | Symmetry |
|---|--------|--------|--------|--------|--------|----------|
| 1 | 36.653 | 2095.7 | 26.5   | 1.3179 | 50.132 | 0.945    |
| 2 | 40.122 | 2084.6 | 24.1   | 1.4416 | 49.868 | 0.907    |

Asymmetric reaction: 94:6 er

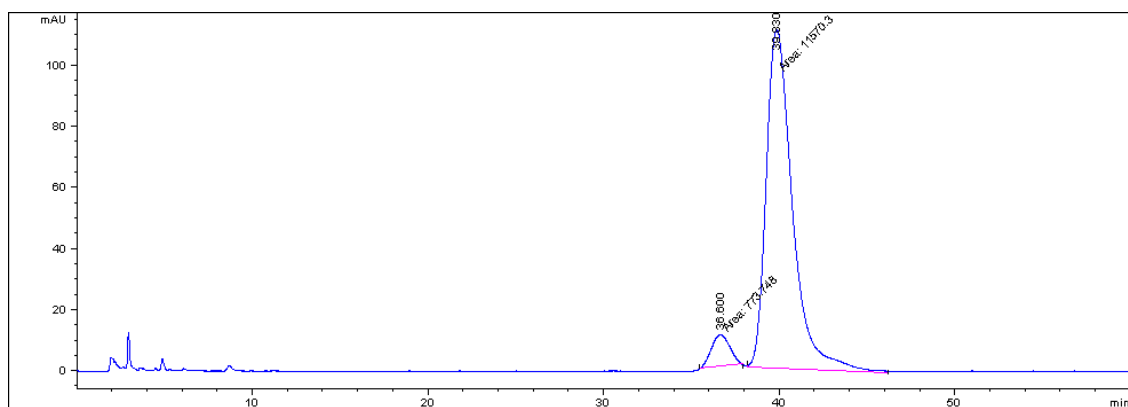

| # | Time  | Area    | Height | Width  | Area%  | Symmetry |
|---|-------|---------|--------|--------|--------|----------|
| 1 | 36.6  | 773.7   | 10.6   | 1.2214 | 6.268  | 0.88     |
| 2 | 39.83 | 11570.3 | 110.9  | 1.7389 | 93.732 | 0.634    |

**(R)-2-(2-chlorophenyl)-1-(3,4-dimethoxyphenyl)-2-hydroxydec-3-yn-1-one (6f)**

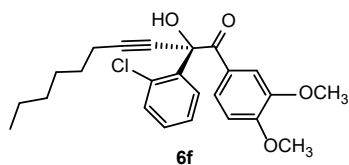

Lux-Cellulose-2, hexane:isopropanol = 90:10, 1.0 mL min<sup>-1</sup>, λ = 254 nm

Racemic compound

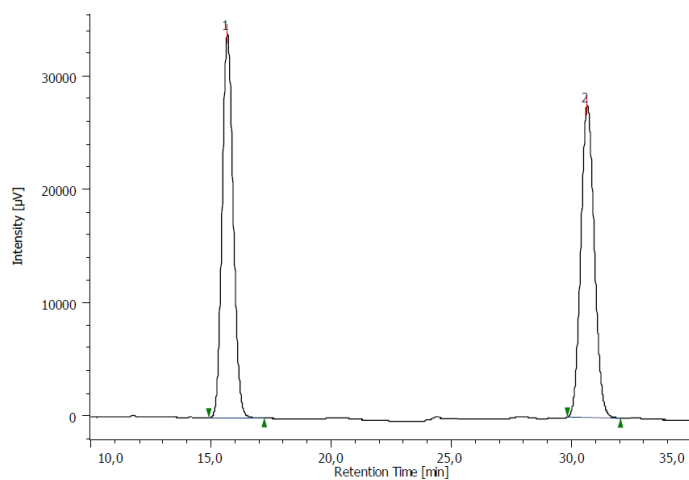

| # | tR [min] | Area [μV.sec] | Height [μV] | Area % | Height % | Symmetry Factor |
|---|----------|---------------|-------------|--------|----------|-----------------|
| 1 | 15.623   | 1075873       | 33834       | 50.134 | 55.153   | 1.102           |
| 2 | 30.613   | 1070101       | 27511       | 49.866 | 44.847   | 1.104           |

Asymmetric reaction: 97:3 er

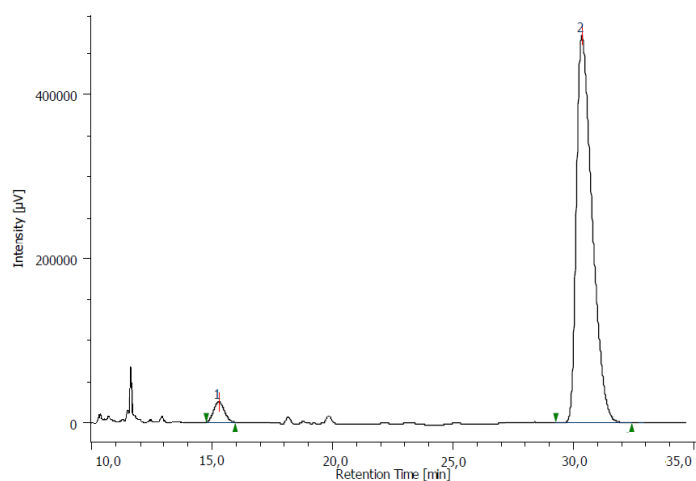

| # | tR [min] | Area [μV.sec] | Height [μV] | Area % | Height % | Symmetry Factor |
|---|----------|---------------|-------------|--------|----------|-----------------|
| 1 | 15.304   | 740800        | 24868       | 3.336  | 5.125    | 1.116           |
| 2 | 30.336   | 21342378      | 471249      | 96.664 | 94.987   | 1.625           |



**(R)-2-(2,4-dichlorophenyl)-2-hydroxy-1-(4-methoxyphenyl)-4-phenylbut-3-yn-1-one (6g)**

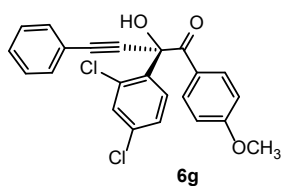

Chiralpak AS-H, hexane:isopropanol = 98:2, 1.0 mL min<sup>-1</sup>,  $\lambda$  = 254 nm

Racemic compound

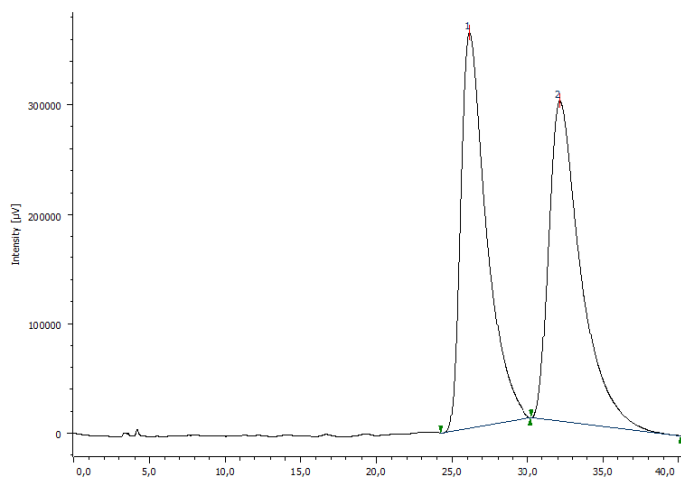

| # | tR [min] | Area [ $\mu$ V.sec] | Height [ $\mu$ V] | Area % | Height % | Symmetry Factor |
|---|----------|---------------------|-------------------|--------|----------|-----------------|
| 1 | 26.100   | 42872916            | 360589            | 50.021 | 55.214   | 1.867           |
| 2 | 32.108   | 42837095            | 292489            | 49.979 | 44.786   | 1.875           |

Asymmetric reaction: 94:6 er

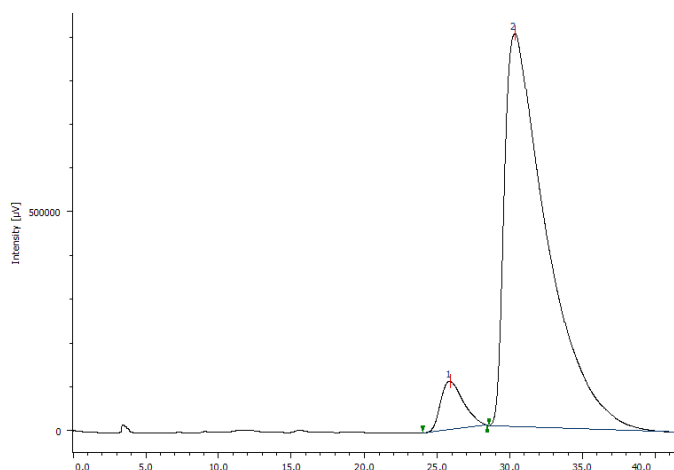

| # | tR [min] | Area [ $\mu$ V.sec] | Height [ $\mu$ V] | Area % | Height % | Symmetry Factor |
|---|----------|---------------------|-------------------|--------|----------|-----------------|
| 1 | 25.833   | 11944713            | 110876            | 6.162  | 11.006   | 1.438           |
| 2 | 30.317   | 181899096           | 896541            | 93.838 | 88.994   | 2.870           |

**(R)-2-(2,4-dichlorophenyl)-2-hydroxy-1-(4-methoxyphenyl)-4-(p-tolyl)but-3-yn-1-one (6h)**

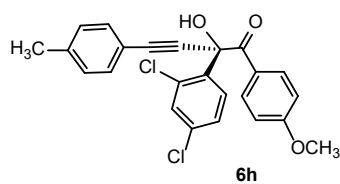

Chiralcel OD, hexane:isopropanol = 95:5, 1.0 mL min<sup>-1</sup>,  $\lambda = 254$  nm

Racemic compound

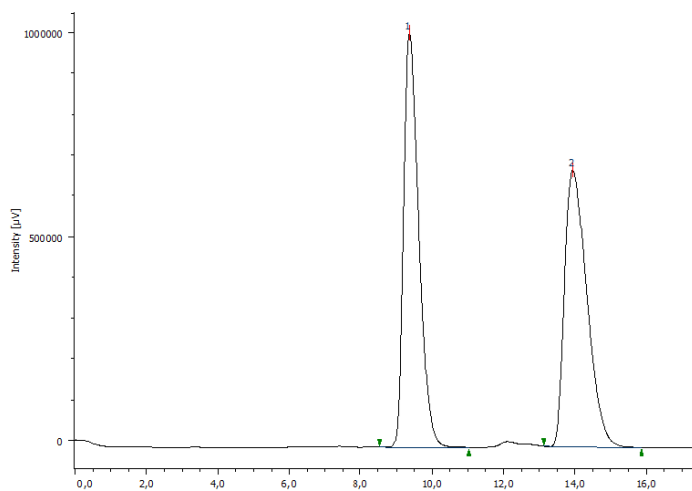

| # | tR [min] | Area [µV.sec] | Height [µV] | Area % | Height % | Symmetry Factor |
|---|----------|---------------|-------------|--------|----------|-----------------|
| 1 | 9.367    | 30322570      | 1013242     | 50.689 | 59.952   | 1.424           |
| 2 | 13.925   | 29498786      | 676834      | 49.311 | 40.048   | 1.548           |

Asymmetric reaction: 92:8 er

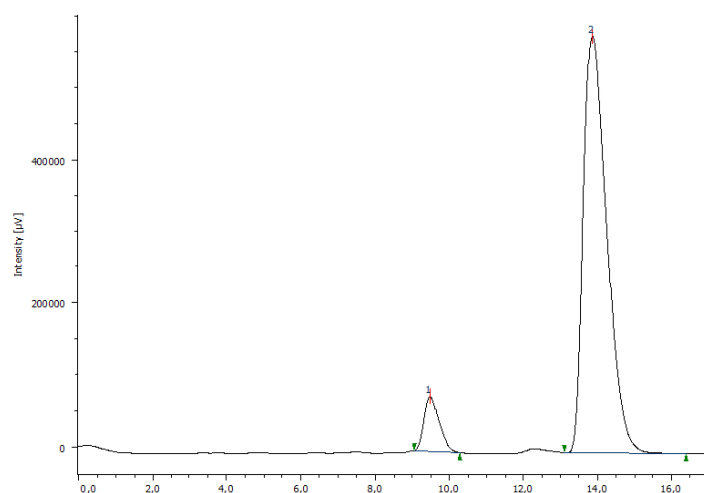

| # | tR [min] | Area [µV.sec] | Height [µV] | Area % | Height % | Symmetry Factor |
|---|----------|---------------|-------------|--------|----------|-----------------|
| 1 | 9.458    | 2143214       | 75316       | 7.798  | 11.532   | 1.386           |
| 2 | 13.842   | 25340977      | 577785      | 92.202 | 88.468   | 1.518           |

**(R)-4-(4-bromophenyl)-2-(2,4-dichlorophenyl)-2-hydroxy-1-(4-methoxyphenyl)but-3-yn-1-one (6i)**

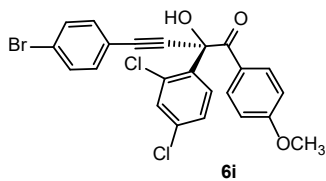

Lux-Cellulose-2, hexane:isopropanol = 95:5, 1.0 mL min<sup>-1</sup>, λ = 254 nm

Racemic compound

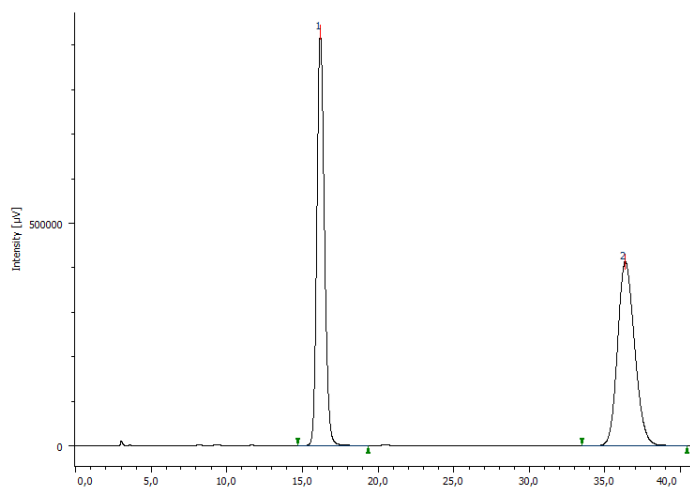

| # | tR [min] | Area [μV.sec] | Height [μV] | Area % | Height % | Symmetry Factor |
|---|----------|---------------|-------------|--------|----------|-----------------|
| 1 | 16.167   | 31837812      | 926004      | 49.836 | 69.246   | 1.175           |
| 2 | 36.308   | 32047438      | 411272      | 50.164 | 30.754   | 1.162           |

Asymmetric reaction: 98:11 er

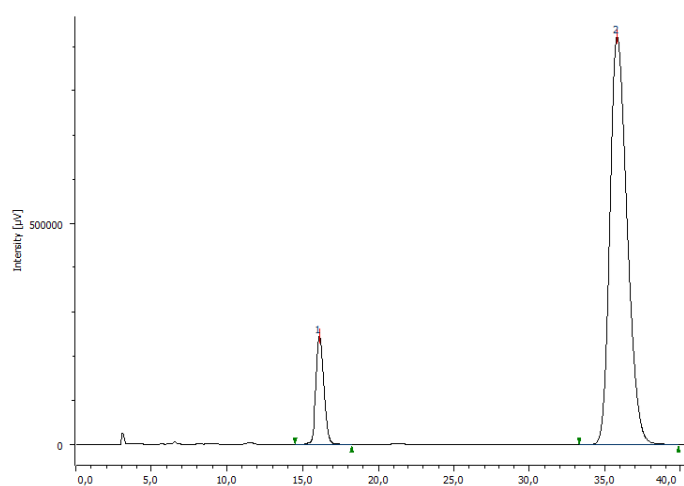

| # | tR [min] | Area [μV.sec] | Height [μV] | Area % | Height % | Symmetry Factor |
|---|----------|---------------|-------------|--------|----------|-----------------|
| 1 | 16.108   | 9144864       | 244317      | 11.225 | 20.982   | 1.127           |
| 2 | 35.767   | 72326754      | 920079      | 88.775 | 79.018   | 1.265           |

**(R)-4-(2-chlorophenyl)-4-hydroxy-2-methyl-6-phenylhex-5-yn-3-one (6k)**

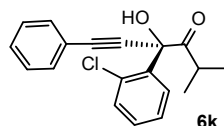

Chiralpak AS-H, hexane:isopropanol = 97:3, 1.0 mL min<sup>-1</sup>,  $\lambda = 254$  nm

Racemic compound

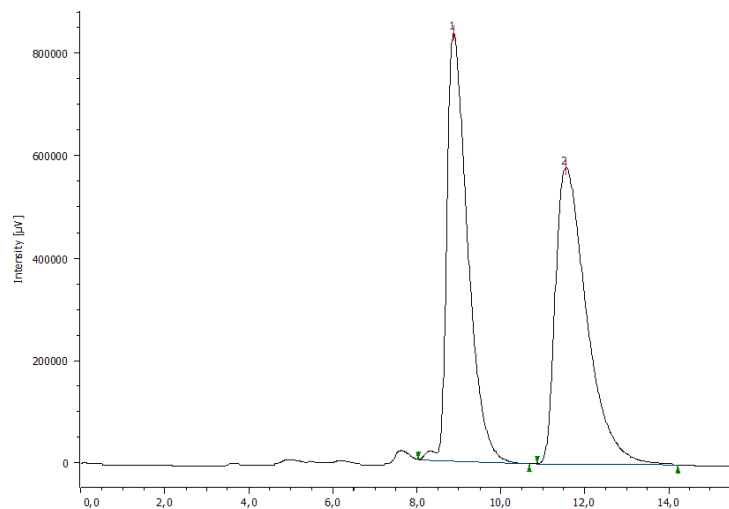

| # | tR [min] | Area [ $\mu$ V.sec] | Height [ $\mu$ V] | Area % | Height % | Symmetry Factor |
|---|----------|---------------------|-------------------|--------|----------|-----------------|
| 1 | 8.867    | 28663811            | 832717            | 49.082 | 59.066   | 1.891           |
| 2 | 11.542   | 29735522            | 577098            | 50.918 | 40.934   | 1.862           |

Asymmetric reaction: 93:7 er

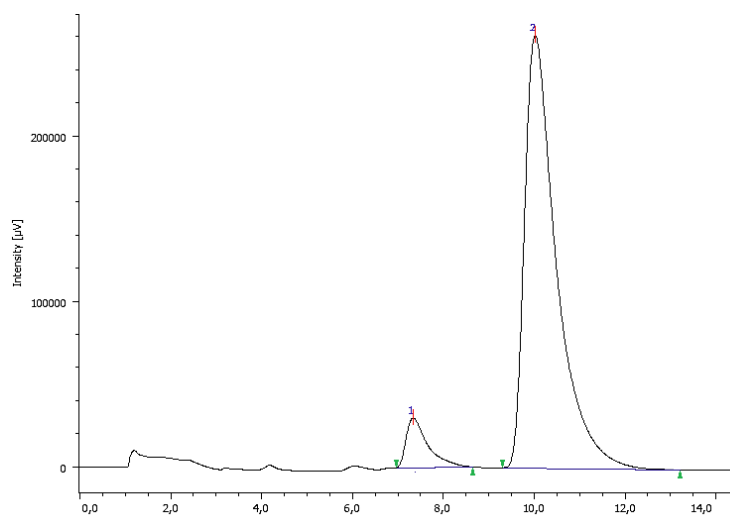

| # | tR [min] | Area [ $\mu$ V.sec] | Height [ $\mu$ V] | Area % | Height % | Symmetry Factor |
|---|----------|---------------------|-------------------|--------|----------|-----------------|
| 1 | 7.325    | 986741              | 29904             | 7.183  | 10.266   | 2.130           |
| 2 | 10.008   | 12750964            | 261398            | 92.817 | 89.734   | 1.967           |
